# Supplementary material for: Urine proteome changes in rats subcutaneously inoculated with approximately ten tumor cells
Source: PeerJ. 2019 Sep 17;7:e7717. doi: 10.7717/peerj.7717 (PMC6753921; doi:10.7717/peerj.7717)
Supplement: Table S1 [file peerj-07-7717-s003.xlsx]

## Sheet: Table S1
#	Visible?	Starred?	MS/MS View:824 Proteins in 752 Clusters<BR>With 2 Decoys	Accession Number	Molecular Weight	Protein Grouping Ambiguity	ANOVA Test (p-value)(p < 0.05)	Quantitative Profile	Rat1-D0-1	Rat1-D0-2	Rat2-D0-1	Rat2-D0-2	Rat3-D0-1	Rat3-D0-2	Rat4-D0-1	Rat4-D0-2	Rat5-D0-1	Rat5-D0-2	Rat6-D0-1	Rat6-D0-2	Rat7-D0-1	Rat7-D0-2	Rat8-D0-1	Rat8-D0-2	Rat9-D0-1	Rat9-D0-2	Rat1-D13-1	Rat1-D13-2	Rat2-D13-1	Rat2-D13-2	Rat3-D13-1	Rat3-D13-2	Rat4-D13-1	Rat4-D13-2	Rat5-D13-1	Rat5-D13-2	Rat6-D13-1	Rat6-D13-2	Rat7-D13-1	Rat7-D13-2	Rat8-D13-1	Rat8-D13-2	Rat9-D13-1	Rat9-D13-2	Rat1-D21-1	Rat1-D21-2	Rat2-D21-1	Rat2-D21-2	Rat3-D21-1
	TRUE	Empty	Cluster of Major urinary protein OS=Rattus norvegicus PE=1 SV=1 (MUP_RAT)	MUP_RAT [2]	21 kDa	TRUE	< 0.00010	CON low, D13 high, D21 high	67	60	70	73	69	64	108	95	113	116	141	128	182	226	74	85	61	61	507	404	533	446	467	504	467	505	394	380	581	483	708	494	383	368	417	394	821	701	1067	796	730
	TRUE	Empty	Serum albumin OS=Rattus norvegicus GN=Alb PE=1 SV=2	ALBU_RAT	69 kDa		0.00015	CON high, D13 low, D21 low	415	407	527	541	467	447	328	311	312	313	497	454	332	226	487	535	401	404	289	252	354	360	247	248	261	281	239	230	360	325	273	250	289	284	237	247	186	168	268	286	217
	TRUE	Empty	Uromodulin OS=Rattus norvegicus GN=Umod PE=2 SV=1	UROM_RAT	71 kDa		< 0.00010	CON low, D13 high, D21 high	94	105	94	82	86	84	140	136	149	156	153	134	144	121	73	67	69	72	181	203	214	221	254	270	229	233	206	215	284	308	288	315	241	251	304	313	218	250	311	352	296
	TRUE	Empty	Pro-epidermal growth factor OS=Rattus norvegicus GN=Egf PE=1 SV=2	EGF_RAT	124 kDa		< 0.00010	CON high, D13 low, D21 low	172	202	225	216	216	221	174	192	233	209	229	214	210	204	204	208	170	192	135	150	147	156	172	166	126	124	190	187	168	153	201	195	170	155	174	167	137	147	134	139	135
	TRUE	Empty	Serine protease inhibitor A3L OS=Rattus norvegicus GN=Serpina3l PE=1 SV=3	SPA3L_RAT	46 kDa	TRUE	0.00026	CON high, D13 high, D21 low	177	200	225	249	224	229	125	135	195	210	238	225	243	232	187	195	184	207	153	149	201	220	199	231	118	109	171	173	208	192	156	185	191	193	151	151	123	108	116	129	122
	TRUE	Empty	Urinary protein 2 OS=Rattus norvegicus PE=1 SV=1	UP2_RAT	11 kDa		< 0.00010	CON low, D13 low, D21 high	136	137	89	94	108	113	62	75	119	111	118	89	164	123	98	83	72	71	171	150	153	153	140	142	112	113	141	130	140	128	141	115	111	109	179	153	278	231	290	225	200
	TRUE	Empty	Serine protease inhibitor A3K OS=Rattus norvegicus GN=Serpina3k PE=1 SV=3	SPA3K_RAT	47 kDa	TRUE	< 0.00010	CON high, D13 low, D21 low	155	207	174	177	162	189	123	154	206	207	191	226	182	247	155	198	168	201	103	130	124	150	134	156	101	102	150	145	148	189	147	177	162	155	144	158	92	116	62	85	70
	TRUE	Empty	Low-density lipoprotein receptor-related protein 2 OS=Rattus norvegicus GN=Lrp2 PE=1 SV=1	LRP2_RAT	519 kDa		0.00013	CON high, D13 high, D21 low	88	81	174	164	189	147	148	138	126	116	145	145	69	65	157	147	162	151	113	103	127	104	122	121	126	115	140	139	100	91	125	127	123	130	112	128	71	91	62	79	91
	TRUE	Empty	Urinary protein 3 OS=Rattus norvegicus PE=3 SV=1	UP3_RAT	11 kDa		0.00013	CON low, D13 low, D21 high	127	120	100	100	138	112	88	84	120	113	155	98	172	152	108	93	103	91	145	115	133	123	125	124	120	109	134	122	136	126	147	116	105	105	145	143	222	185	207	181	157
	TRUE	Empty	Alpha-1-macroglobulin OS=Rattus norvegicus GN=A1m PE=1 SV=1	A1M_RAT	167 kDa		0.11	[]	83	81	147	133	163	164	95	83	83	92	118	123	83	86	151	134	104	98	118	107	110	110	139	124	95	85	119	112	117	112	119	118	116	108	91	95	90	91	92	98	127
	TRUE	Empty	Urinary protein 1 OS=Rattus norvegicus PE=1 SV=1	UP1_RAT	11 kDa		0.016	CON low, D13 low, D21 high	94	103	70	75	91	93	74	79	110	112	92	96	172	213	75	74	85	101	101	104	93	88	82	83	96	91	121	96	111	105	122	127	76	80	135	137	165	160	144	144	104
	TRUE	Empty	Hemopexin OS=Rattus norvegicus GN=Hpx PE=1 SV=3	HEMO_RAT	51 kDa		0.00023	CON low, D13 low, D21 high	98	90	82	67	77	72	59	59	96	92	97	84	162	126	84	76	69	63	96	92	81	90	85	85	74	74	70	75	91	92	93	82	62	78	79	81	122	134	116	124	90
	TRUE	Empty	Cluster of Alpha-1-inhibitor 3 OS=Rattus norvegicus GN=A1i3 PE=1 SV=1 (A1I3_RAT)	A1I3_RAT [3]	164 kDa	TRUE	0.0054	CON high, D13 high, D21 low	66	71	114	124	113	128	63	61	63	67	73	95	44	48	101	92	85	89	38	51	77	83	78	71	77	85	83	81	82	78	65	65	69	89	65	70	17	17	43	48	53
	TRUE	Empty	Serotransferrin OS=Rattus norvegicus GN=Tf PE=1 SV=3	TRFE_RAT	76 kDa		0.013	CON high, D13 low, D21 low	85	76	115	114	86	75	60	56	57	61	105	92	81	81	121	110	89	83	74	72	87	68	62	59	66	53	56	57	82	68	76	56	68	61	61	56	52	54	86	75	63
	TRUE	Empty	Plasminogen OS=Rattus norvegicus GN=Plg PE=2 SV=2	PLMN_RAT	91 kDa		0.0016	CON high, D13 low, D21 high	67	68	76	65	71	61	63	61	70	65	75	67	105	86	49	47	69	56	46	48	61	50	47	51	51	48	45	40	59	57	56	62	42	41	50	64	69	76	73	86	67
	TRUE	Empty	Ig kappa chain C region, B allele OS=Rattus norvegicus PE=1 SV=1	KACB_RAT	12 kDa	TRUE	0.53	[]	125	148	197	217	221	254	220	235	150	155	208	208	85	90	240	268	151	174	115	130	186	212	174	181	181	189	161	161	174	172	165	167	197	194	163	186	157	173	161	183	171
	TRUE	Empty	Cystatin-related protein 1 OS=Rattus norvegicus GN=Andpro PE=1 SV=1	22P1_RAT	21 kDa	TRUE	0.025	CON low, D13 high, D21 high	89	71	20	16	23	18	41	25	43	37	45	31	20	19	66	48	54	52	123	114	68	60	47	38	93	85	75	84	59	59	23	18	86	97	72	69	56	44	52	39	70
	TRUE	Empty	Prostatic steroid-binding protein C1 OS=Rattus norvegicus GN=Psbpc1 PE=1 SV=1	PSC1_RAT	13 kDa		0.015	CON low, D13 high, D21 high	39	41	31	29	11	18	41	38	30	39	46	57	16	17	55	62	75	68	85	86	81	75	47	41	81	82	97	86	74	75	22	25	74	60	63	54	27	43	39	49	46
	TRUE	Empty	Cluster of Submandibular glandular kallikrein-9 OS=Rattus norvegicus GN=Klk9 PE=1 SV=1 (KLK9_RAT)	KLK9_RAT [2]	28 kDa	TRUE	0.1	[]	80	70	21	22	15	18	34	24	52	42	50	40	20	17	69	57	73	60	104	86	81	73	41	40	73	62	75	79	69	62	15	18	75	67	49	51	45	48	55	51	69
	TRUE	Empty	Fibronectin OS=Rattus norvegicus GN=Fn1 PE=1 SV=2	FINC_RAT	273 kDa		< 0.00010	CON high, D13 low, D21 low	65	80	68	58	63	61	57	56	65	65	57	73	49	65	62	56	62	63	35	40	34	32	41	43	26	33	38	39	46	39	44	52	28	34	49	36	59	58	51	46	47
	TRUE	Empty	Cluster of Secretoglobin family 2A member 2 OS=Rattus norvegicus GN=Scgb2a2 PE=1 SV=1 (SG2A2_RAT)	SG2A2_RAT [2]	11 kDa	TRUE	0.043	CON low, D13 high, D21 high	40	48	26	10	9	9	20	19	36	37	21	45	20	12	31	50	49	50	67	58	41	50	31	23	72	66	67	64	42	56	14	8	56	55	39	36	28	18	24	36	40
	TRUE	Empty	Meprin A subunit alpha OS=Rattus norvegicus GN=Mep1a PE=1 SV=2	MEP1A_RAT	85 kDa		0.014	CON high, D13 high, D21 low	46	47	51	46	68	54	38	41	56	57	53	48	40	36	54	50	54	53	50	53	45	45	47	47	36	40	44	54	45	44	42	42	45	42	51	46	45	37	45	42	45
	TRUE	Empty	Cadherin-1 OS=Rattus norvegicus GN=Cdh1 PE=1 SV=1	CADH1_RAT	99 kDa	TRUE	< 0.00010	CON high, D13 low, D21 low	65	66	59	56	46	53	43	35	69	55	60	44	49	70	62	48	53	46	43	34	43	31	44	36	33	27	37	35	31	31	36	43	43	47	44	43	28	23	22	18	40
	TRUE	Empty	Gelsolin OS=Rattus norvegicus GN=Gsn PE=1 SV=1	GELS_RAT	86 kDa		0.072	[]	25	36	30	31	32	36	36	38	55	51	29	33	49	40	30	28	33	29	38	43	50	37	47	46	47	47	45	42	39	43	43	45	37	35	43	39	34	43	30	39	46
	TRUE	Empty	Deoxyribonuclease-1 OS=Rattus norvegicus GN=Dnase1 PE=2 SV=1	DNAS1_RAT	32 kDa		< 0.00010	CON high, D13 high, D21 low	29	35	62	63	52	60	46	56	42	38	41	40	32	25	42	59	54	63	32	38	37	40	40	46	34	31	54	45	31	35	38	33	43	36	44	34	25	22	30	22	28
	TRUE	Empty	Neutral and basic amino acid transport protein rBAT OS=Rattus norvegicus GN=Slc3a1 PE=1 SV=1	SLC31_RAT	79 kDa		0.051	[]	5	4	18	20	23	26	80	84	25	26	16	17	24	23	26	29	44	42	47	47	32	36	56	53	75	80	44	40	40	31	51	59	43	33	45	52	32	34	19	12	52
	TRUE	Empty	Protein AMBP OS=Rattus norvegicus GN=Ambp PE=1 SV=1	AMBP_RAT	39 kDa		0.0016	CON high, D13 low, D21 high	45	41	36	31	46	42	48	57	47	42	44	43	73	73	31	29	51	44	37	33	28	40	40	40	24	27	29	21	31	29	27	27	27	25	37	38	59	51	59	55	50
	TRUE	Empty	Alpha-1-antiproteinase OS=Rattus norvegicus GN=Serpina1 PE=1 SV=2	A1AT_RAT	46 kDa		0.13	[]	45	38	76	70	49	46	41	37	33	30	61	51	30	26	59	56	53	46	32	36	53	49	32	31	33	33	27	29	54	59	42	41	41	36	25	28	22	18	42	53	28
	TRUE	Empty	Aminopeptidase N OS=Rattus norvegicus GN=Anpep PE=1 SV=2	AMPN_RAT	109 kDa		0.18	[]	25	20	31	26	34	30	67	68	34	37	37	31	18	31	50	44	32	30	50	53	37	33	37	38	56	54	44	38	49	43	47	46	50	50	33	37	43	40	27	34	40
	TRUE	Empty	Polymeric immunoglobulin receptor OS=Rattus norvegicus GN=Pigr PE=1 SV=1	PIGR_RAT	85 kDa		0.027	CON low, D13 high, D21 low	47	35	40	35	32	33	29	21	36	30	38	33	63	61	36	29	37	33	47	44	51	50	53	38	42	34	44	45	44	39	41	35	45	42	55	39	41	33	33	26	28
	TRUE	Empty	Matrix-remodeling-associated protein 8 OS=Rattus norvegicus GN=Mxra8 PE=2 SV=1	MXRA8_RAT	43 kDa		0.5	[]	46	48	30	36	45	37	27	26	35	46	32	33	36	36	25	32	40	30	30	40	27	32	40	45	27	27	42	32	29	29	32	34	35	31	37	36	38	43	21	29	28
	TRUE	Empty	Alpha-2-HS-glycoprotein OS=Rattus norvegicus GN=Ahsg PE=1 SV=2	FETUA_RAT	38 kDa		0.00026	CON high, D13 low, D21 high	38	39	46	41	27	27	27	30	46	47	39	45	81	81	27	29	44	31	20	15	19	28	22	23	17	14	20	16	19	20	20	22	15	14	23	26	35	53	27	48	32
	TRUE	Empty	Afamin OS=Rattus norvegicus GN=Afm PE=3 SV=1	AFAM_RAT	69 kDa		0.31	[]	26	33	38	34	39	34	33	28	33	36	34	28	22	33	41	37	31	27	26	32	33	35	29	30	34	36	39	26	39	29	33	34	34	36	37	31	31	29	31	33	33
	TRUE	Empty	Ig lambda-2 chain C region OS=Rattus norvegicus PE=4 SV=1	LAC2_RAT	11 kDa		0.31	[]	45	43	28	18	35	27	23	21	37	22	32	37	40	36	22	29	27	22	45	29	32	27	51	35	34	32	26	32	33	37	37	24	40	33	39	26	36	34	22	27	34
	TRUE	Empty	Urokinase-type plasminogen activator OS=Rattus norvegicus GN=Plau PE=1 SV=1	UROK_RAT	48 kDa		< 0.00010	CON high, D13 high, D21 low	44	40	38	39	43	34	28	27	39	33	47	37	34	22	47	37	43	40	31	31	36	27	34	32	30	26	33	34	33	23	44	31	32	38	26	26	28	24	27	18	27
	TRUE	Empty	Glutamyl aminopeptidase OS=Rattus norvegicus GN=Enpep PE=1 SV=2	AMPE_RAT	108 kDa		0.00034	CON high, D13 high, D21 low	23	22	34	34	28	31	34	39	25	24	17	22	28	26	35	28	28	30	21	28	24	24	29	24	34	31	23	27	24	23	33	31	34	31	28	30	13	16	15	20	21
	TRUE	Empty	Kallikrein-1 OS=Rattus norvegicus GN=Ngfg PE=2 SV=2	KLK1_RAT	29 kDa	TRUE	0.048	CON high, D13 high, D21 low	39	31	28	31	33	37	32	27	31	30	35	28	30	40	41	45	29	29	24	32	27	23	31	31	21	22	33	33	25	24	38	30	41	38	36	38	36	34	28	14	25
	TRUE	Empty	Cluster of Glandular kallikrein-7, submandibular/renal OS=Rattus norvegicus GN=Klk7 PE=1 SV=1 (KLK7_RAT)	KLK7_RAT [2]	29 kDa	TRUE	< 0.00010	CON high, D13 low, D21 low	53	46	44	43	56	41	43	36	46	47	53	38	40	45	60	51	40	40	43	41	40	29	31	34	34	31	38	41	23	33	37	34	36	36	30	34	35	45	30	31	33
	TRUE	Empty	Cluster of T-kininogen 1 OS=Rattus norvegicus GN=Map1 PE=1 SV=2 (KNT1_RAT)	KNT1_RAT [2]	48 kDa	TRUE	0.086	[]	38	40	30	28	28	32	23	25	28	27	29	37	46	39	34	30	21	25	19	25	24	30	24	27	26	25	25	23	26	31	28	27	23	26	22	23	25	27	21	17	27
	TRUE	Empty	Vitamin D-binding protein OS=Rattus norvegicus GN=Gc PE=1 SV=3	VTDB_RAT	54 kDa		< 0.00010	CON high, D13 low, D21 low	45	50	58	67	32	38	27	37	33	33	46	44	24	12	54	56	34	44	25	21	23	30	19	19	21	28	17	13	26	24	19	27	29	33	23	21	7	9	25	23	8
	TRUE	Empty	Protein-glutamine gamma-glutamyltransferase 4 OS=Rattus norvegicus GN=Tgm4 PE=1 SV=2	TGM4_RAT	76 kDa		0.031	CON low, D13 high, D21 low	0	1	22	25	9	13	21	22	28	32	38	39	0	0	18	22	55	49	19	33	58	64	35	38	45	47	72	81	26	23	5	9	60	55	13	16	0	0	12	9	21
	TRUE	Empty	Cluster of Actin, cytoplasmic 1 OS=Rattus norvegicus GN=Actb PE=1 SV=1 (ACTB_RAT)	ACTB_RAT [4]	42 kDa	TRUE	0.0026	CON low, D13 high, D21 low	29	6	22	25	27	22	43	43	24	22	17	22	26	17	26	28	34	35	34	29	28	33	32	37	35	34	30	31	28	24	38	41	28	33	28	24	28	17	25	16	28
	TRUE	Empty	Prostatic spermine-binding protein OS=Rattus norvegicus GN=Sbp PE=1 SV=1	SPBP_RAT	31 kDa		0.014	CON low, D13 low, D21 high	30	31	11	9	12	5	15	10	23	16	27	19	8	14	26	20	29	24	48	43	42	34	17	13	39	42	26	28	23	26	5	5	19	19	24	16	34	34	31	25	34
	TRUE	Empty	Dipeptidyl peptidase 4 OS=Rattus norvegicus GN=Dpp4 PE=1 SV=2	DPP4_RAT	88 kDa		0.012	CON low, D13 high, D21 low	12	15	21	19	38	32	31	31	16	18	19	18	10	14	32	25	26	23	29	30	23	21	31	33	29	35	24	28	24	25	25	26	27	31	28	25	14	22	15	16	29
	TRUE	Empty	Alpha-1-acid glycoprotein OS=Rattus norvegicus GN=Orm1 PE=2 SV=1	A1AG_RAT	24 kDa		0.0015	CON high, D13 low, D21 high	31	35	20	24	29	24	27	20	32	27	36	20	44	34	30	20	25	28	16	18	20	15	12	12	20	11	21	19	23	21	25	29	23	20	28	20	35	28	31	25	25
	TRUE	Empty	Probasin OS=Rattus norvegicus GN=Pbsn PE=1 SV=1	PBAS_RAT	21 kDa		0.0018	CON low, D13 high, D21 low	39	29	21	13	15	7	11	8	5	3	17	11	10	3	8	4	6	4	21	12	112	115	53	52	17	18	69	86	23	23	19	18	37	31	80	79	15	13	10	9	9
	TRUE	Empty	Cubilin OS=Rattus norvegicus GN=Cubn PE=1 SV=2	CUBN_RAT	399 kDa		< 0.00010	CON high, D13 low, D21 low	22	32	46	49	44	55	42	46	24	26	23	31	8	20	32	29	40	46	11	14	19	17	28	22	24	26	24	17	12	19	20	25	22	24	24	18	4	7	0	3	8
	TRUE	Empty	Complement factor D OS=Rattus norvegicus GN=Cfd PE=1 SV=2	CFAD_RAT	28 kDa		0.00017	CON high, D13 low, D21 high	31	33	26	23	35	38	25	27	26	34	30	28	36	44	21	23	27	23	19	19	25	18	21	25	18	15	18	19	19	16	27	24	14	13	26	21	35	34	31	30	28
	TRUE	Empty	Regenerating islet-derived protein 3-gamma OS=Rattus norvegicus GN=Reg3g PE=1 SV=1	REG3G_RAT	19 kDa		0.12	[]	21	17	10	13	16	15	53	55	60	54	37	31	16	9	16	18	8	11	16	19	17	23	24	24	25	28	18	24	22	23	23	26	17	19	22	19	39	44	25	33	30
	TRUE	Empty	Meprin A subunit beta OS=Rattus norvegicus GN=Mep1b PE=1 SV=3	MEP1B_RAT	79 kDa		0.84	[]	28	24	19	24	21	21	27	29	29	33	19	17	34	23	20	23	33	32	31	28	31	23	31	28	27	19	28	23	23	25	27	21	25	18	29	24	28	27	25	22	28
	TRUE	Empty	Neprilysin OS=Rattus norvegicus GN=Mme PE=1 SV=2	NEP_RAT	86 kDa		0.058	[]	11	17	19	19	17	17	47	38	26	28	21	22	20	16	23	28	36	35	34	32	29	26	21	22	34	35	33	37	25	25	23	17	30	30	20	23	15	11	19	14	25
	TRUE	Empty	Complement C3 OS=Rattus norvegicus GN=C3 PE=1 SV=3	CO3_RAT	186 kDa		0.0071	CON high, D13 low, D21 low	25	23	47	47	35	38	20	24	14	12	39	46	8	8	43	36	32	25	19	16	23	17	7	8	40	34	12	9	17	15	11	12	18	17	13	14	10	15	6	10	16
	TRUE	Empty	Superoxide dismutase [Cu-Zn] OS=Rattus norvegicus GN=Sod1 PE=1 SV=2	SODC_RAT	16 kDa		0.00048	CON low, D13 low, D21 high	20	19	18	18	14	16	30	22	25	26	20	22	32	33	16	13	20	13	18	20	16	10	16	14	16	19	17	14	17	14	18	15	19	22	16	18	31	33	49	42	26
	TRUE	Empty	Carboxypeptidase Q OS=Rattus norvegicus GN=Cpq PE=1 SV=1	CBPQ_RAT	52 kDa		0.15	[]	22	24	24	25	26	26	21	15	19	19	17	19	16	23	20	19	13	17	18	19	24	18	27	25	25	23	25	26	18	21	24	24	22	19	24	23	28	29	22	34	21
	TRUE	Empty	Pancreatic alpha-amylase OS=Rattus norvegicus GN=Amy2 PE=2 SV=2	AMYP_RAT	57 kDa		0.014	CON high, D13 high, D21 low	8	6	34	29	29	30	28	25	15	16	24	18	38	23	32	26	35	33	21	18	20	18	35	36	18	19	19	26	17	16	31	25	22	19	16	19	13	15	18	16	21
	TRUE	Empty	CD48 antigen OS=Rattus norvegicus GN=Cd48 PE=1 SV=1	CD48_RAT	28 kDa		0.07	[]	32	34	21	21	26	24	17	17	28	28	28	23	38	39	23	23	20	19	22	19	18	15	19	20	13	16	26	25	24	22	22	20	15	22	23	18	34	27	25	21	21
	TRUE	Empty	Cystatin-related protein 2 OS=Rattus norvegicus GN=Crp2 PE=2 SV=1	22P2_RAT	21 kDa	TRUE	0.076	[]	34	26	14	12	10	8	20	15	19	20	26	17	8	9	29	23	29	22	40	43	36	26	19	20	35	32	33	32	32	23	10	7	32	32	23	22	20	15	25	23	28
	TRUE	Empty	Cystatin-C OS=Rattus norvegicus GN=Cst3 PE=1 SV=2	CYTC_RAT	15 kDa		< 0.00010	CON low, D13 low, D21 high	15	22	16	13	20	14	13	20	31	30	16	17	24	20	19	18	17	18	22	21	16	14	17	17	17	19	22	24	16	22	14	16	18	14	24	19	28	42	28	44	30
	TRUE	Empty	Cathepsin B OS=Rattus norvegicus GN=Ctsb PE=1 SV=2	CATB_RAT	37 kDa		0.051	[]	17	20	17	19	22	23	15	19	25	23	18	21	26	17	14	25	19	21	21	28	24	22	23	27	27	19	21	18	28	23	28	20	20	18	25	19	17	16	19	16	23
	TRUE	Empty	Gamma-glutamyltranspeptidase 1 OS=Rattus norvegicus GN=Ggt1 PE=1 SV=4	GGT1_RAT	62 kDa		0.4	[]	21	18	12	8	18	15	29	25	20	17	18	13	34	30	18	14	22	14	24	22	15	17	21	19	38	28	20	18	20	15	25	24	25	25	25	23	29	21	22	20	25
	TRUE	Empty	Na(+)/H(+) exchange regulatory cofactor NHE-RF3 OS=Rattus norvegicus GN=Pdzk1 PE=1 SV=2	NHRF3_RAT	57 kDa		0.44	[]	11	13	7	8	11	15	39	33	31	26	10	8	22	20	17	20	21	24	20	30	16	17	19	23	26	29	19	22	22	21	25	33	20	18	27	20	10	13	12	17	23
	TRUE	Empty	Granulins OS=Rattus norvegicus GN=Grn PE=1 SV=3	GRN_RAT	63 kDa		0.0032	CON low, D13 low, D21 high	28	20	14	16	23	20	16	15	20	17	21	15	53	31	31	17	18	17	20	20	19	18	19	15	16	13	18	14	10	13	17	20	14	13	22	14	24	32	43	34	26
	TRUE	Empty	Serum amyloid P-component OS=Rattus norvegicus GN=Apcs PE=2 SV=2	SAMP_RAT	26 kDa		< 0.00010	CON high, D13 low, D21 high	23	23	26	29	25	25	18	20	28	27	26	27	30	34	21	25	25	22	17	14	19	15	16	18	15	12	13	13	14	19	10	8	15	15	15	18	24	26	27	39	26
	TRUE	Empty	Prosaposin OS=Rattus norvegicus GN=Psap PE=1 SV=1	SAP_RAT	61 kDa		0.0015	CON low, D13 low, D21 high	28	23	18	19	21	23	12	20	15	17	14	18	36	34	16	12	13	19	26	18	14	15	14	15	14	22	14	18	14	18	18	16	10	11	18	20	28	31	34	39	28
	TRUE	Empty	Corticosteroid-binding globulin OS=Rattus norvegicus GN=Serpina6 PE=1 SV=2	CBG_RAT	45 kDa		0.00011	CON high, D13 low, D21 low	22	17	27	25	40	34	18	19	19	26	32	35	20	14	27	28	28	29	17	14	17	13	17	24	11	6	13	15	20	25	25	17	15	15	14	14	10	10	7	12	15
	TRUE	Empty	Nucleobindin-1 OS=Rattus norvegicus GN=Nucb1 PE=1 SV=1	NUCB1_RAT	54 kDa		0.64	[]	47	47	15	19	15	22	11	10	18	17	15	19	28	28	8	12	16	13	35	32	14	21	17	14	15	9	20	18	20	18	13	13	12	12	21	15	42	36	16	20	18
	TRUE	Empty	Fetuin-B OS=Rattus norvegicus GN=Fetub PE=2 SV=2	FETUB_RAT	42 kDa		0.00041	CON high, D13 low, D21 low	39	35	28	31	25	20	14	14	24	19	27	22	32	30	33	29	29	21	13	13	15	10	11	12	13	13	14	16	14	13	17	17	17	21	22	24	14	16	13	20	13
	TRUE	Empty	Sulfhydryl oxidase 1 OS=Rattus norvegicus GN=Qsox1 PE=1 SV=1	QSOX1_RAT	82 kDa		0.012	CON high, D13 high, D21 low	5	4	22	22	15	15	32	25	10	11	33	29	0	3	26	26	53	47	21	14	17	16	19	17	15	17	23	20	19	19	15	14	34	30	14	10	4	2	1	1	12
	TRUE	Empty	Clusterin OS=Rattus norvegicus GN=Clu PE=1 SV=2	CLUS_RAT	51 kDa		0.25	[]	22	26	19	15	15	13	12	12	23	18	15	13	36	23	19	17	12	14	24	24	18	20	11	16	25	20	17	18	25	24	14	14	20	20	11	15	22	20	15	22	14
	TRUE	Empty	Haptoglobin OS=Rattus norvegicus GN=Hp PE=1 SV=3	HPT_RAT	39 kDa		0.00036	CON low, D13 low, D21 high	20	19	21	13	12	10	11	8	12	10	15	17	18	25	17	14	14	14	25	14	17	18	19	13	15	9	9	12	15	19	18	18	17	11	20	16	24	17	21	25	20
	TRUE	Empty	Cluster of Carboxylesterase 1C OS=Rattus norvegicus GN=Ces1c PE=1 SV=3 (EST1C_RAT)	EST1C_RAT [4]	60 kDa	TRUE	0.24	[]	15	11	29	29	20	25	15	16	13	13	20	23	10	11	22	20	19	20	12	10	31	22	18	19	12	18	15	12	16	21	20	19	12	14	15	15	7	12	19	21	14
	TRUE	Empty	Ig kappa chain C region, A allele OS=Rattus norvegicus PE=1 SV=1	KACA_RAT	12 kDa	TRUE	0.67	[]	170	198	102	119	176	200	118	128	192	201	149	157	49	50	130	141	118	138	142	154	101	114	143	150	101	113	200	203	128	144	137	139	98	105	131	146	190	213	71	85	131
	TRUE	Empty	Na(+)/H(+) exchange regulatory cofactor NHE-RF1 OS=Rattus norvegicus GN=Slc9a3r1 PE=1 SV=3	NHRF1_RAT	39 kDa		0.13	[]	18	17	6	4	9	8	23	23	25	25	7	7	34	33	13	13	14	13	15	18	16	12	15	12	17	22	12	15	9	14	19	21	22	28	10	16	25	23	24	18	19
	TRUE	Empty	EGF-containing fibulin-like extracellular matrix protein 1 OS=Rattus norvegicus GN=Efemp1 PE=1 SV=1	FBLN3_RAT	55 kDa		0.0002	CON high, D13 low, D21 low	22	17	21	23	25	22	22	17	20	16	23	22	14	25	23	16	28	24	22	19	15	16	19	21	15	15	14	18	15	18	18	14	10	12	19	19	15	16	9	12	14
	TRUE	Empty	Alpha-enolase OS=Rattus norvegicus GN=Eno1 PE=1 SV=4	ENOA_RAT	47 kDa	TRUE	0.024	CON high, D13 high, D21 low	22	12	11	14	19	14	36	32	19	18	19	14	24	25	26	26	19	22	29	21	21	18	23	23	29	25	18	17	18	14	32	27	26	27	20	20	15	16	12	20	16
	TRUE	Empty	Prothrombin OS=Rattus norvegicus GN=F2 PE=1 SV=1	THRB_RAT	70 kDa		< 0.00010	CON high, D13 low, D21 high	27	28	23	19	22	16	16	14	20	17	24	18	26	26	22	20	23	18	12	11	15	11	15	10	10	11	15	13	15	10	18	11	13	13	13	13	28	21	24	16	20
	TRUE	Empty	WAP four-disulfide core domain protein 2 OS=Rattus norvegicus GN=Wfdc2 PE=2 SV=1	WFDC2_RAT	17 kDa		0.15	[]	23	19	14	13	19	14	15	12	21	20	25	15	36	25	15	11	17	17	20	17	20	17	17	19	15	20	17	16	22	13	15	12	17	15	15	15	25	27	21	23	22
	TRUE	Empty	Gamma-interferon-inducible lysosomal thiol reductase OS=Rattus norvegicus GN=Ifi30 PE=2 SV=1	GILT_RAT	28 kDa		0.047	CON high, D13 low, D21 high	22	21	18	15	25	20	14	14	18	20	18	18	20	23	22	20	19	13	20	14	17	15	17	15	15	13	17	14	18	13	14	17	17	16	12	17	22	26	24	27	19
	TRUE	Empty	Gamma-glutamyl hydrolase OS=Rattus norvegicus GN=Ggh PE=1 SV=1	GGH_RAT	36 kDa		0.18	[]	22	24	14	13	17	12	14	12	16	14	16	12	26	20	19	15	15	14	18	14	10	11	15	11	15	14	15	13	19	16	14	12	17	15	16	11	18	18	10	17	11
	TRUE	Empty	Lysosomal alpha-glucosidase OS=Rattus norvegicus GN=Gaa PE=2 SV=1	LYAG_RAT	106 kDa		0.00059	CON high, D13 low, D21 low	18	19	24	26	21	23	11	16	22	22	19	19	18	23	14	17	17	18	10	17	12	14	15	20	14	18	9	20	17	19	10	10	16	19	18	15	14	15	13	18	9
	TRUE	Empty	Neuroplastin OS=Rattus norvegicus GN=Nptn PE=1 SV=2	NPTN_RAT	44 kDa		< 0.00010	CON high, D13 low, D21 low	28	32	17	16	21	22	13	14	28	17	18	16	34	22	15	17	16	16	10	11	9	7	10	8	6	7	10	9	6	9	10	12	9	12	11	14	14	13	13	16	16
	TRUE	Empty	Junctional adhesion molecule A OS=Rattus norvegicus GN=F11r PE=1 SV=1	JAM1_RAT	32 kDa		0.0056	CON high, D13 low, D21 low	22	26	17	21	21	21	13	11	24	18	19	18	14	14	18	15	20	23	16	15	11	11	19	12	11	10	16	13	20	11	17	13	18	14	18	12	21	15	15	17	19
	TRUE	Empty	Dipeptidyl peptidase 2 OS=Rattus norvegicus GN=Dpp7 PE=1 SV=1	DPP2_RAT	55 kDa		0.00048	CON high, D13 high, D21 low	9	11	16	14	16	20	15	13	16	14	20	11	14	14	18	16	16	13	12	11	16	16	12	12	10	11	15	13	11	12	14	13	17	15	15	13	11	10	12	10	11
	TRUE	Empty	Apolipoprotein E OS=Rattus norvegicus GN=Apoe PE=1 SV=2	APOE_RAT	36 kDa		0.11	[]	12	14	9	10	19	18	11	10	14	13	18	16	24	23	10	14	17	13	17	18	19	16	19	19	11	15	15	15	16	14	19	18	18	16	14	14	14	11	13	14	15
	TRUE	Empty	Beta-2-microglobulin OS=Rattus norvegicus GN=B2m PE=1 SV=1	B2MG_RAT	14 kDa		< 0.00010	CON low, D13 low, D21 high	10	5	10	8	10	8	12	9	15	14	11	12	16	16	12	14	14	14	9	8	11	11	11	11	14	12	11	15	11	10	15	12	11	13	8	11	20	21	18	16	20
	TRUE	Empty	Di-N-acetylchitobiase OS=Rattus norvegicus GN=Ctbs PE=1 SV=1	DIAC_RAT	42 kDa		< 0.00010	CON high, D13 low, D21 low	20	16	19	17	19	17	11	15	20	21	18	16	14	19	18	18	15	14	10	12	11	14	12	14	11	16	16	13	12	13	19	16	11	12	12	13	14	13	12	12	11
	TRUE	Empty	Cluster of Heat shock cognate 71 kDa protein OS=Rattus norvegicus GN=Hspa8 PE=1 SV=1 (HSP7C_RAT)	HSP7C_RAT [2]	71 kDa	TRUE	0.00045	CON high, D13 high, D21 low	21	9	12	13	15	14	24	24	16	19	15	14	10	12	22	18	19	18	13	20	14	10	13	14	22	22	22	13	17	13	15	23	22	21	11	11	3	5	4	8	12
	TRUE	Empty	Cathepsin D OS=Rattus norvegicus GN=Ctsd PE=1 SV=1	CATD_RAT	45 kDa		< 0.00010	CON low, D13 high, D21 low	8	8	16	15	9	14	13	12	7	9	17	13	0	5	14	14	13	16	21	19	14	19	13	17	16	20	14	14	27	17	13	16	21	24	18	13	8	13	12	10	12
	TRUE	Empty	Galectin-3-binding protein OS=Rattus norvegicus GN=Lgals3bp PE=1 SV=2	LG3BP_RAT	64 kDa		< 0.00010	CON high, D13 high, D21 low	14	14	15	16	23	18	15	13	13	14	16	13	18	16	18	14	19	14	17	17	14	11	13	10	16	19	20	15	18	17	10	13	14	19	16	19	10	11	10	8	12
	TRUE	Empty	Lysosomal acid phosphatase OS=Rattus norvegicus GN=Acp2 PE=1 SV=1	PPAL_RAT	48 kDa		< 0.00010	CON high, D13 low, D21 low	17	15	18	16	18	21	14	14	18	17	19	15	14	19	21	15	19	23	13	8	10	7	13	8	6	7	9	12	11	8	14	8	14	8	11	9	11	7	6	8	9
	TRUE	Empty	Osteopontin OS=Rattus norvegicus GN=Spp1 PE=1 SV=2	OSTP_RAT	35 kDa		0.0069	CON high, D13 low, D21 high	18	16	10	12	20	14	4	6	9	9	16	16	38	26	12	8	12	7	8	6	7	7	8	5	10	6	5	4	10	8	1	3	3	5	15	15	15	22	18	20	12
	TRUE	Empty	C-reactive protein OS=Rattus norvegicus GN=Crp PE=1 SV=1	CRP_RAT	25 kDa		0.021	CON high, D13 high, D21 low	10	9	22	25	21	30	11	14	11	8	12	16	0	3	15	13	15	10	13	15	15	9	13	14	13	11	19	16	15	17	9	15	17	12	12	6	4	2	6	4	8
	TRUE	Empty	Ceruloplasmin OS=Rattus norvegicus GN=Cp PE=1 SV=3	CERU_RAT	121 kDa		0.051	[]	2	4	28	25	19	15	13	14	8	6	25	16	8	6	19	17	18	16	8	12	17	19	13	14	11	10	12	12	15	19	15	13	12	13	13	12	7	5	15	8	9
	TRUE	Empty	Endothelial cell-selective adhesion molecule OS=Rattus norvegicus GN=Esam PE=1 SV=1	ESAM_RAT	42 kDa		0.012	CON high, D13 low, D21 low	18	19	14	15	12	14	6	11	16	14	17	13	18	11	11	12	15	11	12	10	8	9	9	10	9	6	13	13	14	8	8	12	12	10	11	9	15	15	9	8	13
	TRUE	Empty	Cluster of Keratin, type I cytoskeletal 10 OS=Rattus norvegicus GN=Krt10 PE=3 SV=1 (K1C10_RAT)	K1C10_RAT [8]	57 kDa	TRUE	0.42	[]	17	8	8	7	7	5	5	4	11	9	6	4	28	26	8	7	9	5	13	7	12	12	9	6	9	4	4	9	11	13	11	7	7	8	9	9	15	18	9	12	12
	TRUE	Empty	Beta-2-glycoprotein 1 OS=Rattus norvegicus GN=Apoh PE=2 SV=2	APOH_RAT	33 kDa		0.00016	CON high, D13 low, D21 high	22	24	14	13	11	14	11	9	17	14	15	16	30	23	14	14	14	13	7	8	9	8	7	7	11	6	6	5	9	6	8	8	5	8	9	6	18	18	18	16	13
	TRUE	Empty	Cluster of Keratin, type II cytoskeletal 1 OS=Rattus norvegicus GN=Krt1 PE=2 SV=1 (K2C1_RAT)	K2C1_RAT [6]	65 kDa	TRUE	0.49	[]	12	17	7	12	6	10	7	10	34	36	9	9	32	39	4	7	7	7	13	19	18	23	10	10	12	9	8	5	10	20	8	13	11	9	16	16	21	26	18	21	19
	TRUE	Empty	Chondroitin sulfate proteoglycan 4 OS=Rattus norvegicus GN=Cspg4 PE=1 SV=2	CSPG4_RAT	252 kDa		< 0.00010	CON high, D13 low, D21 low	12	19	26	23	18	18	10	12	23	19	9	16	4	8	24	20	13	15	8	11	14	12	9	14	3	3	16	10	2	7	8	9	11	11	10	11	4	6	1	9	5
	TRUE	Empty	Dipeptidyl peptidase 1 OS=Rattus norvegicus GN=Ctsc PE=1 SV=3	CATC_RAT	52 kDa		0.0054	CON high, D13 high, D21 low	15	9	14	16	15	15	14	10	10	15	7	9	8	17	11	15	10	15	17	14	15	10	14	8	10	12	15	12	8	13	8	8	13	9	10	18	11	12	7	9	12
	TRUE	Empty	Beta-microseminoprotein OS=Rattus norvegicus GN=Msmb PE=1 SV=1	MSMB_RAT	13 kDa		0.029	CON low, D13 high, D21 low	16	12	14	10	3	5	4	6	6	7	3	10	2	3	9	14	9	11	2	8	34	32	23	15	10	7	23	27	8	15	11	13	17	16	27	28	4	7	10	12	4
	TRUE	Empty	Beta-glucuronidase OS=Rattus norvegicus GN=Gusb PE=2 SV=1	BGLR_RAT	75 kDa		0.0073	CON low, D13 high, D21 high	0	0	6	4	1	2	1	2	1	2	5	6	2	2	8	11	2	0	17	17	0	0	5	8	15	13	4	5	11	13	19	18	15	14	10	12	4	0	12	12	5
	TRUE	Empty	Biotinidase OS=Rattus norvegicus GN=Btd PE=2 SV=1	BTD_RAT	58 kDa		0.0022	CON high, D13 high, D21 low	10	12	18	13	17	15	14	11	12	10	11	14	2	3	16	12	14	14	16	15	14	12	12	12	9	7	17	8	15	9	10	12	9	11	11	9	6	7	9	5	14
	TRUE	Empty	Prostatic steroid-binding protein C2 OS=Rattus norvegicus GN=Psbpc2 PE=1 SV=1	PSC2_RAT	13 kDa		0.036	CON low, D13 high, D21 high	10	10	6	6	5	3	8	8	10	7	11	13	6	3	13	10	14	18	16	19	17	11	11	8	22	17	15	19	12	17	4	7	14	14	15	11	7	9	9	12	14
	TRUE	Empty	Transthyretin OS=Rattus norvegicus GN=Ttr PE=1 SV=1	TTHY_RAT	16 kDa		0.0027	CON high, D13 low, D21 high	19	23	12	12	13	15	5	4	11	11	16	14	12	14	9	12	7	8	6	7	6	8	8	9	5	4	6	5	9	7	6	7	5	5	7	8	13	7	18	12	12
	TRUE	Empty	Ezrin OS=Rattus norvegicus GN=Ezr PE=1 SV=3	EZRI_RAT	69 kDa	TRUE	0.024	CON low, D13 high, D21 low	15	17	10	9	12	11	21	28	16	21	11	15	8	11	15	15	20	17	25	27	16	17	18	14	31	27	27	26	18	18	18	25	25	30	20	18	14	10	10	10	23
	TRUE	Empty	Complement C4 OS=Rattus norvegicus GN=C4 PE=1 SV=3	CO4_RAT	192 kDa		0.019	CON low, D13 low, D21 high	7	7	10	8	6	9	13	16	9	10	5	8	8	11	4	6	7	8	8	13	9	9	6	7	14	12	6	8	5	7	4	6	2	2	10	5	18	18	16	17	11
	TRUE	Empty	Glutamate--cysteine ligase catalytic subunit OS=Rattus norvegicus GN=Gclc PE=1 SV=2	GSH1_RAT	73 kDa		0.062	[]	0	1	2	2	4	5	27	24	10	7	1	2	2	5	5	8	8	9	8	14	7	12	13	13	25	22	9	13	11	11	17	20	13	14	10	10	10	7	6	7	12
	TRUE	Empty	Retinoid-inducible serine carboxypeptidase OS=Rattus norvegicus GN=Scpep1 PE=2 SV=1	RISC_RAT	51 kDa		0.025	CON low, D13 high, D21 high	9	7	8	9	11	9	7	8	7	7	10	8	6	8	10	10	11	8	13	10	15	9	14	11	7	7	9	13	11	9	10	11	9	12	9	8	11	9	12	8	11
	TRUE	Empty	Phosphatidylethanolamine-binding protein 1 OS=Rattus norvegicus GN=Pebp1 PE=1 SV=3	PEBP1_RAT	21 kDa		0.27	[]	10	9	6	5	6	8	9	10	8	9	6	9	10	12	8	10	11	10	9	15	5	7	10	11	19	21	14	13	8	11	6	8	11	16	8	8	11	11	4	4	9
	TRUE	Empty	Seminal vesicle secretory protein 2 OS=Rattus norvegicus GN=Svs2 PE=1 SV=1	SVS2_RAT	46 kDa		< 0.00010	CON low, D13 low, D21 high	9	9	7	9	3	3	1	4	2	2	8	11	2	2	5	6	9	8	6	5	7	5	16	8	4	5	4	8	6	9	1	1	4	3	20	27	10	7	16	16	23
	TRUE	Empty	Attractin OS=Rattus norvegicus GN=Atrn PE=2 SV=1	ATRN_RAT	159 kDa		0.028	CON high, D13 low, D21 low	14	14	12	8	13	11	11	8	10	11	8	10	10	9	7	10	14	12	8	10	5	7	9	7	8	5	8	9	8	8	6	7	12	9	5	13	7	9	4	7	9
	TRUE	Empty	Triosephosphate isomerase OS=Rattus norvegicus GN=Tpi1 PE=1 SV=2	TPIS_RAT	27 kDa		0.15	[]	11	7	6	7	8	7	13	11	11	10	6	4	18	16	10	11	7	8	17	12	10	9	10	8	16	13	9	10	11	9	15	10	11	11	11	8	4	7	3	8	8
	TRUE	Empty	Sialate O-acetylesterase OS=Rattus norvegicus GN=Siae PE=1 SV=2	SIAE_RAT	60 kDa		0.013	CON low, D13 low, D21 high	12	13	9	7	14	10	6	5	10	12	10	13	10	12	8	7	5	5	8	9	6	9	10	7	8	6	9	10	11	10	6	7	8	6	7	9	15	12	13	13	11
	TRUE	Empty	Copper transport protein ATOX1 OS=Rattus norvegicus GN=Atox1 PE=1 SV=1	ATOX1_RAT	7 kDa		0.052	[]	15	21	10	8	10	13	6	4	13	17	16	8	16	12	6	10	8	11	11	14	6	5	7	8	7	6	12	9	8	7	4	6	6	7	8	8	13	15	19	10	11
	TRUE	Empty	Cluster of Glyceraldehyde-3-phosphate dehydrogenase OS=Rattus norvegicus GN=Gapdh PE=1 SV=3 (G3P_RAT)	G3P_RAT [2]	36 kDa	TRUE	0.082	[]	10	6	6	7	7	6	13	12	10	9	6	7	4	6	10	7	11	10	7	11	7	8	8	8	12	9	8	10	7	7	6	11	17	14	11	10	6	5	6	7	8
	TRUE	Empty	Moesin OS=Rattus norvegicus GN=Msn PE=1 SV=3	MOES_RAT	68 kDa	TRUE	0.02	CON low, D13 high, D21 low	10	12	7	8	7	11	26	32	20	18	7	13	10	16	14	14	17	14	16	26	16	21	20	18	30	24	21	21	16	22	19	30	31	21	18	15	13	12	9	10	18
	TRUE	Empty	Prostaglandin-H2 D-isomerase OS=Rattus norvegicus GN=Ptgds PE=1 SV=2	PTGDS_RAT	21 kDa		0.68	[]	11	11	5	4	5	6	7	7	9	11	6	6	16	11	5	8	8	6	7	8	8	9	8	9	8	9	5	7	8	10	6	8	9	7	12	12	7	13	1	5	6
	TRUE	Empty	6-phosphogluconolactonase OS=Rattus norvegicus GN=Pgls PE=1 SV=1	6PGL_RAT	27 kDa		0.0005	CON high, D13 high, D21 low	7	6	16	13	18	17	11	9	8	13	12	14	2	6	12	13	19	20	9	11	10	11	13	10	12	7	13	18	8	8	5	11	12	11	9	11	6	5	3	4	6
	TRUE	Empty	Cathepsin L1 OS=Rattus norvegicus GN=Ctsl PE=1 SV=2	CATL1_RAT	38 kDa		0.00021	CON high, D13 low, D21 low	18	18	12	10	15	10	8	6	17	17	9	6	24	19	11	10	11	5	10	6	6	5	2	3	3	6	7	3	6	4	4	4	7	4	7	4	7	9	12	5	8
	TRUE	Empty	Prostatic glandular kallikrein-6 OS=Rattus norvegicus GN=Klk6 PE=3 SV=1	KLK6_RAT	29 kDa	TRUE	0.0034	CON low, D13 high, D21 high	21	18	7	8	13	7	8	7	16	16	19	14	16	14	17	15	19	20	27	26	16	15	14	14	17	15	26	31	29	26	11	12	21	18	25	22	21	20	27	22	19
	TRUE	Empty	Fructose-bisphosphate aldolase B OS=Rattus norvegicus GN=Aldob PE=1 SV=2	ALDOB_RAT	40 kDa	TRUE	0.048	CON low, D13 high, D21 low	7	5	4	4	4	8	15	16	12	11	6	4	2	2	6	8	5	9	10	12	9	7	13	12	13	14	9	10	8	9	11	21	11	10	9	7	6	7	1	8	9
	TRUE	Empty	Aminoacylase-1A OS=Rattus norvegicus GN=Acy1a PE=1 SV=1	ACY1A_RAT	46 kDa		0.18	[]	5	6	3	3	4	3	14	14	9	6	1	4	2	6	5	7	8	7	12	11	3	5	4	4	9	11	7	10	1	4	14	14	8	13	8	7	8	9	9	3	11
	TRUE	Empty	Seminal vesicle secretory protein 4 OS=Rattus norvegicus GN=Svs4 PE=1 SV=1	SVS4_RAT	12 kDa		0.32	[]	2	0	13	12	1	0	1	1	0	0	14	23	0	0	0	2	68	77	4	2	1	0	0	0	0	0	0	0	1	1	0	0	3	4	1	1	0	0	0	0	62
	TRUE	Empty	Cadherin-2 OS=Rattus norvegicus GN=Cdh2 PE=1 SV=1	CADH2_RAT	100 kDa		0.0049	CON high, D13 low, D21 low	10	14	7	10	10	12	6	6	7	10	5	10	20	16	7	9	9	11	9	6	7	8	9	10	5	4	6	9	5	7	5	7	8	9	9	7	4	2	1	4	4
	TRUE	Empty	Follistatin-related protein 1 OS=Rattus norvegicus GN=Fstl1 PE=1 SV=1	FSTL1_RAT	35 kDa		0.021	CON high, D13 low, D21 high	17	14	10	9	11	10	4	7	13	9	6	6	14	17	8	11	11	8	3	7	1	4	6	9	4	8	9	5	5	6	3	2	6	9	9	9	7	12	7	9	4
	TRUE	Empty	Serine protease inhibitor A3N OS=Rattus norvegicus GN=Serpina3n PE=1 SV=3	SPA3N_RAT	47 kDa	TRUE	0.00072	CON high, D13 low, D21 low	6	10	18	12	15	10	9	8	8	10	16	14	10	8	13	13	12	13	7	7	8	11	9	8	10	9	8	9	9	7	9	11	12	7	9	10	4	6	3	7	2
	TRUE	Empty	Cluster of Calbindin OS=Rattus norvegicus GN=Calb1 PE=1 SV=2 (CALB1_RAT)	CALB1_RAT [2]	30 kDa	TRUE	< 0.00010	CON high, D13 low, D21 high	11	11	10	11	15	17	9	8	10	10	19	20	16	9	14	15	18	19	0	1	0	2	2	1	0	0	1	0	0	1	0	0	0	0	3	1	11	9	4	5	18
	TRUE	Empty	Ig gamma-2A chain C region OS=Rattus norvegicus GN=Igg-2a PE=1 SV=1	IGG2A_RAT	35 kDa	TRUE	0.94	[]	16	22	14	13	8	8	11	6	14	13	7	10	12	8	21	17	7	5	8	11	7	8	18	19	8	6	16	19	14	15	6	11	12	14	7	12	11	21	3	10	12
	TRUE	Empty	Peptidyl-prolyl cis-trans isomerase A OS=Rattus norvegicus GN=Ppia PE=1 SV=2	PPIA_RAT	18 kDa		0.6	[]	7	7	4	3	6	5	11	9	13	10	5	6	6	12	9	7	6	8	11	10	8	5	6	9	9	9	6	7	5	8	9	11	10	10	7	6	7	7	4	7	9
	TRUE	Empty	Interleukin-4 receptor subunit alpha OS=Rattus norvegicus GN=Il4r PE=2 SV=2	IL4RA_RAT	87 kDa		0.00086	CON high, D13 high, D21 low	11	14	11	10	10	10	8	7	11	13	10	8	12	8	12	11	7	8	10	8	14	7	9	10	6	6	11	9	10	7	9	7	10	9	7	9	8	6	7	7	5
	TRUE	Empty	Nidogen-1 (Fragment) OS=Rattus norvegicus GN=Nid1 PE=1 SV=2	NID1_RAT	36 kDa		< 0.00010	CON high, D13 low, D21 low	11	13	14	10	10	9	8	7	10	10	10	11	10	9	11	8	11	11	10	10	8	6	9	8	5	4	7	8	6	8	6	5	9	5	9	7	7	9	6	7	6
	TRUE	Empty	Multiple inositol polyphosphate phosphatase 1 OS=Rattus norvegicus GN=Minpp1 PE=1 SV=3	MINP1_RAT	55 kDa		0.0039	CON high, D13 high, D21 low	9	6	13	13	11	11	6	9	7	7	7	4	0	0	12	11	9	11	13	9	11	10	9	8	5	7	10	14	3	5	8	6	7	9	8	6	4	7	3	3	7
	TRUE	Empty	Prolactin-inducible protein homolog OS=Rattus norvegicus GN=Pip PE=2 SV=1	PIP_RAT	16 kDa		0.14	[]	9	8	8	7	7	8	7	7	8	7	8	6	20	12	4	3	9	8	7	7	5	7	5	5	5	4	6	8	6	7	8	7	3	3	8	6	10	7	10	9	7
	TRUE	Empty	Basal cell adhesion molecule OS=Rattus norvegicus GN=Bcam PE=2 SV=1	BCAM_RAT	68 kDa		< 0.00010	CON high, D13 low, D21 low	9	10	9	10	6	12	8	6	11	14	14	11	16	16	11	7	9	9	6	7	5	5	5	7	5	5	6	8	6	6	5	8	6	6	5	4	8	5	0	5	4
	TRUE	Empty	Ribonuclease 4 OS=Rattus norvegicus GN=Rnase4 PE=1 SV=1	RNAS4_RAT	17 kDa		0.00023	CON low, D13 low, D21 high	3	8	9	6	5	5	5	6	6	6	2	8	16	12	4	5	1	2	9	7	9	7	6	7	6	7	3	7	8	8	10	9	4	4	10	11	15	13	19	17	11
	TRUE	Empty	Aggrecan core protein OS=Rattus norvegicus GN=Acan PE=1 SV=2	PGCA_RAT	221 kDa	TRUE	< 0.00010	CON high, D13 low, D21 low	16	23	10	13	9	14	6	9	16	18	8	10	10	9	7	10	8	11	2	4	2	2	2	4	2	2	2	2	1	1	1	3	2	4	6	5	4	4	3	1	5
	TRUE	Empty	CD166 antigen OS=Rattus norvegicus GN=Alcam PE=1 SV=1	CD166_RAT	65 kDa		< 0.00010	CON high, D13 low, D21 low	14	17	8	13	11	10	4	9	11	15	7	9	16	19	8	8	8	11	3	5	1	3	4	5	4	3	6	7	3	4	4	5	5	7	7	6	3	7	0	1	2
	TRUE	Empty	Ubiquitin-60S ribosomal protein L40 OS=Rattus norvegicus GN=Uba52 PE=1 SV=2	RL40_RAT (+3)	15 kDa		0.0011	CON low, D13 high, D21 high	7	3	5	3	5	4	7	13	5	6	3	4	8	8	4	4	4	5	7	8	6	9	7	8	7	13	7	6	7	7	8	13	6	7	12	8	7	10	9	14	7
	TRUE	Empty	Extracellular superoxide dismutase [Cu-Zn] OS=Rattus norvegicus GN=Sod3 PE=1 SV=2	SODE_RAT	27 kDa		0.00012	CON high, D13 low, D21 high	11	14	9	11	11	10	8	9	11	9	6	7	8	14	6	10	11	7	7	6	3	4	5	6	4	3	4	5	6	9	5	7	5	5	6	6	10	6	10	10	8
	TRUE	Empty	Xaa-Pro aminopeptidase 2 OS=Rattus norvegicus GN=Xpnpep2 PE=1 SV=1	XPP2_RAT	?		0.45	[]	5	4	5	7	5	6	11	13	7	6	3	4	4	8	4	5	6	8	8	7	5	6	7	7	8	9	6	7	10	7	8	10	6	7	9	9	6	5	1	3	6
	TRUE	Empty	Alcohol dehydrogenase [NADP(+)] OS=Rattus norvegicus GN=Akr1a1 PE=1 SV=2	AK1A1_RAT	37 kDa		0.0013	CON low, D13 high, D21 low	2	2	4	4	5	5	16	11	5	5	8	7	2	0	4	8	6	5	12	6	7	8	15	16	9	9	9	5	6	10	11	18	12	15	7	5	0	2	0	3	4
	TRUE	Empty	L-lactate dehydrogenase B chain OS=Rattus norvegicus GN=Ldhb PE=1 SV=2	LDHB_RAT	37 kDa	TRUE	0.055	[]	6	2	7	10	8	10	22	17	2	4	5	7	2	3	8	12	11	14	8	10	7	9	10	12	9	10	8	6	7	5	6	13	6	10	10	9	3	2	4	5	5
	TRUE	Empty	CD59 glycoprotein OS=Rattus norvegicus GN=Cd59 PE=1 SV=2	CD59_RAT	14 kDa		0.098	[]	5	9	6	5	6	6	10	4	7	6	10	7	14	11	6	5	10	5	11	9	7	6	8	7	5	7	5	6	7	4	10	8	6	5	7	6	18	16	10	9	8
	TRUE	Empty	Angiotensinogen OS=Rattus norvegicus GN=Agt PE=1 SV=1	ANGT_RAT	52 kDa		0.0016	CON low, D13 high, D21 high	1	2	8	6	5	4	6	4	5	2	7	4	4	6	7	3	7	5	11	7	15	11	10	10	10	9	6	11	9	8	10	11	6	6	5	5	6	7	6	7	12
	TRUE	Empty	Alpha/beta hydrolase domain-containing protein 14B OS=Rattus norvegicus GN=Abhd14b PE=2 SV=1	ABHEB_RAT	23 kDa		0.026	CON low, D13 high, D21 low	1	1	7	6	5	7	6	7	4	6	7	4	2	3	7	6	6	8	6	7	6	7	7	10	8	5	10	10	8	7	9	10	6	6	7	12	7	5	6	3	8
	TRUE	Empty	Apolipoprotein A-IV OS=Rattus norvegicus GN=Apoa4 PE=1 SV=2	APOA4_RAT	44 kDa		< 0.00010	CON high, D13 low, D21 low	14	16	14	16	11	7	4	6	11	10	9	7	8	8	8	9	14	10	3	3	7	9	3	1	5	3	1	1	5	3	4	3	5	5	4	6	3	4	0	3	1
	TRUE	Empty	Alkaline phosphatase, tissue-nonspecific isozyme OS=Rattus norvegicus GN=Alpl PE=1 SV=2	PPBT_RAT	58 kDa		0.063	[]	8	8	4	4	4	3	9	14	11	6	3	4	10	9	7	7	5	6	8	6	3	4	5	2	11	8	5	4	5	4	4	5	6	5	5	4	10	9	4	3	6
	TRUE	Empty	Arylsulfatase B OS=Rattus norvegicus GN=Arsb PE=2 SV=2	ARSB_RAT	59 kDa		0.47	[]	4	8	3	3	6	6	6	4	8	9	3	4	0	2	6	8	2	4	6	6	6	7	7	8	5	3	7	4	2	8	4	7	3	5	2	5	7	6	7	7	5
	TRUE	Empty	Interleukin-1 receptor type 2 OS=Rattus norvegicus GN=Il1r2 PE=2 SV=1	IL1R2_RAT	46 kDa		0.15	[]	7	7	4	4	9	6	4	2	8	5	7	6	4	9	7	4	6	5	9	8	9	5	10	8	9	3	7	7	6	6	8	6	7	6	8	8	11	6	6	7	5
	TRUE	Empty	Neutrophil gelatinase-associated lipocalin OS=Rattus norvegicus GN=Lcn2 PE=1 SV=2	NGAL_RAT	22 kDa		0.69	[]	4	4	9	7	5	5	7	7	7	7	5	7	0	3	8	7	6	6	8	6	10	9	10	10	5	5	6	3	7	10	4	6	5	4	6	9	6	6	6	8	6
	TRUE	Empty	Apolipoprotein A-I OS=Rattus norvegicus GN=Apoa1 PE=1 SV=2	APOA1_RAT	30 kDa		0.015	CON high, D13 low, D21 low	27	22	10	9	10	6	4	3	7	4	7	5	14	16	5	5	6	6	4	4	2	4	2	2	4	7	1	1	7	6	3	1	5	4	1	2	8	6	1	7	4
	TRUE	Empty	Transcobalamin-2 OS=Rattus norvegicus GN=Tcn2 PE=2 SV=1	TCO2_RAT	47 kDa		0.71	[]	5	6	6	7	5	9	6	6	4	6	5	7	4	3	3	5	5	8	3	4	5	7	8	6	4	3	5	7	2	5	1	6	6	4	4	8	3	9	10	10	5
	TRUE	Empty	Odorant-binding protein OS=Rattus norvegicus GN=Obp1f PE=1 SV=1	OBP_RAT	20 kDa		0.002	CON low, D13 low, D21 high	6	8	5	7	4	3	6	8	5	6	6	7	6	6	5	6	3	5	3	5	5	4	7	7	4	3	7	8	3	5	4	6	5	4	10	7	10	15	6	9	4
	TRUE	Empty	Carbonic anhydrase 2 OS=Rattus norvegicus GN=Ca2 PE=1 SV=2	CAH2_RAT	29 kDa		0.0017	CON high, D13 high, D21 low	5	6	6	4	6	6	11	10	9	8	9	4	8	9	7	6	7	9	7	10	6	7	9	7	5	8	5	7	3	7	9	12	8	6	9	9	1	4	0	1	5
	TRUE	Empty	Interleukin-1 receptor accessory protein OS=Rattus norvegicus GN=Il1rap PE=2 SV=1	IL1AP_RAT	66 kDa		0.0074	CON high, D13 low, D21 low	9	8	7	4	7	6	4	5	8	7	5	10	6	9	4	5	6	7	7	6	5	8	4	6	3	3	2	6	3	5	5	3	4	7	4	6	3	6	3	4	1
	TRUE	Empty	CD44 antigen OS=Rattus norvegicus GN=Cd44 PE=1 SV=2	CD44_RAT	56 kDa		0.025	CON high, D13 low, D21 high	9	8	8	4	6	7	4	5	10	9	9	8	10	19	5	6	5	7	6	6	5	6	6	6	5	4	5	7	6	2	5	5	5	5	5	5	10	10	9	12	7
	TRUE	Empty	Amyloid beta A4 protein OS=Rattus norvegicus GN=App PE=1 SV=2	A4_RAT	87 kDa	TRUE	0.002	CON high, D13 low, D21 high	12	10	5	4	7	7	8	5	10	8	6	5	6	16	8	5	3	5	3	6	1	4	5	4	5	5	5	5	1	3	4	5	4	5	4	4	10	7	7	9	7
	TRUE	Empty	Protein FAM151A OS=Rattus norvegicus GN=Fam151a PE=2 SV=1	F151A_RAT	67 kDa		0.00045	CON high, D13 low, D21 low	9	7	7	5	10	10	3	6	6	11	7	9	4	9	9	8	9	10	6	6	3	5	7	7	5	7	9	5	7	4	5	4	9	5	6	6	6	4	1	1	5
	TRUE	Empty	Monocyte differentiation antigen CD14 OS=Rattus norvegicus GN=Cd14 PE=2 SV=2	CD14_RAT	40 kDa		0.00061	CON high, D13 low, D21 low	10	10	6	8	9	9	5	7	10	10	7	7	2	8	6	7	6	9	6	5	7	4	6	7	5	5	7	7	5	5	4	7	8	6	5	5	4	4	1	4	2
	TRUE	Empty	Anthrax toxin receptor 1 OS=Rattus norvegicus GN=Antxr1 PE=1 SV=2	ANTR1_RAT	62 kDa		0.0099	CON high, D13 low, D21 low	10	6	9	7	10	10	6	4	5	8	12	7	6	5	10	7	8	5	3	8	5	6	7	8	3	5	4	9	7	7	6	8	6	7	5	7	0	0	3	3	8
	TRUE	Empty	Growth arrest-specific protein 6 OS=Rattus norvegicus GN=Gas6 PE=1 SV=1	GAS6_RAT	75 kDa		0.012	CON high, D13 low, D21 low	14	8	10	12	15	14	7	7	11	10	6	9	0	5	1	2	7	6	4	2	1	7	2	4	3	3	6	9	3	3	1	3	3	4	6	6	3	7	4	5	4
	TRUE	Empty	Protein deglycase DJ-1 OS=Rattus norvegicus GN=Park7 PE=1 SV=1	PARK7_RAT	20 kDa		0.15	[]	3	4	6	4	5	3	7	9	4	6	3	4	8	6	5	4	7	3	4	4	3	3	5	5	8	5	2	8	8	2	6	6	6	5	3	3	1	5	1	3	6
	TRUE	Empty	Programmed cell death 6-interacting protein OS=Rattus norvegicus GN=Pdcd6ip PE=1 SV=2	PDC6I_RAT	97 kDa		0.0042	CON high, D13 high, D21 low	0	0	9	10	4	7	13	15	2	4	2	5	0	2	10	9	13	9	6	5	9	6	5	6	11	9	7	6	2	3	5	7	12	8	4	6	1	0	0	0	2
	TRUE	Empty	Beta-mannosidase OS=Rattus norvegicus GN=Manba PE=2 SV=1	MANBA_RAT	101 kDa		0.00058	CON low, D13 high, D21 low	1	3	9	5	8	6	4	5	6	4	3	3	2	3	4	3	7	6	7	9	6	6	7	7	10	6	7	7	5	6	6	7	8	9	6	5	3	5	1	4	1
	TRUE	Empty	Nidogen-2 OS=Rattus norvegicus GN=Nid2 PE=2 SV=1	NID2_RAT	153 kDa		< 0.00010	CON high, D13 low, D21 low	4	7	11	11	7	8	15	7	8	7	9	11	6	3	9	8	14	10	3	2	5	4	3	2	6	3	4	6	5	3	5	7	4	3	2	3	4	1	3	3	5
	TRUE	Empty	Malate dehydrogenase, cytoplasmic OS=Rattus norvegicus GN=Mdh1 PE=1 SV=3	MDHC_RAT	36 kDa		0.027	CON low, D13 high, D21 low	2	1	4	6	5	4	11	7	4	5	3	3	6	11	6	5	5	5	7	8	6	6	10	8	7	9	5	6	7	6	9	10	6	6	7	9	7	4	4	4	7
	TRUE	Empty	Pro-cathepsin H OS=Rattus norvegicus GN=Ctsh PE=1 SV=1	CATH_RAT	37 kDa		0.016	CON high, D13 low, D21 low	11	11	8	8	8	6	6	5	6	8	11	6	6	6	8	5	7	5	6	6	5	3	7	5	3	3	7	5	6	4	8	7	5	5	5	4	10	6	9	7	8
	TRUE	Empty	Beta-defensin 50 OS=Rattus norvegicus GN=Defb50 PE=3 SV=1	DFB50_RAT	8 kDa		0.0049	CON low, D13 high, D21 low	5	6	5	6	3	2	4	4	3	4	3	3	0	3	4	1	4	2	2	3	23	17	15	13	5	6	15	13	7	8	5	4	7	8	13	15	1	4	6	8	5
	TRUE	Empty	Anionic trypsin-1 OS=Rattus norvegicus GN=Prss1 PE=1 SV=1	TRY1_RAT	26 kDa		0.036	CON low, D13 low, D21 high	4	5	4	4	5	6	6	3	4	3	3	3	12	16	3	4	4	6	4	4	5	8	5	4	4	5	5	5	7	6	6	5	5	6	11	7	10	9	6	7	6
	TRUE	Empty	Protein RoBo-1 OS=Rattus norvegicus PE=1 SV=1	ROB1_RAT	26 kDa		0.0059	CON high, D13 low, D21 high	9	10	7	6	7	4	4	4	7	9	7	5	10	8	8	5	7	5	9	6	3	4	4	5	5	5	4	5	6	4	6	4	5	6	4	5	7	7	6	8	6
	TRUE	Empty	Trefoil factor 1 OS=Rattus norvegicus GN=Tff1 PE=3 SV=1	TFF1_RAT	9 kDa		0.00026	CON high, D13 low, D21 high	10	8	5	5	8	4	3	5	10	7	6	6	12	11	8	7	6	8	4	4	3	1	4	2	4	2	4	5	5	5	5	4	2	1	6	3	7	11	10	7	6
	TRUE	Empty	Thioredoxin OS=Rattus norvegicus GN=Txn PE=1 SV=2	THIO_RAT	12 kDa		0.033	CON high, D13 low, D21 high	9	7	3	1	5	5	8	7	5	9	7	6	8	6	8	5	4	5	7	6	3	3	3	3	4	5	5	5	3	6	4	5	5	4	5	4	7	5	3	5	5
	TRUE	Empty	Nucleobindin-2 OS=Rattus norvegicus GN=Nucb2 PE=1 SV=1	NUCB2_RAT	50 kDa		0.00018	CON low, D13 high, D21 high	3	3	2	1	1	2	1	0	2	5	5	1	2	3	1	2	3	2	8	9	3	6	5	2	7	6	13	8	5	10	3	4	5	5	3	5	13	10	4	3	6
	TRUE	Empty	Biglycan OS=Rattus norvegicus GN=Bgn PE=2 SV=1	PGS1_RAT	42 kDa		0.63	[]	5	4	5	4	7	9	1	2	13	17	5	4	2	3	7	4	3	5	11	8	6	6	11	7	2	2	5	9	9	8	5	6	4	5	3	5	6	4	4	5	7
	TRUE	Empty	Collectin-12 OS=Rattus norvegicus GN=Colec12 PE=2 SV=1	COL12_RAT	82 kDa		0.0011	CON low, D13 low, D21 high	2	3	0	1	0	3	1	5	5	5	1	3	6	11	0	2	4	2	2	5	2	7	7	6	4	3	2	1	6	4	3	7	2	3	3	4	8	11	7	8	4
	TRUE	Empty	Vomeromodulin (Fragment) OS=Rattus norvegicus PE=2 SV=1	VOME_RAT	11 kDa		0.012	CON high, D13 high, D21 low	1	5	14	13	5	6	7	7	7	6	14	12	0	2	7	6	4	5	3	2	5	4	7	9	5	6	10	9	7	4	3	4	4	3	6	7	1	2	1	3	2
	TRUE	Empty	Glycosylation-dependent cell adhesion molecule 1 OS=Rattus norvegicus GN=Glycam1 PE=2 SV=1	GLCM1_RAT	15 kDa		0.0094	CON low, D13 low, D21 high	6	5	4	5	5	5	7	4	4	6	8	3	8	9	5	4	4	5	7	9	5	3	4	6	5	4	5	5	5	3	9	4	6	5	6	5	15	10	7	8	8
	TRUE	Empty	Cluster of Fructose-1,6-bisphosphatase 1 OS=Rattus norvegicus GN=Fbp1 PE=1 SV=2 (F16P1_RAT)	F16P1_RAT [2]	40 kDa	TRUE	0.014	CON low, D13 high, D21 low	0	0	6	1	2	2	16	14	2	5	2	4	0	0	1	5	4	5	4	7	5	5	9	10	10	12	8	8	5	4	10	14	7	9	5	6	1	0	1	1	6
	TRUE	Empty	Apolipoprotein M OS=Rattus norvegicus GN=Apom PE=1 SV=2	APOM_RAT	22 kDa		0.48	[]	3	3	5	4	2	4	4	4	3	6	3	3	4	5	3	3	4	4	7	3	5	4	3	4	3	4	3	2	2	6	6	4	4	2	2	5	3	2	3	3	2
	TRUE	Empty	Parvalbumin alpha OS=Rattus norvegicus GN=Pvalb PE=1 SV=2	PRVA_RAT	12 kDa		< 0.00010	CON low, D13 low, D21 high	4	5	1	2	5	5	4	2	2	5	6	4	14	12	0	1	0	1	3	5	1	4	3	3	4	4	4	6	2	6	3	3	1	1	6	7	18	17	9	10	9
	TRUE	Empty	Glutathione peroxidase 3 OS=Rattus norvegicus GN=Gpx3 PE=2 SV=2	GPX3_RAT	25 kDa		0.57	[]	7	7	3	4	5	6	2	2	5	2	7	4	8	9	6	3	2	3	8	5	3	4	4	4	3	4	3	5	7	4	4	3	4	3	4	5	7	7	7	8	6
	TRUE	Empty	Plasma protease C1 inhibitor OS=Rattus norvegicus GN=Serping1 PE=2 SV=1	IC1_RAT	56 kDa		0.78	[]	6	8	4	5	4	4	3	4	4	4	2	7	4	2	7	7	2	4	3	6	6	7	4	7	5	3	3	6	7	5	3	5	7	4	3	4	4	4	1	4	2
	TRUE	Empty	Intercellular adhesion molecule 1 OS=Rattus norvegicus GN=Icam1 PE=2 SV=1	ICAM1_RAT	60 kDa		0.089	[]	7	8	6	4	4	6	1	2	8	6	5	6	8	6	4	3	7	5	8	7	2	1	2	3	2	3	3	5	5	1	5	4	2	4	1	2	8	6	3	1	5
	TRUE	Empty	Epididymal-specific lipocalin-5 OS=Rattus norvegicus GN=Lcn5 PE=1 SV=2	LCN5_RAT	21 kDa		0.034	CON low, D13 high, D21 low	7	7	4	3	0	0	6	4	4	6	0	4	0	0	1	5	12	12	7	9	7	10	5	5	15	17	11	13	9	12	0	0	12	14	0	1	0	0	0	0	2
	TRUE	Empty	Cadherin-related family member 5 OS=Rattus norvegicus GN=Cdhr5 PE=1 SV=1	CDHR5_RAT	91 kDa		0.32	[]	11	9	10	4	7	6	0	0	7	8	2	3	8	9	3	5	6	8	4	6	3	4	8	3	0	1	5	5	2	3	4	8	6	6	6	6	6	5	1	7	5
	TRUE	Empty	Glutamate--cysteine ligase regulatory subunit OS=Rattus norvegicus GN=Gclm PE=1 SV=1	GSH0_RAT	31 kDa		0.0083	CON low, D13 high, D21 low	1	1	3	2	5	3	9	9	7	3	1	4	2	5	4	5	4	3	9	5	5	3	6	6	8	10	4	5	3	5	5	8	8	5	6	6	3	5	1	3	5
	TRUE	Empty	Neogenin (Fragment) OS=Rattus norvegicus GN=Neo1 PE=1 SV=1	NEO1_RAT	151 kDa		< 0.00010	CON high, D13 low, D21 low	11	11	7	7	12	7	6	6	8	8	6	8	12	3	6	10	5	8	6	5	0	5	5	5	1	2	2	5	1	3	1	6	5	3	5	1	0	1	0	1	1
	TRUE	Empty	RT1 class I histocompatibility antigen, AA alpha chain OS=Rattus norvegicus PE=1 SV=2	HA12_RAT	42 kDa	TRUE	0.48	[]	7	10	5	8	7	8	1	2	11	11	6	8	12	16	6	7	9	6	6	6	6	6	9	6	2	3	7	5	8	6	9	4	9	4	9	9	8	9	7	7	7
	TRUE	Empty	Annexin A1 OS=Rattus norvegicus GN=Anxa1 PE=1 SV=2	ANXA1_RAT	39 kDa		0.00016	CON high, D13 high, D21 low	5	3	7	5	5	6	2	4	7	6	7	9	0	2	4	4	6	6	10	14	3	6	8	7	4	10	8	6	10	11	1	3	7	10	4	6	1	1	1	4	1
	TRUE	Empty	Leukemia inhibitory factor receptor OS=Rattus norvegicus GN=Lifr PE=2 SV=1	LIFR_RAT	122 kDa		< 0.00010	CON high, D13 low, D21 low	13	12	8	4	9	8	6	7	9	10	8	5	14	12	8	7	9	7	2	3	2	2	4	2	2	3	1	5	1	3	1	2	2	5	2	4	6	4	1	3	2
	TRUE	Empty	Selenium-binding protein 1 OS=Rattus norvegicus GN=Selenbp1 PE=1 SV=1	SBP1_RAT	53 kDa		0.06	[]	0	0	2	4	2	2	17	16	0	2	2	1	2	2	5	2	4	3	4	5	2	4	8	9	9	9	2	3	0	7	6	10	10	10	6	7	0	0	0	1	0
	TRUE	Empty	Pancreatic secretory granule membrane major glycoprotein GP2 OS=Rattus norvegicus GN=Gp2 PE=1 SV=1	GP2_RAT	59 kDa		0.23	[]	8	8	4	5	1	1	2	3	5	3	3	3	2	3	4	3	1	3	12	10	8	7	2	3	12	9	3	5	7	3	3	4	6	7	5	6	20	13	7	8	2
	TRUE	Empty	Podocalyxin OS=Rattus norvegicus GN=Podxl PE=1 SV=2	PODXL_RAT	52 kDa		0.54	[]	6	6	6	4	2	2	2	1	7	6	3	4	4	5	2	5	3	3	2	3	3	5	4	4	2	2	5	6	3	3	1	4	4	3	1	4	4	7	1	4	2
	TRUE	Empty	Neural cell adhesion molecule L1 OS=Rattus norvegicus GN=L1cam PE=1 SV=3	L1CAM_RAT	141 kDa		0.0045	CON high, D13 low, D21 high	5	8	6	7	6	6	4	4	7	8	3	5	0	3	5	4	10	5	3	5	1	1	2	3	1	0	2	2	3	2	0	4	3	3	4	3	8	9	3	3	6
	TRUE	Empty	Putative phospholipase B-like 2 OS=Rattus norvegicus GN=Plbd2 PE=1 SV=2	PLBL2_RAT	65 kDa		0.27	[]	4	3	5	5	6	6	4	4	5	2	1	3	2	0	3	5	5	5	3	5	5	5	3	6	2	3	3	4	3	4	3	3	5	5	6	5	4	5	7	7	7
	TRUE	Empty	Cluster of Nucleoside diphosphate kinase B OS=Rattus norvegicus GN=Nme2 PE=1 SV=1 (NDKB_RAT)	NDKB_RAT [2]	17 kDa	TRUE	0.0099	CON high, D13 high, D21 low	4	3	3	4	5	5	12	8	2	3	2	3	8	8	5	5	5	5	8	5	3	3	5	4	5	6	3	3	3	5	6	6	6	5	4	4	1	1	0	0	1
	TRUE	Empty	Mucin-2 (Fragment) OS=Rattus norvegicus GN=Muc2 PE=1 SV=1	MUC2_RAT	166 kDa		0.11	[]	0	0	2	1	0	0	1	1	0	0	0	0	22	28	0	0	0	1	1	0	25	29	4	5	0	1	0	0	36	46	0	0	0	0	19	22	0	0	0	0	0
	TRUE	Empty	Beta-hexosaminidase subunit beta OS=Rattus norvegicus GN=Hexb PE=2 SV=1	HEXB_RAT	62 kDa		0.00058	CON high, D13 high, D21 low	2	2	10	7	8	6	5	7	7	6	3	7	0	2	5	7	3	8	8	4	3	3	7	5	1	3	3	5	6	5	5	3	5	2	3	0	1	1	0	3	4
	TRUE	Empty	Beta-defensin 1 OS=Rattus norvegicus GN=Defb1 PE=2 SV=1	DEFB1_RAT	8 kDa		0.072	[]	5	4	4	1	4	4	4	3	5	3	2	3	0	6	2	2	2	2	2	3	1	3	1	4	3	2	3	3	2	1	1	2	2	2	6	7	3	4	6	4	5
	TRUE	Empty	Stanniocalcin-1 OS=Rattus norvegicus GN=Stc1 PE=2 SV=1	STC1_RAT	28 kDa		0.0038	CON low, D13 low, D21 high	12	8	5	3	6	7	2	2	3	2	5	7	4	3	5	3	3	3	4	2	3	2	2	3	5	2	2	1	2	3	4	5	3	5	5	3	14	12	9	10	6
	TRUE	Empty	78 kDa glucose-regulated protein OS=Rattus norvegicus GN=Hspa5 PE=1 SV=1	GRP78_RAT	72 kDa	TRUE	0.016	CON high, D13 low, D21 low	9	13	4	7	5	4	4	5	6	7	3	7	4	17	7	6	6	8	3	7	2	5	2	4	6	9	5	6	2	6	0	1	5	7	2	5	0	1	0	1	0
	TRUE	Empty	Peroxiredoxin-1 OS=Rattus norvegicus GN=Prdx1 PE=1 SV=1	PRDX1_RAT	22 kDa		0.32	[]	1	3	2	4	1	2	8	8	5	6	1	5	2	6	4	4	6	5	2	9	1	4	4	4	7	12	2	4	2	5	3	7	6	5	3	5	1	1	0	3	4
	TRUE	Empty	Angiotensin-converting enzyme OS=Rattus norvegicus GN=Ace PE=1 SV=1	ACE_RAT	151 kDa		0.0016	CON high, D13 high, D21 low	1	3	7	4	8	3	4	2	1	3	5	2	0	0	4	2	4	2	0	1	3	1	4	3	2	2	6	5	0	3	1	3	6	3	1	1	0	0	0	1	0
	TRUE	Empty	Protein disulfide-isomerase OS=Rattus norvegicus GN=P4hb PE=1 SV=2	PDIA1_RAT	57 kDa		< 0.00010	CON high, D13 high, D21 low	5	8	3	4	5	2	6	5	7	11	5	4	6	8	4	8	5	6	6	6	3	8	5	7	5	3	5	5	1	1	4	4	4	6	4	4	0	0	0	0	0
	TRUE	Empty	Elongation factor 1-alpha 1 OS=Rattus norvegicus GN=Eef1a1 PE=2 SV=1	EF1A1_RAT	50 kDa		0.18	[]	14	1	4	2	3	2	6	9	4	2	3	4	0	2	5	4	6	4	3	3	3	4	6	6	10	9	6	5	3	6	8	7	6	5	5	4	4	0	1	0	6
	TRUE	Empty	Phosphoglycerate kinase 1 OS=Rattus norvegicus GN=Pgk1 PE=1 SV=2	PGK1_RAT	45 kDa		0.012	CON high, D13 high, D21 low	7	3	2	5	3	4	4	6	2	6	0	7	4	5	3	5	3	5	1	5	2	4	3	6	3	5	1	2	3	2	5	3	2	5	5	5	3	5	0	1	4
	TRUE	Empty	Cluster of Putative lysozyme C-2 OS=Rattus norvegicus GN=Lyz2 PE=5 SV=1 (LYSC2_RAT)	LYSC2_RAT [2]	17 kDa	TRUE	0.016	CON high, D13 low, D21 high	5	7	5	5	4	2	4	3	4	3	3	3	8	5	3	2	4	2	2	3	3	3	1	1	1	3	2	2	3	2	4	1	2	3	5	4	4	2	4	4	4
	TRUE	Empty	Complement factor I OS=Rattus norvegicus GN=Cfi PE=2 SV=1	CFAI_RAT	67 kDa	TRUE	< 0.00010	CON high, D13 low, D21 low	10	10	10	4	7	6	6	2	3	5	7	7	12	5	9	7	7	4	1	1	2	1	0	0	5	3	2	1	1	2	1	0	2	2	4	2	6	4	3	5	0
	TRUE	Empty	Nuclear transport factor 2 OS=Rattus norvegicus GN=Nutf2 PE=1 SV=1	NTF2_RAT	14 kDa		0.0024	CON high, D13 high, D21 low	5	6	4	6	5	6	4	2	6	6	5	3	2	2	6	4	4	4	3	4	1	3	2	4	5	3	7	4	5	2	6	3	3	5	5	4	3	2	3	3	4
	TRUE	Empty	Tripeptidyl-peptidase 1 OS=Rattus norvegicus GN=Tpp1 PE=1 SV=1	TPP1_RAT	61 kDa		0.0033	CON high, D13 low, D21 low	2	2	7	5	7	5	6	5	5	4	6	4	0	0	8	5	9	6	8	4	5	6	3	1	4	4	0	3	2	2	3	0	3	4	3	1	0	2	3	3	1
	TRUE	Empty	Kynurenine/alpha-aminoadipate aminotransferase, mitochondrial OS=Rattus norvegicus GN=Aadat PE=1 SV=1	AADAT_RAT	48 kDa	TRUE	0.092	[]	0	0	1	1	1	2	13	12	6	4	0	2	2	2	4	5	5	5	4	7	2	3	5	4	9	13	6	8	2	3	8	3	3	5	3	7	1	4	1	3	4
	TRUE	Empty	Ribonuclease UK114 OS=Rattus norvegicus GN=Hrsp12 PE=1 SV=3	UK114_RAT	14 kDa		0.062	[]	2	3	2	2	2	2	8	8	2	4	2	4	2	0	3	2	3	3	4	6	6	5	4	6	7	8	2	3	5	4	5	4	5	6	4	6	4	4	6	5	5
	TRUE	Empty	Ig gamma-1 chain C region OS=Rattus norvegicus PE=1 SV=1	IGHG1_RAT	36 kDa	TRUE	0.14	[]	12	11	3	3	12	10	2	0	7	6	3	7	0	3	10	7	4	2	6	13	3	6	15	17	5	5	15	15	9	9	5	12	9	12	7	9	7	17	0	8	12
	TRUE	Empty	Quinone oxidoreductase OS=Rattus norvegicus GN=Cryz PE=2 SV=1	QOR_RAT	35 kDa		0.042	CON low, D13 high, D21 low	1	0	1	1	4	2	11	9	6	6	2	2	2	0	4	2	4	4	2	5	2	2	6	8	7	9	7	8	2	4	6	9	7	6	3	3	0	1	0	0	2
	TRUE	Empty	Complement component C9 OS=Rattus norvegicus GN=C9 PE=2 SV=1	CO9_RAT	62 kDa		0.0055	CON high, D13 low, D21 low	5	8	6	13	2	6	4	7	2	4	7	8	4	2	7	8	4	5	0	2	2	10	2	1	3	3	1	0	3	3	1	4	4	5	3	3	0	0	3	1	1
	TRUE	Empty	Acyl-CoA-binding protein OS=Rattus norvegicus GN=Dbi PE=1 SV=3	ACBP_RAT	10 kDa		0.068	[]	4	3	3	1	4	4	6	8	4	5	1	4	0	2	1	1	4	2	3	5	1	6	2	2	5	3	4	5	1	2	4	6	6	5	6	5	4	6	1	5	4
	TRUE	Empty	Neural cell adhesion molecule 1 OS=Rattus norvegicus GN=Ncam1 PE=1 SV=1	NCAM1_RAT	95 kDa		< 0.00010	CON high, D13 low, D21 low	8	11	6	6	8	4	6	5	7	11	7	5	10	11	6	5	5	6	3	2	1	3	3	4	0	1	1	2	1	2	0	3	0	3	3	3	6	4	3	4	1
	TRUE	Empty	Cysteine-rich secretory protein 1 OS=Rattus norvegicus GN=Crisp1 PE=2 SV=1	CRIS1_RAT	28 kDa		0.54	[]	6	7	2	2	0	0	3	5	4	5	0	4	0	0	4	5	8	6	7	6	6	3	4	5	7	12	3	8	2	5	0	0	6	7	1	2	0	4	0	0	1
	TRUE	Empty	Activin receptor type-1B OS=Rattus norvegicus GN=Acvr1b PE=2 SV=1	ACV1B_RAT	57 kDa		< 0.00010	CON low, D13 low, D21 high	6	6	3	2	4	2	4	2	3	6	2	3	0	3	3	3	4	3	4	6	3	3	3	4	2	4	3	6	3	3	1	4	3	2	4	3	7	6	6	5	5
	TRUE	Empty	Peroxiredoxin-6 OS=Rattus norvegicus GN=Prdx6 PE=1 SV=3	PRDX6_RAT	25 kDa		0.027	CON low, D13 high, D21 low	0	2	2	2	3	2	6	8	2	3	1	3	4	5	3	4	4	4	1	3	5	5	6	6	7	7	5	4	2	3	5	5	8	5	3	4	1	1	1	3	2
	TRUE	Empty	D-dopachrome decarboxylase OS=Rattus norvegicus GN=Ddt PE=1 SV=3	DOPD_RAT	13 kDa		0.0036	CON high, D13 high, D21 low	2	5	3	1	5	5	6	6	2	4	5	3	6	5	4	5	5	4	3	5	6	4	7	6	7	6	4	5	8	3	8	7	5	6	3	4	0	4	1	3	4
	TRUE	Empty	Tissue alpha-L-fucosidase OS=Rattus norvegicus GN=Fuca1 PE=1 SV=1	FUCO_RAT	53 kDa		0.00021	CON high, D13 high, D21 low	0	0	4	7	5	8	3	4	2	1	2	4	0	0	3	5	4	5	2	5	3	3	6	8	5	3	7	5	7	6	4	3	6	6	5	5	0	0	0	0	4
	TRUE	Empty	Cluster of Ribonuclease pancreatic gamma-type OS=Rattus norvegicus PE=3 SV=1 (RNS1G_RAT)	RNS1G_RAT [2]	17 kDa	TRUE	0.44	[]	6	4	2	2	5	5	4	4	4	6	5	3	2	2	2	2	1	1	7	6	6	4	3	3	3	3	6	4	2	2	9	9	6	7	0	1	6	2	6	1	5
	TRUE	Empty	Golgi apparatus protein 1 OS=Rattus norvegicus GN=Glg1 PE=1 SV=1	GSLG1_RAT	134 kDa		0.001	CON high, D13 low, D21 low	13	11	6	6	9	3	2	2	7	6	3	7	2	9	1	2	1	3	1	1	2	2	1	2	0	1	2	5	0	2	0	2	0	3	3	3	0	0	0	0	0
	TRUE	Empty	CD320 antigen OS=Rattus norvegicus GN=Cd320 PE=2 SV=1	CD320_RAT	28 kDa		< 0.00010	CON high, D13 low, D21 high	6	6	6	5	7	4	5	3	7	6	5	3	8	8	4	5	6	4	3	2	2	3	4	2	2	2	2	3	3	2	3	2	3	1	2	3	3	7	3	5	4
	TRUE	Empty	Cartilage oligomeric matrix protein OS=Rattus norvegicus GN=Comp PE=1 SV=1	COMP_RAT	83 kDa		< 0.00010	CON high, D13 low, D21 low	8	7	4	5	4	5	4	8	7	7	1	6	4	12	4	4	2	5	2	3	1	1	1	2	0	2	0	3	1	0	0	2	2	2	1	3	3	6	3	3	2
	TRUE	Empty	Vitamin K-dependent protein S OS=Rattus norvegicus GN=Pros1 PE=2 SV=1	PROS_RAT	75 kDa		0.00096	CON high, D13 high, D21 low	7	3	5	5	6	6	6	3	5	2	1	6	0	0	5	5	5	5	2	4	5	5	2	4	5	3	4	3	7	6	0	2	5	5	3	3	0	1	0	0	2
	TRUE	Empty	Regucalcin OS=Rattus norvegicus GN=Rgn PE=1 SV=3	RGN_RAT	33 kDa		0.016	CON low, D13 high, D21 low	0	1	1	1	1	2	8	6	2	2	0	1	4	2	3	3	0	1	3	6	2	2	7	5	11	11	8	3	2	3	4	3	9	7	2	3	3	1	1	3	5
	TRUE	Empty	Glutathione synthetase OS=Rattus norvegicus GN=Gss PE=1 SV=1	GSHB_RAT	52 kDa		0.22	[]	0	0	2	0	3	1	10	9	2	2	3	0	6	3	5	3	3	4	3	4	5	1	4	3	8	9	3	0	6	3	10	9	4	6	8	5	0	1	3	1	1
	TRUE	Empty	Inhibin beta C chain OS=Rattus norvegicus GN=Inhbc PE=2 SV=1	INHBC_RAT	39 kDa		0.78	[]	5	6	3	4	2	2	3	3	5	6	3	3	4	3	3	4	4	3	3	5	5	2	3	4	3	1	2	5	2	4	4	3	4	4	4	4	3	6	3	4	2
	TRUE	Empty	Macrophage colony-stimulating factor 1 OS=Rattus norvegicus GN=Csf1 PE=2 SV=1	CSF1_RAT	62 kDa		0.00013	CON high, D13 low, D21 low	3	4	3	1	5	2	6	5	5	2	1	3	2	6	3	0	4	2	1	4	0	1	3	2	1	3	0	2	0	1	0	2	1	1	1	1	1	4	1	1	1
	TRUE	Empty	Calmodulin OS=Rattus norvegicus GN=Calm1 PE=1 SV=2	CALM_RAT	17 kDa		0.19	[]	6	5	2	2	4	2	3	4	5	3	2	3	12	5	5	2	3	3	3	4	3	3	2	3	3	4	3	2	3	2	4	3	3	2	2	3	4	5	4	4	2
	TRUE	Empty	Lithostathine OS=Rattus norvegicus GN=Reg1 PE=1 SV=1	LITH_RAT	19 kDa		0.26	[]	0	1	2	0	4	2	10	7	7	8	8	4	2	2	2	2	4	3	1	4	1	1	3	1	3	2	6	1	3	3	3	3	2	4	3	5	6	2	1	1	6
	TRUE	Empty	Cluster of Phosphoglycerate mutase 1 OS=Rattus norvegicus GN=Pgam1 PE=1 SV=4 (PGAM1_RAT)	PGAM1_RAT [2]	29 kDa	TRUE	0.012	CON high, D13 high, D21 low	0	0	2	4	1	2	11	7	2	4	1	4	0	2	7	5	9	5	1	6	2	2	9	3	11	9	3	5	2	2	6	7	6	5	3	2	0	0	0	0	1
	TRUE	Empty	Histidine-rich glycoprotein OS=Rattus norvegicus GN=Hrg PE=1 SV=1	HRG_RAT	59 kDa		0.026	CON high, D13 low, D21 high	17	11	6	4	3	2	2	3	2	3	3	4	4	5	4	4	4	4	1	1	3	3	1	2	0	3	0	1	1	2	1	1	3	1	1	1	0	4	4	5	2
	TRUE	Empty	Ester hydrolase C11orf54 homolog OS=Rattus norvegicus PE=1 SV=1	CK054_RAT	35 kDa		0.08	[]	0	2	2	1	1	6	9	9	2	2	0	2	0	0	2	2	2	3	3	5	1	1	4	7	5	4	3	1	3	3	5	7	6	5	2	4	0	1	0	3	1
	TRUE	Empty	Gastricsin OS=Rattus norvegicus GN=Pgc PE=1 SV=1	PEPC_RAT	43 kDa		0.00044	CON high, D13 low, D21 low	0	2	7	9	5	4	6	7	4	5	3	5	4	3	7	4	9	7	6	4	1	1	2	3	2	3	5	5	2	1	5	4	4	4	2	2	0	1	0	1	2
	TRUE	Empty	Sortilin OS=Rattus norvegicus GN=Sort1 PE=1 SV=3	SORT_RAT	91 kDa		0.018	CON high, D13 high, D21 low	0	2	3	4	2	4	2	2	3	5	0	4	4	5	3	7	4	5	0	0	1	10	5	6	1	5	5	5	3	3	1	5	6	5	4	1	0	0	0	0	2
	TRUE	Empty	Solute carrier family 15 member 2 OS=Rattus norvegicus GN=Slc15a2 PE=1 SV=1	S15A2_RAT	81 kDa		0.067	[]	0	0	0	0	0	0	5	9	0	1	0	1	0	0	1	2	2	3	1	6	0	3	4	3	8	8	6	3	0	2	8	10	1	2	2	6	1	0	0	0	6
	TRUE	Empty	PP1RA_RAT-DECOY	PP1RA_RAT-DECOY	?		0.43	[]	0	1	2	0	0	2	1	1	1	2	2	1	0	0	4	2	1	0	2	1	1	2	0	0	0	1	1	0	2	2	5	1	1	2	3	0	0	1	3	1	0
	TRUE	Empty	N-acyl-aromatic-L-amino acid amidohydrolase (carboxylate-forming) OS=Rattus norvegicus GN=Acy3 PE=1 SV=1	ACY3_RAT	35 kDa		0.11	[]	1	0	2	3	2	2	9	10	4	3	0	1	4	3	2	3	4	5	7	5	2	4	4	3	6	9	2	4	2	4	4	7	7	7	3	4	3	0	1	1	4
	TRUE	Empty	Class I histocompatibility antigen, Non-RT1.A alpha-1 chain OS=Rattus norvegicus GN=RT1-Aw2 PE=1 SV=1	HA11_RAT	37 kDa	TRUE	0.82	[]	4	4	5	6	6	8	1	1	10	10	8	7	8	9	5	5	5	4	4	6	5	6	6	3	0	1	8	7	2	5	8	6	7	5	6	9	8	7	7	5	7
	TRUE	Empty	Trefoil factor 3 OS=Rattus norvegicus GN=Tff3 PE=1 SV=1	TFF3_RAT	9 kDa		0.025	CON low, D13 low, D21 high	3	3	2	2	3	2	2	2	2	2	2	1	12	8	2	1	3	1	3	3	3	6	3	4	2	3	3	5	3	3	4	3	4	3	3	3	7	6	9	9	2
	TRUE	Empty	Fructose-bisphosphate aldolase A OS=Rattus norvegicus GN=Aldoa PE=1 SV=2	ALDOA_RAT	39 kDa	TRUE	0.0088	CON high, D13 high, D21 low	8	6	3	6	3	5	4	2	7	10	2	4	2	2	3	6	4	5	2	6	2	3	1	2	7	8	1	3	0	2	3	3	5	6	0	0	0	0	1	0	1
	TRUE	Empty	Phospholysine phosphohistidine inorganic pyrophosphate phosphatase OS=Rattus norvegicus GN=Lhpp PE=2 SV=1	LHPP_RAT	29 kDa		< 0.00010	CON high, D13 high, D21 low	3	4	4	5	4	6	4	5	8	6	6	4	2	6	7	6	7	6	2	5	1	4	5	6	3	1	3	5	2	2	1	5	2	4	4	6	1	0	1	0	4
	TRUE	Empty	Lysosomal thioesterase PPT2 OS=Rattus norvegicus GN=Ppt2 PE=2 SV=1	PPT2_RAT	34 kDa		0.33	[]	5	7	5	4	6	5	2	2	5	6	5	1	4	3	4	5	3	3	4	3	5	4	3	3	1	2	5	5	1	3	3	3	4	5	4	3	6	4	3	4	7
	TRUE	Empty	Secreted phosphoprotein 24 OS=Rattus norvegicus GN=Spp2 PE=1 SV=2	SPP24_RAT	23 kDa		0.0042	CON high, D13 low, D21 high	2	3	4	2	3	3	4	2	4	3	5	4	4	3	2	3	3	2	3	4	2	0	2	2	2	2	1	2	2	2	4	2	1	2	3	3	4	5	4	4	4
	TRUE	Empty	Ubiquitin-like modifier-activating enzyme 1 OS=Rattus norvegicus GN=Uba1 PE=1 SV=1	UBA1_RAT	118 kDa		0.22	[]	1	1	1	1	0	1	1	1	1	1	0	0	0	0	1	1	1	1	0	0	0	0	0	0	1	1	0	0	1	0	1	0	1	1	0	0	0	1	1	0	1
	TRUE	Empty	14-3-3 protein zeta/delta OS=Rattus norvegicus GN=Ywhaz PE=1 SV=1	1433Z_RAT	28 kDa	TRUE	0.0022	CON high, D13 high, D21 low	5	5	4	4	5	6	8	9	4	6	5	7	4	3	8	6	7	6	9	6	6	8	6	8	8	7	6	8	3	7	6	7	6	5	4	5	1	1	0	3	5
	TRUE	Empty	Neutrophil collagenase OS=Rattus norvegicus GN=Mmp8 PE=2 SV=1	MMP8_RAT	53 kDa		0.5	[]	0	0	2	3	5	3	5	2	0	2	2	3	2	0	0	1	2	0	2	3	1	2	1	2	1	3	4	2	1	6	5	5	0	0	3	4	4	2	3	4	2
	TRUE	Empty	Tyrosine-protein phosphatase non-receptor type substrate 1 OS=Rattus norvegicus GN=Sirpa PE=1 SV=1	SHPS1_RAT	56 kDa		0.00089	CON low, D13 low, D21 high	6	7	5	1	4	3	3	2	3	3	3	3	0	3	2	3	3	2	2	2	2	1	2	3	0	3	2	4	1	2	1	4	1	4	1	4	6	4	4	8	6
	TRUE	Empty	Serine protease inhibitor A3M (Fragment) OS=Rattus norvegicus GN=Serpina3m PE=2 SV=1	SPA3M_RAT	46 kDa	TRUE	< 0.00010	CON high, D13 low, D21 low	10	8	13	10	13	11	6	6	6	5	11	13	8	8	7	7	7	6	0	3	5	5	6	3	0	3	4	4	6	5	4	5	6	4	5	5	4	4	0	5	5
	TRUE	Empty	Isocitrate dehydrogenase [NADP] cytoplasmic OS=Rattus norvegicus GN=Idh1 PE=1 SV=1	IDHC_RAT	47 kDa	TRUE	0.061	[]	0	0	2	2	3	3	11	9	1	1	2	2	2	3	4	2	4	2	1	2	3	2	2	2	5	4	0	1	2	2	4	3	3	4	2	1	0	0	0	0	1
	TRUE	Empty	Intestinal mucin-like protein (Fragment) OS=Rattus norvegicus PE=2 SV=1	MUC2L_RAT	91 kDa		0.2	[]	0	0	1	1	0	0	1	1	0	0	0	0	28	23	0	0	0	0	1	1	14	25	5	5	0	0	0	0	23	26	0	0	0	0	12	14	0	0	0	0	0
	TRUE	Empty	Galectin-5 OS=Rattus norvegicus GN=Lgals5 PE=1 SV=2	LEG5_RAT	16 kDa	TRUE	0.3	[]	6	6	10	10	13	10	6	6	0	0	0	0	0	3	0	0	18	21	7	8	7	8	12	11	4	6	0	0	0	0	5	6	0	0	15	15	1	2	4	4	7
	TRUE	Empty	Tyrosine-protein kinase Mer OS=Rattus norvegicus GN=Mertk PE=2 SV=1	MERTK_RAT	109 kDa	TRUE	0.01	CON high, D13 low, D21 high	3	6	2	4	2	9	2	1	5	4	2	4	8	8	1	2	2	4	1	2	0	2	1	4	1	0	2	2	0	2	0	1	4	1	3	2	0	6	1	5	2
	TRUE	Empty	Aflatoxin B1 aldehyde reductase member 3 OS=Rattus norvegicus GN=Akr7a3 PE=1 SV=2	ARK73_RAT	37 kDa		0.0028	CON low, D13 high, D21 low	0	0	0	0	1	0	8	6	0	0	0	0	0	0	2	4	2	2	6	6	3	3	5	6	8	7	4	4	2	5	5	7	4	5	3	1	0	1	0	0	4
	TRUE	Empty	Carcinoembryonic antigen-related cell adhesion molecule 1 OS=Rattus norvegicus GN=Ceacam1 PE=1 SV=3	CEAM1_RAT	57 kDa		0.065	[]	2	2	2	2	2	2	1	2	2	4	2	3	2	3	3	2	3	2	3	2	2	2	3	7	2	2	3	6	2	4	4	3	4	2	2	3	3	2	3	4	2
	TRUE	Empty	Cathepsin S OS=Rattus norvegicus GN=Ctss PE=2 SV=1	CATS_RAT	37 kDa		0.0062	CON low, D13 low, D21 high	1	2	2	2	2	2	3	2	2	2	0	3	10	5	2	2	3	2	2	2	3	4	5	3	3	2	2	3	2	1	5	5	3	3	3	4	4	5	4	7	4
	TRUE	Empty	Argininosuccinate synthase OS=Rattus norvegicus GN=Ass1 PE=1 SV=1	ASSY_RAT	46 kDa		0.27	[]	0	0	2	1	2	1	15	13	2	1	1	1	0	0	3	1	3	1	2	2	2	1	4	3	7	3	1	2	0	2	4	5	2	3	0	1	0	1	0	0	0
	TRUE	Empty	Coxsackievirus and adenovirus receptor homolog OS=Rattus norvegicus GN=Cxadr PE=1 SV=2	CXAR_RAT	40 kDa		0.0036	CON high, D13 low, D21 low	5	5	4	4	3	4	4	2	6	5	5	2	4	9	2	3	4	2	2	3	1	3	4	3	0	2	2	2	0	1	0	4	2	1	2	3	4	5	1	3	4
	TRUE	Empty	Junctional adhesion molecule C OS=Rattus norvegicus GN=Jam3 PE=1 SV=1	JAM3_RAT	35 kDa		0.0011	CON high, D13 low, D21 low	5	5	4	5	5	5	3	3	7	7	3	5	8	6	3	3	4	5	1	3	1	2	3	3	2	2	3	4	1	2	1	3	3	3	4	4	4	4	0	3	2
	TRUE	Empty	Amyloid-like protein 2 OS=Rattus norvegicus GN=Aplp2 PE=1 SV=2	APLP2_RAT	87 kDa	TRUE	0.06	[]	6	3	2	3	3	2	1	1	4	2	3	2	4	3	2	3	3	2	0	2	2	1	3	1	2	3	2	3	1	2	0	2	1	1	2	3	4	2	3	3	2
	TRUE	Empty	G-protein coupled receptor family C group 5 member C OS=Rattus norvegicus GN=Gprc5c PE=1 SV=2	GPC5C_RAT	48 kDa		0.22	[]	1	0	3	4	1	5	7	6	2	5	1	2	0	0	4	2	4	3	3	5	3	2	4	3	7	8	5	4	0	2	4	5	5	5	2	3	1	5	1	4	2
	TRUE	Empty	Coagulation factor XII OS=Rattus norvegicus GN=F12 PE=2 SV=1	FA12_RAT	66 kDa		< 0.00010	CON high, D13 low, D21 high	6	7	3	3	5	5	4	3	6	6	3	4	4	5	5	2	4	4	1	1	0	1	1	2	1	1	2	1	0	0	1	1	1	0	3	3	6	4	3	7	4
	TRUE	Empty	Sialidase-1 OS=Rattus norvegicus GN=Neu1 PE=1 SV=1	NEUR1_RAT	45 kDa		0.00025	CON high, D13 low, D21 low	3	3	4	7	4	10	4	5	4	8	3	4	0	0	4	5	3	5	2	4	1	3	3	1	4	3	1	2	2	1	0	0	4	5	2	0	0	1	0	0	1
	TRUE	Empty	Ephrin-A5 OS=Rattus norvegicus GN=Efna5 PE=1 SV=2	EFNA5_RAT	26 kDa		0.0012	CON high, D13 low, D21 high	4	4	3	5	3	3	2	2	2	5	5	3	2	3	1	5	2	0	0	1	0	0	2	2	2	2	0	1	1	2	1	2	1	0	2	0	3	5	1	3	1
	TRUE	Empty	Vascular cell adhesion protein 1 OS=Rattus norvegicus GN=Vcam1 PE=2 SV=1	VCAM1_RAT	81 kDa		0.0015	CON high, D13 low, D21 high	6	3	3	4	3	3	1	1	4	5	3	2	6	5	4	4	3	5	1	1	2	3	1	1	2	3	1	1	2	3	4	4	1	2	1	2	3	5	7	1	4
	TRUE	Empty	Ectonucleotide pyrophosphatase/phosphodiesterase family member 3 OS=Rattus norvegicus GN=Enpp3 PE=1 SV=2	ENPP3_RAT	99 kDa		< 0.00010	CON low, D13 high, D21 low	1	1	5	3	2	1	5	4	1	2	0	1	4	2	0	5	1	2	2	2	6	7	5	3	7	7	3	6	6	11	3	2	3	3	3	6	0	0	0	0	0
	TRUE	Empty	Beta-hexosaminidase subunit alpha OS=Rattus norvegicus GN=Hexa PE=2 SV=1	HEXA_RAT	61 kDa		0.0075	CON high, D13 high, D21 low	0	1	5	4	7	5	4	3	2	2	2	1	0	0	3	5	3	8	6	6	5	4	10	5	5	2	5	6	5	2	0	2	2	3	4	3	0	1	0	0	2
	TRUE	Empty	BMP and activin membrane-bound inhibitor homolog OS=Rattus norvegicus GN=Bambi PE=2 SV=1	BAMBI_RAT	29 kDa		0.003	CON high, D13 low, D21 high	5	7	5	3	2	5	2	3	3	6	3	2	6	2	3	2	4	4	4	2	2	1	2	3	1	3	3	2	2	2	1	1	2	1	3	2	3	6	4	3	6
	TRUE	Empty	Lactadherin OS=Rattus norvegicus GN=Mfge8 PE=2 SV=1	MFGM_RAT	47 kDa		0.5	[]	7	4	2	1	6	3	3	2	2	3	2	2	2	0	1	4	2	0	3	4	2	2	4	4	3	3	2	2	1	0	5	4	2	4	4	4	4	5	3	1	2
	TRUE	Empty	Neurofilament heavy polypeptide OS=Rattus norvegicus GN=Nefh PE=1 SV=4	NFH_RAT	115 kDa	TRUE	0.65	[]	1	0	2	1	0	0	1	0	0	2	0	0	0	0	0	0	1	0	1	2	1	1	1	0	0	0	1	0	0	1	0	0	0	0	0	0	0	1	1	1	1
	TRUE	Empty	1,2-dihydroxy-3-keto-5-methylthiopentene dioxygenase OS=Rattus norvegicus GN=Adi1 PE=2 SV=1	MTND_RAT	21 kDa		0.0057	CON high, D13 low, D21 low	1	3	3	4	2	5	3	3	2	4	3	5	2	2	2	3	4	5	1	2	1	1	5	4	2	0	2	3	0	4	0	1	2	4	3	3	0	1	0	3	1
	TRUE	Empty	Secreted frizzled-related protein 4 OS=Rattus norvegicus GN=Sfrp4 PE=2 SV=2	SFRP4_RAT	40 kDa		0.00053	CON high, D13 low, D21 low	5	3	3	1	3	3	4	1	6	2	2	1	2	8	4	4	4	2	2	2	1	2	3	1	2	1	3	1	1	1	1	1	2	2	1	3	3	4	1	1	2
	TRUE	Empty	Rho GDP-dissociation inhibitor 1 OS=Rattus norvegicus GN=Arhgdia PE=1 SV=1	GDIR1_RAT	23 kDa		0.064	[]	3	1	2	1	2	2	5	4	2	2	1	1	4	2	3	3	3	2	2	4	2	2	4	6	4	4	3	4	2	3	5	5	4	4	3	4	1	4	0	3	2
	TRUE	Empty	Aquaporin-1 OS=Rattus norvegicus GN=Aqp1 PE=1 SV=4	AQP1_RAT	29 kDa		0.18	[]	2	2	3	2	3	2	4	5	3	2	3	2	2	2	4	2	3	2	4	5	2	2	3	3	4	4	3	3	2	2	4	5	4	3	4	3	4	4	3	3	4
	TRUE	Empty	Alpha-N-acetylgalactosaminidase OS=Rattus norvegicus GN=Naga PE=2 SV=1	NAGAB_RAT	47 kDa		0.00063	CON high, D13 high, D21 low	0	0	2	3	3	5	1	2	0	2	1	4	0	0	4	0	2	2	1	1	1	1	5	3	1	3	4	2	3	2	0	5	2	5	4	3	0	2	0	0	1
	TRUE	Empty	Cytosolic non-specific dipeptidase OS=Rattus norvegicus GN=Cndp2 PE=1 SV=1	CNDP2_RAT	53 kDa		0.07	[]	0	0	0	0	0	0	13	12	2	2	0	0	0	3	2	2	3	5	3	5	1	1	2	3	7	6	3	4	0	1	1	8	8	6	5	3	0	0	0	0	1
	TRUE	Empty	Reticulon-4 receptor-like 2 OS=Rattus norvegicus GN=Rtn4rl2 PE=1 SV=1	R4RL2_RAT	46 kDa		0.017	CON high, D13 high, D21 low	2	3	2	4	4	4	5	2	5	4	2	4	0	0	3	3	5	5	3	3	1	3	3	2	1	2	6	2	2	1	1	4	4	4	2	3	1	1	0	0	1
	TRUE	Empty	Syntenin-1 OS=Rattus norvegicus GN=Sdcbp PE=1 SV=1	SDCB1_RAT	32 kDa		0.0007	CON high, D13 high, D21 low	2	2	3	4	3	2	5	4	1	2	2	1	0	2	6	5	4	7	1	3	2	2	2	4	3	3	1	1	1	1	3	4	3	2	0	2	0	0	0	1	0
	TRUE	Empty	Choline transporter-like protein 4 OS=Rattus norvegicus GN=Slc44a4 PE=2 SV=1	CTL4_RAT	79 kDa		0.25	[]	2	2	2	3	2	4	2	4	2	3	1	0	2	2	3	2	4	5	2	2	1	1	5	3	3	3	4	3	2	2	1	4	2	3	4	4	1	4	0	1	4
	TRUE	Empty	Filamin-C OS=Rattus norvegicus GN=Flnc PE=1 SV=1	FLNC_RAT	291 kDa		0.36	[]	2	1	1	1	1	1	1	2	3	2	0	1	2	6	0	1	4	2	0	1	1	1	1	0	1	0	1	0	0	2	3	2	2	0	2	2	4	2	0	4	0
	TRUE	Empty	Lysosome-associated membrane glycoprotein 1 OS=Rattus norvegicus GN=Lamp1 PE=1 SV=1	LAMP1_RAT	44 kDa		0.12	[]	3	3	1	3	3	3	3	3	2	3	2	1	2	2	1	3	2	2	2	3	2	4	0	2	4	3	3	1	1	6	1	2	1	4	2	4	1	2	3	4	2
	TRUE	Empty	Brain acid soluble protein 1 OS=Rattus norvegicus GN=Basp1 PE=1 SV=2	BASP1_RAT	22 kDa		< 0.00010	CON low, D13 low, D21 high	1	1	1	1	1	0	3	2	1	1	1	1	6	3	2	1	2	1	2	4	2	2	2	1	3	3	1	2	2	1	3	2	2	1	1	1	7	9	6	7	4
	TRUE	Empty	Peptidyl-prolyl cis-trans isomerase B OS=Rattus norvegicus GN=Ppib PE=1 SV=3	PPIB_RAT	24 kDa		0.86	[]	2	4	1	2	0	3	1	2	3	6	0	2	0	3	4	4	1	3	1	5	2	3	1	2	5	4	0	4	1	2	0	1	4	2	1	1	1	4	0	1	1
	TRUE	Empty	Zinc-alpha-2-glycoprotein OS=Rattus norvegicus GN=Azgp1 PE=2 SV=1	ZA2G_RAT	34 kDa		< 0.00010	CON high, D13 low, D21 low	3	3	6	4	5	4	2	3	2	2	3	4	4	6	4	3	4	4	0	1	2	2	1	0	2	1	0	3	0	3	1	2	1	1	2	2	0	0	0	0	0
	TRUE	Empty	Chloride intracellular channel protein 1 OS=Rattus norvegicus GN=Clic1 PE=1 SV=1	CLIC1_RAT	27 kDa		0.24	[]	0	0	1	1	1	1	4	4	2	3	1	4	2	0	1	4	4	5	2	2	1	3	2	3	5	3	1	3	2	4	10	6	3	3	2	2	1	4	1	3	4
	TRUE	Empty	Protein FAM3C OS=Rattus norvegicus GN=Fam3c PE=2 SV=1	FAM3C_RAT	25 kDa		0.039	CON high, D13 low, D21 low	7	4	3	1	3	2	2	2	2	2	1	1	6	5	4	5	4	3	2	2	1	2	2	3	2	2	2	1	2	2	1	3	2	1	2	4	1	2	3	1	1
	TRUE	Empty	Rab GDP dissociation inhibitor beta OS=Rattus norvegicus GN=Gdi2 PE=1 SV=2	GDIB_RAT	51 kDa	TRUE	0.0033	CON low, D13 high, D21 low	0	0	2	1	0	2	11	7	1	0	1	0	0	0	2	2	4	4	6	6	5	4	6	4	10	9	5	2	2	1	6	7	6	8	3	3	0	0	0	0	4
	TRUE	Empty	Cluster of Tubulin beta-4B chain OS=Rattus norvegicus GN=Tubb4b PE=1 SV=1 (TBB4B_RAT)	TBB4B_RAT [2]	50 kDa	TRUE	0.01	CON low, D13 high, D21 low	7	0	1	1	0	1	3	4	1	2	0	0	0	0	1	2	1	3	4	5	1	1	4	6	7	14	2	8	1	3	1	1	9	11	0	1	0	0	0	1	1
	TRUE	Empty	Fumarylacetoacetase OS=Rattus norvegicus GN=Fah PE=1 SV=1	FAAA_RAT	46 kDa		0.035	CON low, D13 high, D21 low	0	0	1	1	2	1	7	9	1	2	0	1	0	0	1	3	2	3	2	1	1	2	2	5	5	9	3	1	3	3	4	6	6	7	2	3	0	0	1	0	2
	TRUE	Empty	Peroxiredoxin-5, mitochondrial OS=Rattus norvegicus GN=Prdx5 PE=1 SV=1	PRDX5_RAT	22 kDa		0.26	[]	3	5	1	2	2	2	3	4	2	2	1	2	0	0	4	4	2	3	2	3	2	0	2	2	3	2	2	0	1	0	1	1	5	5	2	1	1	0	1	1	2
	TRUE	Empty	Cluster of EH domain-containing protein 1 OS=Rattus norvegicus GN=Ehd1 PE=1 SV=1 (EHD1_RAT)	EHD1_RAT [2]	61 kDa	TRUE	0.041	CON low, D13 high, D21 low	0	0	0	1	0	2	6	8	0	0	0	0	0	0	3	2	3	3	1	4	0	3	5	2	5	7	3	3	0	3	6	4	5	6	1	2	0	1	0	1	6
	TRUE	Empty	Thy-1 membrane glycoprotein OS=Rattus norvegicus GN=Thy1 PE=1 SV=1	THY1_RAT	18 kDa		0.00026	CON low, D13 low, D21 high	2	3	1	1	5	2	3	1	3	2	0	1	2	2	3	2	1	1	3	1	1	2	2	1	2	3	3	2	0	3	1	2	0	3	1	1	4	4	6	5	2
	TRUE	Empty	Pituitary tumor-transforming gene 1 protein-interacting protein OS=Rattus norvegicus GN=Pttg1ip PE=2 SV=1	PTTG_RAT	20 kDa		0.013	CON low, D13 low, D21 high	2	2	1	3	1	2	3	1	2	2	1	2	2	2	1	2	1	2	1	0	1	0	0	0	2	3	1	1	2	1	0	1	1	1	0	1	3	4	6	7	1
	TRUE	Empty	T-cell immunoglobulin and mucin domain-containing protein 2 OS=Rattus norvegicus GN=Timd2 PE=2 SV=1	TIMD2_RAT	39 kDa		0.0018	CON low, D13 low, D21 high	5	3	3	3	4	2	1	2	1	2	1	1	2	3	3	2	2	1	2	1	1	2	3	1	1	3	2	1	2	2	0	3	0	2	4	3	4	4	3	5	5
	TRUE	Empty	Phosphotriesterase-related protein OS=Rattus norvegicus GN=Pter PE=2 SV=2	PTER_RAT	39 kDa		0.0004	CON low, D13 high, D21 low	0	0	1	1	1	2	3	5	1	1	1	1	0	0	0	2	1	2	2	4	2	2	4	6	5	7	2	4	3	7	4	6	4	4	3	1	0	0	0	1	4
	TRUE	Empty	Transforming protein RhoA OS=Rattus norvegicus GN=Rhoa PE=1 SV=1	RHOA_RAT	22 kDa		0.44	[]	2	3	2	2	2	3	4	2	2	2	2	2	0	2	3	3	3	4	3	4	1	4	3	2	5	5	3	3	2	1	1	1	6	3	2	3	1	1	1	3	2
	TRUE	Empty	Chloride intracellular channel protein 4 OS=Rattus norvegicus GN=Clic4 PE=1 SV=3	CLIC4_RAT	29 kDa		0.011	CON high, D13 high, D21 low	0	0	0	0	1	1	7	7	1	4	0	1	2	3	1	2	0	3	3	6	1	1	5	4	3	3	2	2	1	3	5	4	0	3	3	1	0	1	0	0	0
	TRUE	Empty	Fatty acid-binding protein, heart OS=Rattus norvegicus GN=Fabp3 PE=1 SV=2	FABPH_RAT	15 kDa		0.059	[]	5	5	1	2	2	2	5	4	3	1	3	1	4	3	3	4	2	1	2	0	1	0	3	1	2	1	0	2	1	1	4	2	3	2	2	1	1	2	1	1	5
	TRUE	Empty	IST1 homolog OS=Rattus norvegicus GN=Ist1 PE=2 SV=1	IST1_RAT	40 kDa		0.00071	CON high, D13 high, D21 low	1	2	5	1	3	2	2	4	3	3	2	1	2	2	3	4	2	2	2	3	2	2	1	2	1	1	3	2	2	2	5	1	3	2	5	2	1	1	0	1	4
	TRUE	Empty	Ig gamma-2C chain C region OS=Rattus norvegicus PE=2 SV=1	IGG2C_RAT	37 kDa		0.16	[]	1	1	0	1	5	3	3	3	2	2	2	1	4	5	6	5	4	2	2	4	0	0	3	1	5	3	2	4	0	0	3	3	5	3	0	1	3	0	0	0	4
	TRUE	Empty	Alpha-lactalbumin OS=Rattus norvegicus GN=Lalba PE=1 SV=1	LALBA_RAT	18 kDa		< 0.00010	CON low, D13 low, D21 high	1	1	2	1	1	1	2	1	2	1	1	1	4	5	1	1	0	0	1	2	2	2	5	3	2	2	3	2	3	2	3	2	3	2	3	1	7	6	6	1	4
	TRUE	Empty	Procollagen C-endopeptidase enhancer 1 OS=Rattus norvegicus GN=Pcolce PE=1 SV=1	PCOC1_RAT	50 kDa		0.29	[]	1	1	3	2	3	3	1	4	3	6	3	3	2	5	0	2	3	2	3	0	0	2	4	3	3	3	5	2	1	3	1	2	3	2	1	6	1	2	0	0	4
	TRUE	Empty	Retinol-binding protein 4 OS=Rattus norvegicus GN=Rbp4 PE=1 SV=1	RET4_RAT	23 kDa		0.044	CON high, D13 low, D21 low	7	5	5	4	2	1	3	2	5	2	6	3	8	3	4	4	1	1	3	0	5	2	0	1	3	1	4	1	3	2	6	2	1	1	1	1	4	2	3	3	4
	TRUE	Empty	Cell adhesion molecule 4 OS=Rattus norvegicus GN=Cadm4 PE=1 SV=1	CADM4_RAT	43 kDa		< 0.00010	CON high, D13 low, D21 low	2	8	2	1	3	6	1	3	3	6	2	5	6	3	4	4	4	3	0	2	0	2	2	1	1	3	2	0	0	1	3	1	2	2	3	2	1	1	0	0	1
	TRUE	Empty	Solute carrier family 7 member 13 OS=Rattus norvegicus GN=Slc7a13 PE=2 SV=1	S7A13_RAT	54 kDa		0.66	[]	0	0	1	1	1	2	4	8	2	2	2	1	2	2	2	2	2	2	3	3	0	2	3	3	4	3	3	3	2	2	3	3	2	1	2	2	3	4	1	1	5
	TRUE	Empty	Collectrin OS=Rattus norvegicus GN=Tmem27 PE=1 SV=2	TMM27_RAT	25 kDa		0.042	CON low, D13 high, D21 high	0	0	1	1	0	1	4	4	2	2	1	2	2	3	1	1	3	1	2	5	2	1	2	3	5	3	3	4	0	4	4	4	4	2	4	2	1	4	0	0	4
	TRUE	Empty	Inter-alpha-trypsin inhibitor heavy chain H3 OS=Rattus norvegicus GN=Itih3 PE=2 SV=1	ITIH3_RAT	99 kDa		< 0.00010	CON high, D13 low, D21 low	5	5	7	7	3	6	4	4	2	3	2	5	2	3	6	2	3	4	0	2	1	3	1	2	1	4	1	1	1	0	0	1	1	2	1	1	0	1	0	1	0
	TRUE	Empty	Insulin-like growth factor-binding protein 5 OS=Rattus norvegicus GN=Igfbp5 PE=1 SV=1	IBP5_RAT	30 kDa		0.0012	CON low, D13 low, D21 high	3	3	2	1	3	4	1	1	3	2	1	1	0	3	0	2	0	1	0	1	0	1	1	0	0	2	1	2	0	1	0	2	1	1	2	4	1	1	4	5	6
	TRUE	Empty	Cluster of Solute carrier organic anion transporter family member 1A1 OS=Rattus norvegicus GN=Slco1a1 PE=1 SV=1 (SO1A1_RAT)	SO1A1_RAT [2]	74 kDa	TRUE	0.015	CON low, D13 high, D21 low	0	0	0	0	0	0	8	3	1	2	0	0	0	0	4	2	0	1	4	4	2	2	2	2	5	7	1	5	1	4	5	3	1	3	2	8	0	0	0	0	1
	TRUE	Empty	Pyridoxal kinase OS=Rattus norvegicus GN=Pdxk PE=1 SV=1	PDXK_RAT	35 kDa		0.24	[]	1	1	0	2	2	2	7	8	2	4	1	2	0	2	1	2	2	3	1	6	1	2	3	3	5	4	1	1	1	2	3	3	2	3	1	1	0	0	0	1	0
	TRUE	Empty	Cluster of Tubulin alpha-1C chain OS=Rattus norvegicus GN=Tuba1c PE=1 SV=1 (TBA1C_RAT)	TBA1C_RAT [3]	50 kDa	TRUE	0.062	[]	9	0	4	2	3	2	4	3	2	0	1	1	0	0	2	1	3	3	3	0	1	0	2	0	11	9	4	3	0	0	1	1	4	5	0	0	0	0	0	0	0
	TRUE	Empty	Xaa-Pro dipeptidase OS=Rattus norvegicus GN=Pepd PE=2 SV=1	PEPD_RAT	55 kDa		0.13	[]	0	0	1	2	1	2	8	9	1	1	1	1	0	0	1	1	1	4	0	1	0	0	4	4	3	5	1	2	1	0	0	5	5	5	0	2	0	0	0	0	0
	TRUE	Empty	Furin OS=Rattus norvegicus GN=Furin PE=1 SV=1	FURIN_RAT	87 kDa		0.24	[]	3	3	5	3	5	1	3	2	2	2	0	1	0	2	3	1	2	2	1	2	0	2	2	3	2	2	2	2	0	3	0	1	4	4	0	3	0	1	0	0	0
	TRUE	Empty	Protein NOV homolog OS=Rattus norvegicus GN=Nov PE=1 SV=1	NOV_RAT	39 kDa		0.0086	CON high, D13 low, D21 high	4	2	2	3	4	1	6	4	2	3	2	1	8	5	0	2	2	1	0	1	1	1	3	0	1	1	0	2	0	1	0	0	0	0	2	1	3	4	3	4	0
	TRUE	Empty	Sodium/potassium-transporting ATPase subunit beta-1 OS=Rattus norvegicus GN=Atp1b1 PE=1 SV=1	AT1B1_RAT	35 kDa		0.022	CON high, D13 low, D21 high	4	3	2	3	1	3	4	1	4	3	1	1	4	2	2	4	2	2	1	1	1	1	1	2	1	1	5	2	0	1	1	3	2	0	2	2	4	4	3	3	2
	TRUE	Empty	Klotho OS=Rattus norvegicus GN=Kl PE=1 SV=1	KLOT_RAT	117 kDa		0.33	[]	0	0	2	1	0	2	0	0	1	0	0	1	0	0	0	0	1	1	0	0	1	1	3	1	0	0	1	0	0	1	0	1	1	1	2	0	0	0	0	0	1
	TRUE	Empty	Cluster of Glutathione S-transferase alpha-1 OS=Rattus norvegicus GN=Gsta1 PE=1 SV=3 (GSTA1_RAT)	GSTA1_RAT [2]	26 kDa	TRUE	0.04	CON low, D13 high, D21 low	0	2	2	3	0	2	4	7	3	2	0	2	0	2	2	3	2	2	2	2	3	5	3	5	5	5	1	4	1	4	3	3	5	5	5	7	0	1	0	4	1
	TRUE	Empty	Dihydrolipoyllysine-residue succinyltransferase component of 2-oxoglutarate dehydrogenase complex, mitochondrial OS=Rattus norvegicus GN=Dlst PE=1 SV=2	ODO2_RAT	49 kDa		0.36	[]	4	4	2	1	1	2	2	1	4	2	2	1	4	6	1	2	1	3	2	0	2	3	2	3	1	1	3	3	1	2	0	2	1	2	1	2	6	6	1	4	0
	TRUE	Empty	Metalloproteinase inhibitor 1 OS=Rattus norvegicus GN=Timp1 PE=1 SV=2	TIMP1_RAT	24 kDa		0.079	[]	2	5	2	2	0	0	1	1	3	3	1	4	0	0	4	6	5	5	6	4	3	3	0	2	3	2	2	3	2	4	1	0	3	4	1	3	0	0	0	1	1
	TRUE	Empty	ATP-binding cassette sub-family G member 2 OS=Rattus norvegicus GN=Abcg2 PE=1 SV=1	ABCG2_RAT	73 kDa		0.19	[]	0	0	0	1	0	0	5	6	0	1	0	0	0	0	0	1	1	2	2	1	1	0	0	1	5	5	2	2	0	1	3	3	0	1	1	1	0	0	0	0	0
	TRUE	Empty	Legumain OS=Rattus norvegicus GN=Lgmn PE=1 SV=1	LGMN_RAT	49 kDa		0.26	[]	1	3	1	3	1	2	1	1	1	2	1	1	0	2	1	1	2	3	1	4	1	4	3	3	1	1	1	3	2	4	0	1	2	2	2	1	1	5	3	3	1
	TRUE	Empty	Adhesion G protein-coupled receptor L1 OS=Rattus norvegicus GN=Adgrl1 PE=1 SV=1	AGRL1_RAT	167 kDa		< 0.00010	CON high, D13 low, D21 low	2	3	4	4	2	3	5	4	2	3	3	3	2	5	4	2	3	5	1	2	0	1	2	3	0	1	0	2	0	3	0	0	0	0	1	2	0	4	1	1	0
	TRUE	Empty	Ephrin-A1 OS=Rattus norvegicus GN=Efna1 PE=2 SV=2	EFNA1_RAT	24 kDa		0.15	[]	3	5	2	2	1	3	0	1	3	4	0	2	0	0	1	2	2	2	1	1	0	1	2	1	2	2	3	3	1	1	0	1	2	2	2	0	1	2	1	0	2
	TRUE	Empty	Integral membrane protein 2B OS=Rattus norvegicus GN=Itm2b PE=2 SV=1	ITM2B_RAT	30 kDa		0.53	[]	0	2	2	2	2	4	1	1	3	4	1	1	0	2	1	2	2	0	1	0	1	1	1	1	1	1	4	2	1	1	1	2	1	1	1	2	0	1	0	1	1
	TRUE	Empty	CD9 antigen OS=Rattus norvegicus GN=Cd9 PE=1 SV=2	CD9_RAT	25 kDa		0.11	[]	1	3	2	2	0	2	1	1	2	1	0	1	0	2	3	1	2	2	3	4	3	2	1	1	3	1	3	3	0	3	1	1	4	2	2	0	0	1	1	1	0
	TRUE	Empty	Dihydropteridine reductase OS=Rattus norvegicus GN=Qdpr PE=1 SV=1	DHPR_RAT	26 kDa		0.03	CON high, D13 high, D21 low	0	0	1	1	1	1	11	8	1	1	0	1	0	0	2	2	3	3	2	2	1	1	3	3	4	4	2	1	2	3	4	5	5	5	3	3	0	0	0	0	1
	TRUE	Empty	Cluster of Glutathione S-transferase alpha-3 OS=Rattus norvegicus GN=Gsta3 PE=1 SV=3 (GSTA3_RAT)	GSTA3_RAT [2]	25 kDa	TRUE	0.097	[]	0	2	1	2	0	1	5	6	2	2	0	2	0	0	2	2	3	3	1	2	1	2	4	3	4	4	0	2	3	3	5	6	2	3	1	3	0	1	0	1	0
	TRUE	Empty	Acid sphingomyelinase-like phosphodiesterase 3a OS=Rattus norvegicus GN=Smpdl3a PE=2 SV=1	ASM3A_RAT	50 kDa		< 0.00010	CON high, D13 low, D21 low	2	3	2	6	5	4	4	2	2	1	2	4	2	2	4	2	6	2	2	3	1	1	2	1	2	3	2	1	2	3	1	1	5	1	1	2	0	0	1	0	1
	TRUE	Empty	Out at first protein homolog OS=Rattus norvegicus GN=Oaf PE=2 SV=1	OAF_RAT	32 kDa		< 0.00010	CON high, D13 low, D21 low	5	5	2	3	3	6	2	2	4	5	3	2	2	2	3	2	3	2	0	3	0	0	2	1	0	1	3	2	2	0	1	1	3	3	1	1	1	1	0	0	0
	TRUE	Empty	Prostaglandin F2 receptor negative regulator OS=Rattus norvegicus GN=Ptgfrn PE=1 SV=1	FPRP_RAT	99 kDa		< 0.00010	CON high, D13 low, D21 low	3	3	2	1	5	2	2	2	4	3	3	4	0	0	4	3	4	4	2	1	0	1	1	1	0	1	0	0	1	0	1	2	1	1	0	1	0	1	0	1	1
	TRUE	Empty	Ketimine reductase mu-crystallin OS=Rattus norvegicus GN=Crym PE=1 SV=1	CRYM_RAT	34 kDa		0.18	[]	0	0	1	1	2	2	8	7	1	1	0	3	0	0	1	2	1	2	0	2	1	2	1	3	2	5	1	1	0	2	4	4	2	2	1	1	0	0	0	1	0
	TRUE	Empty	Sodium-dependent neutral amino acid transporter B(0)AT3 OS=Rattus norvegicus GN=Slc6a18 PE=2 SV=1	S6A18_RAT	70 kDa		0.051	[]	0	0	0	0	0	0	6	4	2	2	0	1	0	0	0	2	1	2	0	2	0	4	2	4	4	3	2	5	0	2	5	5	1	1	3	3	0	2	0	1	4
	TRUE	Empty	Profilin-1 OS=Rattus norvegicus GN=Pfn1 PE=1 SV=2	PROF1_RAT	15 kDa		0.00079	CON high, D13 high, D21 low	1	2	2	3	2	2	3	4	3	2	1	2	0	0	3	2	3	2	2	2	2	2	3	2	5	2	2	1	2	2	4	4	5	4	2	3	0	1	0	0	2
	TRUE	Empty	TGF-beta receptor type-2 OS=Rattus norvegicus GN=Tgfbr2 PE=1 SV=1	TGFR2_RAT	64 kDa		0.0028	CON high, D13 low, D21 low	4	3	5	2	5	2	1	1	2	2	3	3	0	2	3	2	4	5	3	2	1	2	1	2	2	1	2	1	1	0	1	1	1	1	1	2	0	2	1	3	1
	TRUE	Empty	Ketohexokinase OS=Rattus norvegicus GN=Khk PE=1 SV=1	KHK_RAT	33 kDa		0.13	[]	0	0	0	0	0	1	8	5	1	2	0	0	0	0	2	0	3	2	1	2	0	1	5	2	5	3	3	0	1	1	4	2	4	3	2	2	0	0	0	0	0
	TRUE	Empty	Ciliary neurotrophic factor receptor subunit alpha OS=Rattus norvegicus GN=Cntfr PE=2 SV=2	CNTFR_RAT	41 kDa		0.0064	CON high, D13 low, D21 low	7	3	2	2	6	4	2	2	3	4	3	2	2	2	1	2	1	2	1	2	1	2	3	2	2	2	3	1	0	1	0	2	0	1	1	3	0	2	0	4	0
	TRUE	Empty	Phospholipase D3 OS=Rattus norvegicus GN=Pld3 PE=2 SV=1	PLD3_RAT	54 kDa		0.0088	CON high, D13 high, D21 low	1	1	2	2	4	2	3	2	1	2	1	2	0	0	3	2	2	2	1	2	1	2	1	2	2	2	3	2	0	1	0	2	2	2	3	1	1	0	0	0	2
	TRUE	Empty	Procollagen-lysine,2-oxoglutarate 5-dioxygenase 3 OS=Rattus norvegicus GN=Plod3 PE=2 SV=1	PLOD3_RAT	85 kDa		0.097	[]	0	1	2	2	5	4	0	3	0	0	0	1	0	0	4	2	3	2	1	2	1	3	2	0	1	1	2	2	1	1	4	5	3	4	0	2	0	0	0	0	1
	TRUE	Empty	Tyrosine-protein kinase receptor TYRO3 OS=Rattus norvegicus GN=Tyro3 PE=1 SV=1	TYRO3_RAT	96 kDa	TRUE	< 0.00010	CON high, D13 low, D21 low	2	3	2	1	1	2	2	2	3	2	0	1	4	3	3	2	3	2	1	1	0	1	1	1	1	1	1	1	1	1	1	1	1	1	1	0	1	1	1	0	2
	TRUE	Empty	Cytochrome c, somatic OS=Rattus norvegicus GN=Cycs PE=1 SV=2	CYC_RAT	12 kDa	TRUE	0.0043	CON high, D13 low, D21 low	3	4	4	3	1	2	3	2	3	2	3	4	4	6	2	3	2	2	2	1	1	0	1	0	1	2	0	0	2	4	0	1	2	0	2	5	1	0	3	4	1
	TRUE	Empty	Receptor-type tyrosine-protein phosphatase N2 OS=Rattus norvegicus GN=Ptprn2 PE=1 SV=1	PTPR2_RAT	112 kDa		< 0.00010	CON low, D13 low, D21 high	0	1	0	0	1	0	1	1	2	2	0	1	0	3	0	0	0	0	0	2	0	3	1	3	1	1	1	2	2	4	0	3	0	0	1	1	6	5	1	5	4
	TRUE	Empty	Solute carrier family 23 member 1 OS=Rattus norvegicus GN=Slc23a1 PE=2 SV=1	S23A1_RAT	65 kDa		0.18	[]	0	0	0	0	1	0	6	6	1	1	0	1	0	0	1	2	3	2	2	2	1	2	1	1	4	3	0	2	1	1	6	4	0	0	2	3	0	1	1	0	4
	TRUE	Empty	Acid ceramidase OS=Rattus norvegicus GN=Asah1 PE=2 SV=1	ASAH1_RAT	44 kDa		< 0.00010	CON high, D13 low, D21 low	2	4	4	2	6	5	1	2	3	1	1	1	0	3	4	2	2	2	2	2	1	1	2	3	0	1	2	0	0	1	0	0	0	2	0	1	0	0	0	0	0
	TRUE	Empty	Carboxylesterase 5A OS=Rattus norvegicus GN=Ces5a PE=1 SV=1	EST5A_RAT	64 kDa		0.33	[]	1	1	1	0	0	0	2	1	2	1	0	1	0	0	0	2	6	6	3	2	1	2	0	1	8	9	2	2	0	0	0	0	2	2	0	0	0	0	0	0	1
	TRUE	Empty	Cluster of Sulfotransferase 1C2A OS=Rattus norvegicus GN=Sult1c2a PE=2 SV=2 (S1C2A_RAT)	S1C2A_RAT [3]	35 kDa	TRUE	0.22	[]	1	0	2	1	0	0	7	5	1	1	0	0	2	0	1	0	2	2	2	0	0	0	2	1	4	4	1	1	0	1	5	7	1	1	1	1	0	0	0	0	0
	TRUE	Empty	Ig gamma-2B chain C region OS=Rattus norvegicus GN=Igh-1a PE=1 SV=1	IGG2B_RAT	36 kDa		0.028	CON low, D13 low, D21 high	2	2	1	0	1	1	0	1	0	0	1	1	0	0	1	1	1	1	1	2	1	2	0	1	4	4	0	2	2	6	1	2	1	1	0	0	0	2	0	1	0
	TRUE	Empty	Fibrinogen gamma chain OS=Rattus norvegicus GN=Fgg PE=1 SV=3	FIBG_RAT	51 kDa		0.48	[]	7	4	0	3	2	2	0	0	1	2	0	1	0	3	0	2	0	1	1	1	1	1	2	2	5	6	1	0	0	5	0	3	2	3	0	1	0	4	0	0	4
	TRUE	Empty	Glutathione S-transferase omega-1 OS=Rattus norvegicus GN=Gsto1 PE=1 SV=2	GSTO1_RAT	28 kDa		0.12	[]	0	0	0	1	1	1	6	4	2	2	0	1	0	2	1	2	4	2	2	2	3	2	3	1	3	2	2	2	3	0	3	2	4	2	2	3	1	0	1	1	2
	TRUE	Empty	Platelet-derived growth factor receptor alpha OS=Rattus norvegicus GN=Pdgfra PE=1 SV=2	PGFRA_RAT	123 kDa		0.0029	CON high, D13 low, D21 low	4	3	2	2	3	2	1	1	3	2	2	1	0	2	2	2	2	2	1	1	1	0	1	2	1	0	1	1	1	1	0	1	1	1	1	2	1	2	1	1	0
	TRUE	Empty	Cluster of Guanine nucleotide-binding protein G(I)/G(S)/G(T) subunit beta-2 OS=Rattus norvegicus GN=Gnb2 PE=1 SV=4 (GBB2_RAT)	GBB2_RAT [2]	37 kDa	TRUE	0.029	CON high, D13 high, D21 low	1	0	0	1	0	2	6	6	1	1	2	2	0	0	2	2	5	3	3	4	1	2	1	0	3	6	1	4	1	0	0	2	5	7	1	0	0	0	0	0	0
	TRUE	Empty	Glucose-6-phosphate isomerase OS=Rattus norvegicus GN=Gpi PE=1 SV=1	G6PI_RAT	63 kDa		0.0073	CON low, D13 high, D21 low	0	0	1	1	1	1	5	4	2	2	1	1	0	0	1	2	1	2	2	2	2	2	2	3	4	3	2	3	1	1	3	6	1	3	1	2	0	0	0	0	1
	TRUE	Empty	Keratin, type II cytoskeletal 2 epidermal OS=Rattus norvegicus GN=Krt2 PE=3 SV=1	K22E_RAT	69 kDa	TRUE	0.029	CON low, D13 low, D21 high	4	3	5	4	1	1	1	0	2	3	0	0	2	5	1	1	2	1	3	4	3	3	2	1	1	2	3	1	1	3	1	2	1	1	2	2	4	4	4	4	6
	TRUE	Empty	Basigin OS=Rattus norvegicus GN=Bsg PE=1 SV=2	BASI_RAT	42 kDa		0.00094	CON high, D13 low, D21 low	3	5	4	4	3	2	0	3	2	2	1	3	8	11	1	5	3	2	1	2	2	1	1	1	0	1	0	0	0	2	0	0	1	1	0	1	0	2	0	3	2
	TRUE	Empty	Ectonucleotide pyrophosphatase/phosphodiesterase family member 5 OS=Rattus norvegicus GN=Enpp5 PE=1 SV=2	ENPP5_RAT	54 kDa		0.13	[]	4	2	0	2	2	1	3	2	2	2	1	1	2	3	2	2	0	1	3	1	0	0	0	0	2	1	0	0	0	2	0	0	1	1	2	2	1	1	1	1	0
	TRUE	Empty	Prostasin OS=Rattus norvegicus GN=Prss8 PE=2 SV=3	PRSS8_RAT	37 kDa		0.0038	CON high, D13 low, D21 low	2	2	3	1	4	4	4	2	2	2	0	1	0	2	7	2	4	2	2	1	0	1	0	2	2	3	1	1	1	1	4	0	2	2	2	3	1	1	0	0	2
	TRUE	Empty	Insulin-like growth factor-binding protein 3 OS=Rattus norvegicus GN=Igfbp3 PE=1 SV=2	IBP3_RAT	32 kDa		0.00039	CON high, D13 low, D21 high	2	3	2	1	2	2	1	2	2	2	1	1	6	5	3	3	2	3	1	0	1	0	0	1	0	2	1	1	0	1	0	1	0	1	1	2	4	2	3	3	2
	TRUE	Empty	Aspartate aminotransferase, cytoplasmic OS=Rattus norvegicus GN=Got1 PE=1 SV=3	AATC_RAT	46 kDa		0.012	CON high, D13 high, D21 low	0	0	1	2	1	2	5	4	0	1	2	1	0	0	1	2	2	2	1	1	2	3	2	2	4	3	3	3	1	2	3	4	4	3	0	1	0	0	0	0	1
	TRUE	Empty	Cell surface glycoprotein MUC18 OS=Rattus norvegicus GN=Mcam PE=1 SV=2	MUC18_RAT	71 kDa		< 0.00010	CON high, D13 low, D21 low	4	6	4	3	3	5	1	1	5	6	0	4	6	5	3	3	4	3	1	0	0	0	2	0	0	0	2	0	0	1	1	2	2	1	0	0	0	0	0	0	1
	TRUE	Empty	Transketolase OS=Rattus norvegicus GN=Tkt PE=1 SV=1	TKT_RAT	68 kDa		< 0.00010	CON low, D13 high, D21 low	2	0	1	1	0	1	3	6	1	0	0	1	0	0	1	0	0	1	3	2	1	2	3	4	5	3	2	3	2	1	4	6	6	3	2	1	0	0	0	0	0
	TRUE	Empty	Hyaluronidase-1 OS=Rattus norvegicus GN=Hyal1 PE=2 SV=1	HYAL1_RAT	51 kDa		0.74	[]	1	0	2	1	2	2	1	1	1	2	2	3	0	0	0	1	0	2	2	2	0	0	2	1	1	1	1	2	1	1	0	3	1	2	1	2	0	1	0	1	0
	TRUE	Empty	Glutamine synthetase OS=Rattus norvegicus GN=Glul PE=1 SV=3	GLNA_RAT	42 kDa		0.062	[]	0	0	0	0	0	0	4	4	1	2	0	0	0	0	0	2	1	1	0	2	0	1	1	3	3	5	0	1	1	0	3	2	2	5	1	1	0	0	0	0	2
	TRUE	Empty	Kin of IRRE-like protein 1 OS=Rattus norvegicus GN=Kirrel PE=1 SV=2	KIRR1_RAT	87 kDa		< 0.00010	CON high, D13 low, D21 low	5	4	3	1	3	3	2	1	3	4	1	1	0	0	4	2	3	2	2	0	0	2	1	3	0	0	0	2	0	0	0	0	0	1	2	1	0	1	0	0	0
	TRUE	Empty	Protein S100-A8 OS=Rattus norvegicus GN=S100a8 PE=1 SV=3	S10A8_RAT	10 kDa		0.3	[]	1	2	2	3	1	1	0	0	1	1	2	2	0	0	6	4	3	2	6	5	1	1	1	1	0	0	1	1	3	1	0	1	3	5	2	2	3	0	1	0	0
	TRUE	Empty	Cluster of Histone H2B type 1 OS=Rattus norvegicus PE=1 SV=2 (H2B1_RAT)	H2B1_RAT [2]	14 kDa	TRUE	0.0018	CON high, D13 low, D21 low	6	3	3	2	4	2	1	1	2	2	2	1	2	2	0	0	3	1	1	0	2	0	1	2	0	0	1	1	0	0	0	0	1	1	0	2	0	0	1	0	2
	TRUE	Empty	L-lactate dehydrogenase C chain OS=Rattus norvegicus GN=Ldhc PE=1 SV=3	LDHC_RAT	36 kDa	TRUE	0.0034	CON low, D13 high, D21 low	1	0	0	0	0	0	0	0	0	0	0	0	0	0	0	0	0	1	6	5	0	0	3	4	14	13	6	6	3	3	0	0	6	6	0	0	0	0	0	0	1
	TRUE	Empty	N-acetylgalactosamine-6-sulfatase OS=Rattus norvegicus GN=Galns PE=1 SV=1	GALNS_RAT	58 kDa		< 0.00010	CON high, D13 low, D21 low	2	2	2	3	3	5	1	2	0	3	0	1	0	2	7	3	4	3	0	1	0	0	3	1	0	1	0	1	0	0	1	1	1	2	0	0	0	0	0	1	0
	TRUE	Empty	Neuronal membrane glycoprotein M6-a OS=Rattus norvegicus GN=Gpm6a PE=1 SV=1	GPM6A_RAT	31 kDa		0.0016	CON low, D13 high, D21 low	0	0	1	0	1	2	3	2	0	1	1	0	0	0	3	1	2	1	2	2	2	2	4	3	3	3	3	1	0	2	3	3	2	2	3	3	0	1	0	0	1
	TRUE	Empty	Lumican OS=Rattus norvegicus GN=Lum PE=1 SV=1	LUM_RAT	38 kDa		0.02	CON high, D13 low, D21 high	3	3	1	2	1	2	2	1	1	2	0	1	2	3	1	1	1	2	0	2	0	1	1	1	1	2	1	1	0	1	0	1	0	0	1	2	0	2	3	4	1
	TRUE	Empty	Metalloproteinase inhibitor 2 OS=Rattus norvegicus GN=Timp2 PE=1 SV=3	TIMP2_RAT	24 kDa		< 0.00010	CON high, D13 high, D21 low	2	3	3	1	2	2	1	1	3	2	1	1	0	2	3	1	3	0	1	0	2	3	1	1	1	1	1	2	0	0	0	2	2	0	1	2	0	0	0	0	0
	TRUE	Empty	V-type proton ATPase subunit B, brain isoform OS=Rattus norvegicus GN=Atp6v1b2 PE=1 SV=1	VATB2_RAT	57 kDa		0.078	[]	0	0	1	1	0	0	4	4	0	0	0	0	0	0	0	0	2	2	1	2	0	1	4	5	3	3	1	3	0	1	5	7	2	2	0	1	0	0	0	0	1
	TRUE	Empty	Glandular kallikrein-12, submandibular/renal OS=Rattus norvegicus GN=Klk12 PE=2 SV=1	KLK12_RAT	29 kDa	TRUE	0.57	[]	9	8	4	5	0	4	5	4	7	6	9	8	10	8	10	11	6	5	8	6	7	6	5	6	5	5	8	8	7	9	8	7	8	7	7	8	8	11	7	9	7
	TRUE	Empty	Insulin-like growth factor-binding protein complex acid labile subunit OS=Rattus norvegicus GN=Igfals PE=1 SV=1	ALS_RAT	67 kDa		0.32	[]	3	1	2	4	4	3	1	1	0	0	1	1	0	0	4	2	2	2	1	2	1	2	1	3	1	0	0	4	0	0	4	0	0	0	1	2	1	0	3	3	1
	TRUE	Empty	Collagen triple helix repeat-containing protein 1 OS=Rattus norvegicus GN=Cthrc1 PE=1 SV=1	CTHR1_RAT	26 kDa		< 0.00010	CON high, D13 low, D21 low	3	3	1	2	3	5	1	3	3	3	2	3	2	2	0	5	3	2	1	0	1	1	1	0	1	2	0	1	0	2	1	3	1	2	0	0	1	0	0	0	0
	TRUE	Empty	Glypican-3 OS=Rattus norvegicus GN=Gpc3 PE=1 SV=1	GPC3_RAT	67 kDa		0.002	CON high, D13 low, D21 low	1	2	3	3	3	2	1	2	7	6	1	1	0	5	1	2	6	5	1	1	1	0	1	2	0	0	1	1	1	0	0	0	1	0	1	1	0	0	1	0	1
	TRUE	Empty	Translationally-controlled tumor protein OS=Rattus norvegicus GN=Tpt1 PE=1 SV=1	TCTP_RAT	19 kDa		0.19	[]	0	1	1	1	3	1	2	3	1	1	0	2	0	2	1	2	1	1	1	2	1	1	1	3	2	1	2	1	1	1	3	2	1	2	1	2	0	0	0	0	1
	TRUE	Empty	Tumor necrosis factor receptor superfamily member 1B OS=Rattus norvegicus GN=Tnfrsf1b PE=2 SV=1	TNR1B_RAT	50 kDa		0.00024	CON low, D13 low, D21 high	1	2	0	0	3	1	1	2	2	1	0	0	0	2	0	2	3	1	2	1	0	0	2	0	0	1	1	1	0	0	0	0	1	1	2	2	3	2	3	1	1
	TRUE	Empty	CD276 antigen OS=Rattus norvegicus GN=Cd276 PE=2 SV=1	CD276_RAT	34 kDa		0.00069	CON high, D13 low, D21 low	6	3	1	1	3	3	2	0	2	2	1	1	2	5	3	2	4	3	0	0	1	1	3	0	0	0	1	2	0	1	1	0	2	1	0	1	3	1	0	0	1
	TRUE	Empty	Glutathione S-transferase P OS=Rattus norvegicus GN=Gstp1 PE=1 SV=2	GSTP1_RAT	23 kDa		0.17	[]	0	1	2	0	1	0	2	4	0	0	0	1	0	2	3	5	2	2	1	3	1	1	1	1	0	4	1	2	1	1	4	2	4	4	3	2	0	0	1	3	0
	TRUE	Empty	Integrin beta-1 OS=Rattus norvegicus GN=Itgb1 PE=2 SV=1	ITB1_RAT	88 kDa		0.0073	CON high, D13 low, D21 low	3	2	2	2	2	2	1	2	5	3	2	4	2	2	0	3	1	2	2	1	0	0	0	0	0	0	3	1	0	0	0	0	1	3	0	1	4	2	1	1	1
	TRUE	Empty	Serine protease inhibitor Kazal-type 1-like OS=Rattus norvegicus GN=Spink1l PE=1 SV=2	ISK1L_RAT	9 kDa		0.45	[]	0	0	2	1	0	0	4	2	0	0	3	5	0	0	2	3	5	6	0	0	0	0	2	3	0	0	1	0	5	2	0	0	5	4	1	0	0	0	0	0	1
	TRUE	Empty	Protein S100-A9 OS=Rattus norvegicus GN=S100a9 PE=1 SV=3	S10A9_RAT	13 kDa		0.19	[]	1	0	1	0	0	0	0	0	0	0	1	1	0	0	1	2	1	0	2	1	0	0	0	0	0	0	0	0	2	0	0	0	4	4	1	0	1	0	0	0	0
	TRUE	Empty	Apolipoprotein C-I OS=Rattus norvegicus GN=Apoc1 PE=3 SV=1	APOC1_RAT	10 kDa		0.87	[]	2	2	1	1	1	3	1	0	3	2	1	2	0	0	0	0	4	2	1	2	1	0	2	2	2	1	1	0	0	1	1	2	1	1	3	2	1	0	3	1	2
	TRUE	Empty	Frizzled-2 OS=Rattus norvegicus GN=Fzd2 PE=1 SV=1	FZD2_RAT	64 kDa		0.0081	CON high, D13 low, D21 high	4	2	1	1	3	1	2	1	2	2	1	1	2	2	1	2	3	2	1	1	1	1	1	1	3	1	1	1	1	2	0	1	1	1	2	1	3	1	3	1	1
	TRUE	Empty	Aflatoxin B1 aldehyde reductase member 2 OS=Rattus norvegicus GN=Akr7a2 PE=1 SV=2	ARK72_RAT	41 kDa		0.19	[]	0	0	1	1	1	1	6	10	0	0	0	1	0	0	0	2	0	3	0	1	2	0	2	2	2	3	2	1	0	1	3	5	2	1	2	0	0	0	0	0	0
	TRUE	Empty	Lambda-crystallin homolog OS=Rattus norvegicus GN=Cryl1 PE=1 SV=3	CRYL1_RAT	35 kDa		0.11	[]	0	0	0	0	0	2	4	4	0	0	0	1	0	0	0	1	1	3	1	1	0	0	4	2	4	5	1	1	1	1	4	3	1	3	0	0	0	0	0	0	1
	TRUE	Empty	Hemoglobin subunit alpha-1/2 OS=Rattus norvegicus GN=Hba1 PE=1 SV=3	HBA_RAT	15 kDa		0.25	[]	0	1	9	11	0	0	0	0	0	0	1	1	6	16	0	0	0	0	0	2	0	2	0	0	0	0	0	0	0	0	0	0	0	0	0	0	0	0	0	1	0
	TRUE	Empty	Phospholipase B1, membrane-associated OS=Rattus norvegicus GN=Plb1 PE=1 SV=1	PLB1_RAT	161 kDa		0.49	[]	0	0	0	1	0	0	0	0	0	0	0	0	14	20	0	0	0	0	0	0	7	3	0	1	0	0	0	0	8	6	0	0	0	0	4	5	0	0	0	0	0
	TRUE	Empty	Leukocyte surface antigen CD47 OS=Rattus norvegicus GN=Cd47 PE=1 SV=1	CD47_RAT	33 kDa		0.078	[]	1	3	2	2	3	1	1	1	1	1	1	1	2	2	3	2	2	2	1	2	0	1	2	1	1	2	1	1	1	1	1	1	1	1	1	1	1	1	1	1	1
	TRUE	Empty	7,8-dihydro-8-oxoguanine triphosphatase OS=Rattus norvegicus GN=Nudt1 PE=1 SV=1	8ODP_RAT	18 kDa		0.0056	CON high, D13 high, D21 low	0	2	2	2	2	3	1	1	1	2	1	1	0	0	2	2	3	4	0	2	0	1	0	3	0	1	2	2	1	3	0	3	2	2	3	2	0	0	0	0	1
	TRUE	Empty	Charged multivesicular body protein 5 OS=Rattus norvegicus GN=Chmp5 PE=2 SV=1	CHMP5_RAT	25 kDa		0.13	[]	7	5	2	0	1	0	1	0	2	1	0	0	0	2	0	0	1	0	0	0	0	0	0	0	0	0	0	0	0	0	0	0	1	0	0	0	0	0	0	1	0
	TRUE	Empty	Glutathione S-transferase Mu 2 OS=Rattus norvegicus GN=Gstm2 PE=1 SV=2	GSTM2_RAT	26 kDa	TRUE	0.045	CON high, D13 low, D21 low	0	0	2	4	1	1	1	2	0	0	1	2	0	2	5	5	4	5	0	3	0	1	0	1	1	1	4	1	0	2	0	0	1	4	1	1	0	0	0	0	1
	TRUE	Empty	Triokinase/FMN cyclase OS=Rattus norvegicus GN=Tkfc PE=1 SV=1	TKFC_RAT	59 kDa		0.31	[]	0	0	0	0	0	0	8	8	0	0	0	0	0	0	0	0	0	0	0	2	0	0	2	2	7	3	1	2	0	1	1	4	0	2	0	0	0	0	0	0	0
	TRUE	Empty	N(G),N(G)-dimethylarginine dimethylaminohydrolase 1 OS=Rattus norvegicus GN=Ddah1 PE=1 SV=3	DDAH1_RAT	31 kDa		0.069	[]	1	0	1	1	1	0	4	3	2	3	0	0	2	0	1	1	2	2	1	1	1	1	2	0	2	2	0	0	0	0	1	5	3	2	1	0	0	0	0	0	0
	TRUE	Empty	Deoxyribonuclease-2-beta OS=Rattus norvegicus GN=Dnase2b PE=1 SV=1	DNS2B_RAT	40 kDa		0.24	[]	0	0	0	0	0	0	4	4	0	0	2	4	0	0	0	0	5	6	0	1	0	0	0	0	0	1	0	0	1	4	0	0	4	4	0	0	0	0	0	0	0
	TRUE	Empty	Sodium-dependent phosphate transport protein 2A OS=Rattus norvegicus GN=Slc34a1 PE=1 SV=1	NPT2A_RAT	69 kDa		0.0022	CON high, D13 low, D21 low	0	0	1	4	0	2	3	5	0	2	1	1	0	0	1	2	1	1	0	0	0	0	0	0	0	1	0	0	0	0	1	1	0	0	0	0	0	0	0	0	0
	TRUE	Empty	Ephrin-B1 OS=Rattus norvegicus GN=Efnb1 PE=1 SV=1	EFNB1_RAT	38 kDa		0.00098	CON low, D13 low, D21 high	1	3	1	0	0	2	0	1	2	2	0	1	0	3	0	0	0	0	0	2	0	2	1	3	0	0	0	1	0	0	1	0	0	0	1	2	1	2	1	3	1
	TRUE	Empty	Histidine triad nucleotide-binding protein 1 OS=Rattus norvegicus GN=Hint1 PE=1 SV=5	HINT1_RAT	14 kDa		0.14	[]	2	1	0	0	0	0	1	1	2	2	0	0	2	2	2	0	1	1	0	2	1	1	2	1	1	3	1	1	2	1	1	2	2	2	1	1	3	1	1	3	1
	TRUE	Empty	Cluster of Hemoglobin subunit beta-1 OS=Rattus norvegicus GN=Hbb PE=1 SV=3 (HBB1_RAT)	HBB1_RAT [2]	16 kDa	TRUE	0.15	[]	1	1	15	13	0	0	0	0	0	0	0	2	14	12	0	0	0	0	1	0	1	1	0	0	0	0	0	0	0	0	0	0	1	0	0	0	0	0	0	0	0
	TRUE	Empty	Collagen alpha-1(I) chain OS=Rattus norvegicus GN=Col1a1 PE=1 SV=5	CO1A1_RAT	138 kDa		0.022	CON high, D13 low, D21 high	2	2	1	2	1	1	1	1	0	1	5	4	6	5	1	0	2	2	0	0	0	0	0	0	0	0	0	0	0	0	1	0	0	0	0	0	0	1	3	1	2
	TRUE	Empty	L-lactate dehydrogenase A chain OS=Rattus norvegicus GN=Ldha PE=1 SV=1	LDHA_RAT	36 kDa	TRUE	0.29	[]	2	0	1	1	2	2	10	6	0	1	1	1	0	2	2	2	4	5	3	2	2	4	2	0	3	3	0	1	1	0	3	2	2	2	3	1	0	0	1	1	1
	TRUE	Empty	CD82 antigen OS=Rattus norvegicus GN=Cd82 PE=1 SV=1	CD82_RAT	29 kDa		0.0021	CON low, D13 high, D21 low	0	0	1	1	2	1	1	1	1	2	1	1	0	0	1	1	1	1	1	1	2	2	1	2	2	3	3	2	1	3	0	2	2	2	2	3	0	1	0	3	1
	TRUE	Empty	14-3-3 protein epsilon OS=Rattus norvegicus GN=Ywhae PE=1 SV=1	1433E_RAT	29 kDa	TRUE	0.028	CON high, D13 high, D21 low	2	2	2	1	1	2	6	6	2	2	1	3	0	0	4	6	3	5	2	3	0	3	4	4	7	3	3	2	0	2	3	4	4	5	2	3	0	0	0	0	1
	TRUE	Empty	3-hydroxyanthranilate 3,4-dioxygenase OS=Rattus norvegicus GN=Haao PE=1 SV=2	3HAO_RAT	33 kDa		0.01	CON low, D13 high, D21 low	0	0	0	0	0	0	1	4	0	1	0	0	0	0	0	0	1	1	1	2	1	1	1	1	5	3	1	2	0	1	4	4	3	3	1	2	1	0	1	1	2
	TRUE	Empty	CD302 antigen OS=Rattus norvegicus GN=Cd302 PE=2 SV=1	CD302_RAT	25 kDa		0.56	[]	1	2	2	1	2	2	2	2	1	2	1	1	0	0	2	1	3	2	1	2	0	2	2	2	1	2	1	1	1	2	0	1	0	1	2	2	1	1	0	0	1
	TRUE	Empty	Receptor-type tyrosine-protein phosphatase F OS=Rattus norvegicus GN=Ptprf PE=2 SV=1	PTPRF_RAT	211 kDa		0.34	[]	0	0	1	1	0	2	0	1	0	2	0	1	0	2	0	1	1	1	0	2	0	0	0	0	0	0	3	2	0	1	0	0	1	0	0	0	0	0	0	0	0
	TRUE	Empty	TGF-beta receptor type-1 OS=Rattus norvegicus GN=Tgfbr1 PE=1 SV=1	TGFR1_RAT	56 kDa		0.0016	CON high, D13 low, D21 low	7	2	2	3	2	3	1	2	3	2	0	2	2	5	1	1	1	1	1	0	0	0	1	0	1	1	0	2	0	1	0	0	0	0	2	1	1	2	1	1	1
	TRUE	Empty	Synaptic vesicle membrane protein VAT-1 homolog OS=Rattus norvegicus GN=Vat1 PE=1 SV=1	VAT1_RAT	43 kDa		0.00029	CON low, D13 high, D21 low	0	0	1	0	0	0	2	2	1	0	0	0	0	0	1	0	3	1	1	3	1	1	2	3	3	3	2	3	1	2	1	3	3	2	1	3	0	0	0	1	2
	TRUE	Empty	Major prion protein OS=Rattus norvegicus GN=Prnp PE=1 SV=2	PRIO_RAT	28 kDa		0.015	CON high, D13 low, D21 high	2	2	2	1	4	2	1	1	2	0	2	1	2	2	1	2	1	2	1	1	1	1	1	1	1	1	1	2	1	0	1	1	1	1	1	2	1	4	3	3	4
	TRUE	Empty	Coactosin-like protein OS=Rattus norvegicus GN=Cotl1 PE=1 SV=1	COTL1_RAT	16 kDa		0.85	[]	1	1	0	0	0	0	4	4	1	2	0	1	0	0	0	0	0	0	2	1	0	0	1	0	0	1	0	0	0	0	3	3	1	1	1	0	0	0	0	0	0
	TRUE	Empty	Kininogen-1 OS=Rattus norvegicus GN=Kng1 PE=2 SV=1	KNG1_RAT	71 kDa	TRUE	0.065	[]	4	10	2	5	1	4	0	1	2	3	5	4	4	3	3	4	0	3	2	3	1	2	1	2	4	3	1	1	1	1	0	1	1	1	2	1	3	1	1	1	1
	TRUE	Empty	Calreticulin OS=Rattus norvegicus GN=Calr PE=1 SV=1	CALR_RAT	48 kDa		0.25	[]	0	1	0	1	0	2	0	0	0	1	0	1	2	2	0	1	0	0	0	1	1	1	10	4	2	0	1	1	0	0	3	1	3	4	0	0	0	0	0	0	2
	TRUE	Empty	Omega-amidase NIT2 OS=Rattus norvegicus GN=Nit2 PE=1 SV=1	NIT2_RAT	31 kDa		0.19	[]	0	0	0	1	1	2	3	3	0	0	0	2	0	0	1	1	0	2	0	2	0	0	1	2	1	1	0	0	0	1	1	1	2	2	2	3	0	0	0	0	0
	TRUE	Empty	4F2 cell-surface antigen heavy chain OS=Rattus norvegicus GN=Slc3a2 PE=1 SV=1	4F2_RAT	58 kDa		0.0081	CON high, D13 low, D21 low	2	3	2	3	2	2	1	1	2	2	0	1	0	0	2	2	3	2	0	2	1	1	1	2	1	1	3	2	0	0	0	1	1	1	1	1	0	1	0	0	0
	TRUE	Empty	V-type proton ATPase subunit S1 OS=Rattus norvegicus GN=Atp6ap1 PE=2 SV=1	VAS1_RAT	51 kDa		0.022	CON low, D13 high, D21 low	2	2	0	2	0	1	0	1	2	2	1	2	0	0	1	2	0	2	1	4	0	3	3	2	2	1	3	2	0	2	1	2	0	2	2	2	0	0	0	1	0
	TRUE	Empty	Lysosome-associated membrane glycoprotein 2 OS=Rattus norvegicus GN=Lamp2 PE=1 SV=2	LAMP2_RAT	45 kDa		0.065	[]	1	2	1	1	0	1	0	1	2	1	1	1	0	0	0	2	0	2	0	0	0	0	0	1	1	1	0	1	0	0	0	1	1	0	1	1	0	1	0	1	0
	TRUE	Empty	Aldose 1-epimerase OS=Rattus norvegicus GN=Galm PE=1 SV=1	GALM_RAT	38 kDa		0.014	CON low, D13 high, D21 low	0	0	1	1	0	2	2	4	1	0	0	1	0	0	1	1	1	1	3	3	1	1	2	3	3	3	1	2	1	2	3	1	2	2	1	1	0	1	0	0	1
	TRUE	Empty	Frizzled-8 OS=Rattus norvegicus GN=Fzd8 PE=2 SV=1	FZD8_RAT	73 kDa		0.012	CON high, D13 low, D21 high	2	3	1	1	0	2	0	1	2	2	2	2	4	2	1	2	1	1	1	0	1	1	0	0	0	1	1	0	0	0	1	0	0	1	1	1	3	4	4	1	1
	TRUE	Empty	Dipeptidase 2 OS=Rattus norvegicus GN=Dpep2 PE=2 SV=1	DPEP2_RAT	53 kDa		0.019	CON high, D13 low, D21 low	0	3	3	2	3	2	1	1	0	3	0	1	2	6	0	3	0	1	0	1	0	1	1	2	3	1	1	2	0	1	0	3	0	0	1	1	0	0	0	0	0
	TRUE	Empty	OX-2 membrane glycoprotein OS=Rattus norvegicus GN=Cd200 PE=2 SV=1	OX2G_RAT	31 kDa		0.03	CON high, D13 low, D21 high	3	4	2	2	2	1	1	1	2	2	1	0	2	2	2	2	1	1	1	1	0	0	1	0	1	0	0	0	1	0	1	0	1	1	0	1	4	2	1	0	1
	TRUE	Empty	Elongation factor 2 OS=Rattus norvegicus GN=Eef2 PE=1 SV=4	EF2_RAT	95 kDa		0.032	CON high, D13 high, D21 low	7	0	0	1	0	1	4	2	0	0	0	1	0	2	2	0	3	3	0	2	2	1	0	0	2	3	2	0	0	0	1	0	0	1	0	0	0	0	0	0	0
	TRUE	Empty	Alpha-aminoadipic semialdehyde dehydrogenase OS=Rattus norvegicus GN=Aldh7a1 PE=1 SV=2	AL7A1_RAT	59 kDa		0.21	[]	0	0	0	2	0	2	11	7	0	0	0	1	0	0	0	0	3	2	0	1	0	0	1	2	2	2	0	0	0	0	0	3	0	1	0	0	0	0	0	0	0
	TRUE	Empty	Histone H4 OS=Rattus norvegicus GN=Hist1h4b PE=1 SV=2	H4_RAT	11 kDa		0.19	[]	11	1	2	1	2	1	0	0	2	2	2	1	2	0	0	0	0	2	0	0	0	0	2	1	0	0	2	1	0	1	0	0	2	1	2	2	0	1	1	1	0
	TRUE	Empty	Renin receptor OS=Rattus norvegicus GN=Atp6ap2 PE=2 SV=1	RENR_RAT	39 kDa		0.097	[]	0	1	1	1	1	2	1	1	1	0	0	1	0	0	0	2	0	2	0	2	0	1	2	1	1	1	1	2	2	0	1	2	1	2	2	2	3	1	0	0	1
	TRUE	Empty	Sodium/glucose cotransporter 1 OS=Rattus norvegicus GN=Slc5a1 PE=2 SV=1	SC5A1_RAT	73 kDa		0.89	[]	0	0	0	1	0	0	4	7	0	1	0	0	0	0	0	2	1	2	2	1	0	0	0	1	3	2	0	0	0	2	1	2	0	0	0	0	1	1	0	0	4
	TRUE	Empty	Palmitoyl-protein thioesterase 1 OS=Rattus norvegicus GN=Ppt1 PE=1 SV=1	PPT1_RAT	34 kDa		0.0012	CON high, D13 high, D21 low	2	2	2	3	2	3	1	2	1	1	0	1	0	0	2	2	1	2	2	1	1	0	0	2	1	1	0	3	2	0	1	1	2	1	1	2	0	0	0	0	1
	TRUE	Empty	Cluster of Aldose reductase OS=Rattus norvegicus GN=Akr1b1 PE=1 SV=3 (ALDR_RAT)	ALDR_RAT [2]	36 kDa	TRUE	0.051	[]	1	1	3	4	1	2	2	2	1	0	0	1	0	0	0	1	0	0	0	2	1	1	0	1	1	1	1	0	0	1	0	1	1	1	0	0	0	0	0	0	0
	TRUE	Empty	Carbonic anhydrase 1 OS=Rattus norvegicus GN=Ca1 PE=1 SV=1	CAH1_RAT	28 kDa		0.52	[]	0	0	0	0	0	0	0	0	3	3	0	0	2	5	0	0	0	0	0	0	1	0	0	0	0	1	0	1	0	1	1	5	0	0	1	0	0	0	0	1	0
	TRUE	Empty	Cystathionine gamma-lyase OS=Rattus norvegicus GN=Cth PE=1 SV=2	CGL_RAT	44 kDa		0.024	CON low, D13 high, D21 low	0	0	0	1	0	0	4	3	1	0	0	0	0	0	0	2	0	2	0	1	0	1	2	2	5	4	2	3	0	1	1	5	2	3	1	0	0	0	0	0	0
	TRUE	Empty	Alpha-actinin-4 OS=Rattus norvegicus GN=Actn4 PE=1 SV=2	ACTN4_RAT	105 kDa		0.16	[]	0	0	1	1	0	2	9	12	0	0	1	1	0	2	1	2	0	1	0	0	0	1	0	0	1	1	0	0	0	0	0	2	0	2	1	0	0	0	0	0	0
	TRUE	Empty	Peptidyl-glycine alpha-amidating monooxygenase OS=Rattus norvegicus GN=Pam PE=1 SV=1	AMD_RAT	109 kDa		0.16	[]	0	0	3	1	0	2	0	2	1	1	0	2	2	2	0	2	0	2	0	0	1	1	1	3	1	1	1	2	1	0	0	2	0	0	2	1	0	1	0	0	0
	TRUE	Empty	Leucine-rich repeat-containing protein 15 OS=Rattus norvegicus GN=Lrrc15 PE=2 SV=1	LRC15_RAT	64 kDa		0.004	CON high, D13 low, D21 low	0	0	3	2	1	2	1	2	2	3	0	0	0	0	2	3	4	5	0	3	0	0	0	0	0	0	2	2	0	0	1	1	0	0	0	0	0	0	0	0	0
	TRUE	Empty	Sorbitol dehydrogenase OS=Rattus norvegicus GN=Sord PE=1 SV=4	DHSO_RAT	38 kDa		0.076	[]	0	0	0	0	0	0	3	7	0	0	0	0	0	0	1	1	0	2	1	1	0	0	0	2	5	4	0	2	1	2	4	4	1	3	0	0	0	0	0	0	0
	TRUE	Empty	Seminal vesicle secretory protein 5 OS=Rattus norvegicus GN=Svs5 PE=2 SV=1	SVS5_RAT	14 kDa		0.18	[]	1	0	1	1	0	0	0	0	0	0	5	7	0	0	2	1	6	5	0	0	0	0	0	0	0	0	0	0	0	0	0	0	0	0	0	0	0	0	0	0	9
	TRUE	Empty	Cytoplasmic aconitate hydratase OS=Rattus norvegicus GN=Aco1 PE=1 SV=1	ACOC_RAT	98 kDa	TRUE	0.29	[]	0	0	0	0	0	0	5	6	0	0	0	0	0	0	1	0	1	2	0	1	0	1	4	3	1	2	1	1	0	0	4	2	1	1	0	0	0	0	0	0	2
	TRUE	Empty	Cofilin-1 OS=Rattus norvegicus GN=Cfl1 PE=1 SV=3	COF1_RAT	19 kDa		0.9	[]	3	0	1	1	0	0	1	2	2	2	0	0	2	2	1	0	1	0	0	2	0	0	0	1	1	3	1	2	0	1	1	2	2	2	0	0	0	1	0	0	0
	TRUE	Empty	Protein S100-A11 OS=Rattus norvegicus GN=S100a11 PE=3 SV=1	S10AB_RAT	11 kDa		0.0033	CON high, D13 low, D21 high	2	3	2	1	1	1	1	1	1	1	1	1	2	2	2	1	1	1	1	0	1	1	1	0	1	1	1	0	1	1	1	0	1	1	1	0	1	1	1	1	1
	TRUE	Empty	Malate dehydrogenase, mitochondrial OS=Rattus norvegicus GN=Mdh2 PE=1 SV=2	MDHM_RAT	36 kDa		0.0055	CON high, D13 high, D21 low	0	0	2	2	3	1	2	2	1	2	1	1	0	0	3	2	4	3	0	0	5	2	0	1	1	0	0	0	1	0	0	0	2	3	2	1	0	0	0	0	0
	TRUE	Empty	Hydroxyacylglutathione hydrolase, mitochondrial OS=Rattus norvegicus GN=Hagh PE=1 SV=2	GLO2_RAT	34 kDa		0.085	[]	1	0	1	1	0	1	3	3	1	0	0	1	2	2	1	1	1	0	1	1	1	0	2	2	2	3	1	1	1	1	1	2	2	3	1	2	1	1	0	0	1
	TRUE	Empty	Isoamyl acetate-hydrolyzing esterase 1 homolog OS=Rattus norvegicus GN=Iah1 PE=2 SV=2	IAH1_RAT	28 kDa		0.22	[]	0	0	1	1	1	1	8	6	1	0	1	1	0	0	1	1	1	1	2	0	1	0	0	1	1	2	0	0	1	0	3	3	2	2	0	0	0	0	0	0	1
	TRUE	Empty	Growth/differentiation factor 15 OS=Rattus norvegicus GN=Gdf15 PE=3 SV=1	GDF15_RAT	33 kDa		0.00051	CON high, D13 low, D21 high	0	3	1	1	2	2	1	1	2	4	2	1	0	0	1	2	1	4	0	1	0	0	0	0	1	0	0	1	0	0	0	0	0	2	0	0	1	2	1	1	1
	TRUE	Empty	Transitional endoplasmic reticulum ATPase OS=Rattus norvegicus GN=Vcp PE=1 SV=3	TERA_RAT	89 kDa		0.082	[]	2	0	0	1	0	0	4	2	0	1	0	0	0	0	1	2	1	2	2	6	0	0	0	0	4	6	1	2	0	0	0	0	3	3	0	0	0	0	0	0	0
	TRUE	Empty	Eosinophil cationic protein OS=Rattus norvegicus GN=Rnase3 PE=2 SV=1	ECP_RAT	18 kDa		0.052	[]	3	1	0	1	1	2	1	2	2	3	1	1	2	2	0	2	0	1	1	1	1	0	0	0	0	0	1	0	1	0	1	1	0	0	0	0	0	1	0	0	0
	TRUE	Empty	Cluster of Kynurenine--oxoglutarate transaminase 1, mitochondrial OS=Rattus norvegicus GN=Ccbl1 PE=1 SV=1 (KAT1_RAT)	KAT1_RAT [2]	52 kDa	TRUE	0.17	[]	0	0	1	0	0	1	6	6	1	0	0	1	0	0	0	0	1	1	2	0	0	0	0	1	2	1	1	0	2	0	3	2	0	1	1	1	0	0	0	0	0
	TRUE	Empty	N(4)-(Beta-N-acetylglucosaminyl)-L-asparaginase OS=Rattus norvegicus GN=Aga PE=1 SV=2	ASPG_RAT	37 kDa		0.047	CON low, D13 low, D21 high	0	1	1	1	1	1	0	1	1	1	0	1	0	0	0	0	0	0	0	0	0	0	0	0	0	0	0	0	0	0	0	0	0	0	0	0	0	0	0	0	0
	TRUE	Empty	Carboxymethylenebutenolidase homolog OS=Rattus norvegicus GN=Cmbl PE=2 SV=1	CMBL_RAT	28 kDa		0.00022	CON low, D13 high, D21 low	0	0	0	1	1	1	2	2	0	0	0	1	0	0	0	1	1	2	2	2	1	1	3	1	2	4	1	1	1	2	1	4	1	2	0	1	0	0	0	0	0
	TRUE	Empty	Fibrinogen alpha chain OS=Rattus norvegicus GN=Fga PE=1 SV=3	FIBA_RAT	87 kDa		0.45	[]	6	11	1	0	0	0	1	1	0	0	0	0	2	0	1	0	1	0	1	0	0	0	0	0	0	2	0	0	0	0	0	0	0	0	0	0	0	0	0	0	0
	TRUE	Empty	Chymotrypsin-C OS=Rattus norvegicus GN=Ctrc PE=1 SV=1	CTRC_RAT	29 kDa		0.89	[]	0	0	1	1	0	0	0	0	0	0	0	0	6	6	0	1	1	0	0	0	2	2	1	2	0	0	0	0	3	6	0	0	1	2	3	5	0	0	0	0	0
	TRUE	Empty	Follitropin subunit beta OS=Rattus norvegicus GN=Fshb PE=2 SV=2	FSHB_RAT	15 kDa		0.00089	CON high, D13 low, D21 high	0	3	1	1	0	1	2	1	2	0	3	1	0	2	1	1	1	0	0	0	1	0	0	0	0	0	0	0	0	0	0	0	0	0	0	0	4	2	3	3	2
	TRUE	Empty	Hydroxyacid oxidase 2 OS=Rattus norvegicus GN=Hao2 PE=1 SV=2	HAOX2_RAT	39 kDa		0.16	[]	0	0	3	1	0	2	4	6	0	0	0	1	0	0	0	1	1	2	0	2	1	0	1	0	1	2	2	0	0	1	0	2	1	2	1	1	0	0	0	0	0
	TRUE	Empty	Cathepsin Z OS=Rattus norvegicus GN=Ctsz PE=1 SV=2	CATZ_RAT	34 kDa		0.015	CON low, D13 high, D21 low	0	1	2	1	1	1	1	1	0	1	0	1	2	0	1	2	1	2	1	0	1	1	2	2	2	2	1	1	1	1	1	0	2	2	1	2	0	1	0	1	0
	TRUE	Empty	Cluster of Heat shock protein HSP 90-beta OS=Rattus norvegicus GN=Hsp90ab1 PE=1 SV=4 (HS90B_RAT)	HS90B_RAT [2]	83 kDa	TRUE	0.2	[]	3	1	1	1	0	2	6	4	0	1	0	1	0	2	0	1	0	1	0	0	0	2	0	0	2	3	1	1	0	2	0	1	0	0	0	2	0	0	0	1	0
	TRUE	Empty	Annexin A4 OS=Rattus norvegicus GN=Anxa4 PE=1 SV=3	ANXA4_RAT	36 kDa		0.33	[]	0	0	0	0	0	0	1	2	1	2	1	1	0	0	1	2	1	3	0	1	0	0	1	2	1	2	0	1	1	1	1	1	2	2	2	0	0	0	0	0	2
	TRUE	Empty	45 kDa calcium-binding protein OS=Rattus norvegicus GN=Sdf4 PE=1 SV=1	CAB45_RAT	42 kDa		0.51	[]	2	2	3	2	0	1	0	0	0	0	0	2	0	0	0	0	0	0	0	1	0	1	0	1	0	0	0	0	0	0	0	1	0	0	0	1	1	1	1	3	0
	TRUE	Empty	Adenosylhomocysteinase OS=Rattus norvegicus GN=Ahcy PE=1 SV=3	SAHH_RAT	48 kDa		0.2	[]	0	0	1	0	0	0	4	7	1	1	0	0	0	0	2	0	2	0	1	1	1	2	1	2	2	3	1	0	0	1	0	3	1	2	0	0	0	0	0	0	0
	TRUE	Empty	Deleted in malignant brain tumors 1 protein OS=Rattus norvegicus GN=Dmbt1 PE=1 SV=1	DMBT1_RAT	156 kDa		0.43	[]	0	0	1	1	2	1	0	0	0	0	0	0	6	5	0	0	0	0	0	0	3	4	2	1	1	2	0	0	0	3	0	1	1	1	3	4	0	0	0	0	0
	TRUE	Empty	Fractalkine OS=Rattus norvegicus GN=Cx3cl1 PE=2 SV=3	X3CL1_RAT	42 kDa		0.0016	CON high, D13 low, D21 low	0	2	0	1	1	2	1	2	2	2	0	2	0	2	0	1	0	0	0	0	0	0	0	0	0	0	0	0	0	1	0	0	0	0	0	0	0	0	0	0	0
	TRUE	Empty	Cell division control protein 42 homolog OS=Rattus norvegicus GN=Cdc42 PE=1 SV=2	CDC42_RAT	21 kDa	TRUE	0.038	CON high, D13 high, D21 low	0	0	0	0	0	0	4	2	1	1	0	0	2	0	1	2	2	2	4	1	1	2	2	1	5	3	1	1	0	1	0	1	4	3	0	0	0	0	1	0	1
	TRUE	Empty	Neutral ceramidase OS=Rattus norvegicus GN=Asah2 PE=1 SV=1	ASAH2_RAT	83 kDa		< 0.00010	CON high, D13 low, D21 low	2	0	2	1	1	3	2	0	2	1	2	1	0	2	1	1	4	2	0	0	0	0	1	0	0	0	0	0	1	1	0	1	0	1	3	1	0	0	0	0	0
	TRUE	Empty	T-cell immunomodulatory protein OS=Rattus norvegicus GN=Itfg1 PE=2 SV=1	TIP_RAT	67 kDa		0.036	CON high, D13 high, D21 low	1	2	3	1	0	2	1	1	2	1	0	2	0	0	1	2	1	2	0	2	0	2	1	1	1	1	2	2	0	2	0	1	1	1	1	0	0	0	0	0	0
	TRUE	Empty	Protein disulfide-isomerase A4 OS=Rattus norvegicus GN=Pdia4 PE=1 SV=2	PDIA4_RAT	73 kDa		0.00032	CON high, D13 low, D21 low	1	2	1	1	0	2	0	2	2	2	1	1	6	2	1	1	3	1	0	0	0	0	1	1	0	0	0	0	0	0	0	0	0	0	0	0	0	1	1	1	0
	TRUE	Empty	Tumor necrosis factor receptor superfamily member 16 OS=Rattus norvegicus GN=Ngfr PE=1 SV=1	TNR16_RAT	45 kDa		0.23	[]	1	2	1	1	2	1	1	1	1	1	0	1	2	2	0	1	2	2	1	1	1	0	2	2	1	1	1	1	1	1	1	1	0	1	1	1	3	2	1	3	1
	TRUE	Empty	Brain-specific angiogenesis inhibitor 1-associated protein 2 OS=Rattus norvegicus GN=Baiap2 PE=1 SV=1	BAIP2_RAT	59 kDa		0.74	[]	0	2	1	1	0	0	3	2	1	0	0	1	0	0	0	1	1	2	0	2	0	0	0	1	2	2	1	1	0	0	0	0	2	2	0	1	0	0	0	1	0
	TRUE	Empty	Nitrilase homolog 1 OS=Rattus norvegicus GN=Nit1 PE=2 SV=1	NIT1_RAT	32 kDa		0.15	[]	0	0	0	0	0	0	4	6	0	0	0	0	0	0	0	0	1	0	1	2	1	1	1	0	3	3	0	2	0	0	1	0	5	2	0	1	0	0	0	0	0
	TRUE	Empty	Annexin A5 OS=Rattus norvegicus GN=Anxa5 PE=1 SV=3	ANXA5_RAT	36 kDa		0.0015	CON low, D13 high, D21 low	1	0	1	0	1	0	1	1	1	1	1	1	0	0	0	1	1	2	1	3	2	1	1	3	0	1	3	1	1	1	1	0	1	0	1	1	0	1	0	0	0
	TRUE	Empty	Coatomer subunit beta' OS=Rattus norvegicus GN=Copb2 PE=1 SV=3	COPB2_RAT	103 kDa		0.00084	CON low, D13 high, D21 low	0	0	2	1	1	1	1	1	0	0	0	2	0	0	0	1	1	1	1	3	0	1	2	4	2	1	3	2	0	2	0	2	1	1	0	0	0	0	0	0	0
	TRUE	Empty	Transmembrane protein 132A OS=Rattus norvegicus GN=Tmem132a PE=1 SV=1	T132A_RAT	111 kDa		0.0038	CON high, D13 high, D21 low	0	1	2	1	2	0	0	1	1	0	0	1	0	0	1	2	2	2	0	1	1	0	2	1	0	0	0	0	0	0	0	0	1	1	0	1	0	0	0	0	0
	TRUE	Empty	NKG2-D type II integral membrane protein OS=Rattus norvegicus GN=Klrk1 PE=2 SV=1	NKG2D_RAT	24 kDa		0.041	CON low, D13 low, D21 high	0	1	0	1	1	1	0	1	1	2	0	0	0	0	1	1	0	0	2	2	0	0	0	2	0	0	1	0	0	0	0	1	0	0	2	1	4	1	3	1	0
	TRUE	Empty	Hepatocyte growth factor-regulated tyrosine kinase substrate OS=Rattus norvegicus GN=Hgs PE=1 SV=1	HGS_RAT	86 kDa		0.018	CON low, D13 high, D21 low	0	0	0	0	0	0	1	1	0	0	0	0	0	0	0	0	0	0	0	1	0	0	1	0	0	2	1	0	0	0	0	0	0	0	0	1	0	0	0	0	0
	TRUE	Empty	Complement C5 (Fragment) OS=Rattus norvegicus GN=C5 PE=1 SV=2	CO5_RAT	9 kDa		0.79	[]	0	0	1	1	2	2	0	1	1	1	1	1	0	0	1	1	2	1	1	1	0	1	1	1	1	0	1	1	0	1	1	1	1	0	1	1	1	1	3	1	1
	TRUE	Empty	Cluster of Ras-related protein Rab-14 OS=Rattus norvegicus GN=Rab14 PE=1 SV=3 (RAB14_RAT)	RAB14_RAT [10]	24 kDa	TRUE	0.00059	CON high, D13 low, D21 low	4	3	2	1	2	3	1	2	2	2	1	1	0	0	2	2	2	2	0	1	0	2	0	1	0	2	0	1	0	1	0	1	1	2	1	1	0	0	0	0	0
	TRUE	Empty	UMP-CMP kinase OS=Rattus norvegicus GN=Cmpk1 PE=1 SV=2	KCY_RAT	22 kDa		0.82	[]	1	0	0	0	0	0	2	4	0	0	0	0	0	5	0	0	0	0	0	1	0	0	1	0	2	3	0	0	0	1	0	2	1	1	1	2	0	2	0	0	1
	TRUE	Empty	Glycerol-3-phosphate dehydrogenase [NAD(+)], cytoplasmic OS=Rattus norvegicus GN=Gpd1 PE=1 SV=4	GPDA_RAT	37 kDa		0.36	[]	0	0	0	0	0	0	0	1	0	0	0	0	0	0	0	0	1	0	0	0	0	0	0	0	0	2	0	0	0	0	0	1	0	0	0	0	0	0	0	0	0
	TRUE	Empty	Frizzled-1 OS=Rattus norvegicus GN=Fzd1 PE=1 SV=1	FZD1_RAT	71 kDa		< 0.00010	CON high, D13 low, D21 low	2	1	1	1	3	2	1	1	2	2	2	1	4	2	2	2	3	2	1	1	1	0	0	0	0	0	1	1	1	0	1	0	1	2	2	0	1	0	0	0	1
	TRUE	Empty	Angiopoietin-related protein 4 OS=Rattus norvegicus GN=Angptl4 PE=1 SV=1	ANGL4_RAT	45 kDa		< 0.00010	CON low, D13 low, D21 high	1	1	0	0	0	1	1	1	0	1	0	1	0	2	1	0	0	0	0	1	0	0	2	0	1	0	0	0	0	0	0	0	0	0	0	0	4	1	0	1	2
	TRUE	Empty	Acidic mammalian chitinase OS=Rattus norvegicus GN=Chia PE=2 SV=1	CHIA_RAT	52 kDa		0.0096	CON high, D13 low, D21 high	2	2	2	1	0	2	1	1	1	2	0	1	0	0	0	0	0	1	0	0	0	0	0	0	0	0	0	0	0	0	0	0	0	0	0	0	0	1	1	3	0
	TRUE	Empty	Solute carrier family 22 member 12 OS=Rattus norvegicus GN=Slc22a12 PE=2 SV=1	S22AC_RAT	60 kDa		0.7	[]	0	0	0	0	0	0	5	4	0	1	0	0	0	0	0	0	0	1	0	2	0	0	0	2	1	3	1	0	0	0	0	3	0	0	0	0	0	0	0	0	2
	TRUE	Empty	Metallothionein-1 OS=Rattus norvegicus GN=Mt1 PE=1 SV=1	MT1_RAT	6 kDa		0.11	[]	3	0	1	1	2	1	2	1	1	1	0	1	2	2	1	1	2	0	0	1	1	1	1	1	0	1	1	1	0	1	0	2	1	1	0	1	0	1	1	1	1
	TRUE	Empty	Cluster of Retinal dehydrogenase 1 OS=Rattus norvegicus GN=Aldh1a1 PE=1 SV=3 (AL1A1_RAT)	AL1A1_RAT [3]	54 kDa	TRUE	0.037	CON high, D13 low, D21 low	0	0	0	0	0	2	4	4	0	0	0	0	0	0	1	2	3	2	0	0	0	0	0	0	0	0	0	1	0	0	0	0	0	0	0	0	0	0	0	0	0
	TRUE	Empty	4-trimethylaminobutyraldehyde dehydrogenase OS=Rattus norvegicus GN=Aldh9a1 PE=1 SV=1	AL9A1_RAT	54 kDa		0.36	[]	0	0	1	0	0	0	8	5	0	0	0	0	0	0	0	1	0	2	1	1	0	0	2	2	4	3	1	0	0	0	1	1	0	0	0	0	0	0	0	0	0
	TRUE	Empty	Unconventional myosin-Ic OS=Rattus norvegicus GN=Myo1c PE=1 SV=2	MYO1C_RAT	120 kDa		0.33	[]	0	0	0	0	0	1	1	2	0	1	0	0	0	0	1	1	0	2	1	0	0	2	1	1	1	1	3	2	0	0	3	2	0	1	0	0	0	1	0	1	1
	TRUE	Empty	Growth hormone receptor OS=Rattus norvegicus GN=Ghr PE=1 SV=1	GHR_RAT	71 kDa		0.00034	CON high, D13 low, D21 low	2	3	2	1	1	0	1	1	1	3	1	1	0	2	1	2	2	1	0	0	0	0	1	1	0	0	0	0	1	0	0	0	0	1	1	0	0	2	0	0	0
	TRUE	Empty	Cluster of ADP-ribosylation factor 1 OS=Rattus norvegicus GN=Arf1 PE=1 SV=2 (ARF1_RAT)	ARF1_RAT [3]	21 kDa	TRUE	0.089	[]	0	1	0	1	0	2	3	1	1	1	0	1	0	0	1	2	2	2	1	1	0	1	1	1	3	3	1	1	1	0	0	0	0	1	0	0	0	0	0	0	1
	TRUE	Empty	Atrial natriuretic peptide-converting enzyme OS=Rattus norvegicus GN=Corin PE=1 SV=2	CORIN_RAT	123 kDa		< 0.00010	CON high, D13 low, D21 low	0	4	3	2	2	2	1	2	1	2	1	1	0	0	3	4	1	2	0	0	0	0	0	0	0	0	0	0	0	0	0	0	0	1	0	0	0	0	0	0	0
	TRUE	Empty	L-xylulose reductase OS=Rattus norvegicus GN=Dcxr PE=1 SV=1	DCXR_RAT	26 kDa		0.054	[]	0	0	0	0	0	0	4	4	0	0	0	0	0	0	0	0	1	0	2	2	0	0	1	3	2	3	1	0	0	0	4	4	1	3	0	0	0	0	0	0	0
	TRUE	Empty	Ectonucleotide pyrophosphatase/phosphodiesterase family member 6 OS=Rattus norvegicus GN=Enpp6 PE=1 SV=1	ENPP6_RAT	51 kDa		0.025	CON high, D13 high, D21 low	0	0	2	2	2	4	1	2	1	1	0	1	0	0	1	0	3	2	0	0	0	0	2	2	2	2	0	1	0	1	0	1	0	0	0	1	0	0	0	0	0
	TRUE	Empty	Ectonucleoside triphosphate diphosphohydrolase 5 OS=Rattus norvegicus GN=Entpd5 PE=2 SV=1	ENTP5_RAT	47 kDa		0.13	[]	0	0	1	1	0	0	1	2	1	0	0	1	0	0	2	1	1	2	0	0	0	1	2	1	0	0	0	0	0	3	1	4	0	0	0	0	0	0	0	0	0
	TRUE	Empty	Mucosal pentraxin OS=Rattus norvegicus GN=Mptx1 PE=2 SV=1	MPTX_RAT	24 kDa		0.088	[]	2	1	2	2	0	0	1	1	5	6	0	0	8	3	0	0	0	0	0	0	2	1	4	4	0	0	0	0	0	1	0	1	0	0	2	2	0	0	0	0	0
	TRUE	Empty	Ras-related C3 botulinum toxin substrate 1 OS=Rattus norvegicus GN=Rac1 PE=1 SV=1	RAC1_RAT	21 kDa	TRUE	0.038	CON high, D13 high, D21 low	0	1	0	0	1	1	1	1	2	2	0	1	0	0	1	1	1	0	2	0	0	0	1	1	4	1	2	0	0	2	0	1	2	1	1	1	0	0	1	0	0
	TRUE	Empty	Semaphorin-5A OS=Rattus norvegicus GN=Sema5a PE=1 SV=1	SEM5A_RAT	120 kDa		0.0018	CON high, D13 high, D21 low	1	1	1	2	2	2	1	1	1	0	0	1	2	0	1	1	1	0	0	1	0	0	2	1	0	0	0	1	0	0	0	3	0	0	0	0	0	0	0	0	0
	TRUE	Empty	10 kDa heat shock protein, mitochondrial OS=Rattus norvegicus GN=Hspe1 PE=1 SV=3	CH10_RAT	11 kDa		0.3	[]	0	1	0	1	0	0	1	1	0	0	0	1	6	5	0	0	0	1	0	0	0	1	0	0	1	1	0	0	0	2	0	0	1	2	0	1	0	0	0	0	0
	TRUE	Empty	Rab GDP dissociation inhibitor alpha OS=Rattus norvegicus GN=Gdi1 PE=1 SV=1	GDIA_RAT	51 kDa	TRUE	0.075	[]	0	0	0	1	0	2	6	3	1	0	0	0	0	0	1	2	1	2	2	4	0	1	0	1	2	4	1	1	0	1	1	4	1	4	0	1	0	0	0	0	0
	TRUE	Empty	Peroxiredoxin-2 OS=Rattus norvegicus GN=Prdx2 PE=1 SV=3	PRDX2_RAT	22 kDa		0.11	[]	0	0	2	1	1	2	4	4	1	0	0	0	0	0	1	0	2	2	0	0	0	2	1	0	1	0	0	1	0	0	1	1	2	2	1	0	0	0	0	0	0
	TRUE	Empty	Plectin OS=Rattus norvegicus GN=Plec PE=1 SV=2	PLEC_RAT	534 kDa		0.38	[]	2	0	0	0	0	0	0	0	0	0	0	0	0	0	0	0	0	0	0	0	0	0	0	0	0	0	0	0	0	0	0	0	0	0	0	0	0	0	0	0	0
	TRUE	Empty	WNT1-inducible-signaling pathway protein 1 OS=Rattus norvegicus GN=Wisp1 PE=2 SV=1	WISP1_RAT	41 kDa		0.00012	CON high, D13 low, D21 high	0	2	0	1	1	1	2	2	2	2	1	2	0	3	0	1	2	1	0	0	0	0	0	0	0	0	0	0	0	0	0	0	0	0	0	0	1	1	0	1	1
	TRUE	Empty	Oncomodulin OS=Rattus norvegicus GN=Ocm PE=1 SV=2	ONCO_RAT	12 kDa		0.19	[]	1	1	0	0	0	2	0	1	1	1	0	1	0	0	0	0	0	2	0	1	0	1	1	1	2	0	1	1	1	0	0	0	0	0	2	1	0	1	3	0	0
	TRUE	Empty	Aspartoacylase OS=Rattus norvegicus GN=Aspa PE=1 SV=2	ACY2_RAT	35 kDa		0.34	[]	0	0	0	0	0	0	5	7	0	0	0	0	0	0	0	0	0	1	0	2	0	1	0	1	2	2	0	1	0	0	0	2	0	3	1	0	0	0	0	0	0
	TRUE	Empty	ATP synthase subunit alpha, mitochondrial OS=Rattus norvegicus GN=Atp5a1 PE=1 SV=2	ATPA_RAT	60 kDa		0.33	[]	6	0	0	0	0	0	1	0	0	0	0	0	0	0	0	0	0	1	0	0	0	0	0	0	0	0	1	2	0	0	0	0	0	1	0	0	0	0	0	0	0
	TRUE	Empty	4-hydroxyphenylpyruvate dioxygenase OS=Rattus norvegicus GN=Hpd PE=1 SV=3	HPPD_RAT	45 kDa		0.35	[]	0	0	0	1	1	0	6	8	0	0	0	0	0	0	0	1	1	1	0	0	0	0	0	1	2	1	0	0	0	0	1	2	1	0	0	0	0	0	0	0	0
	TRUE	Empty	Purine nucleoside phosphorylase OS=Rattus norvegicus GN=Pnp PE=1 SV=1	PNPH_RAT	32 kDa		0.16	[]	0	0	0	0	0	0	3	2	0	0	0	0	0	0	1	1	1	1	0	0	0	0	0	0	0	0	0	1	0	1	0	1	0	0	0	0	0	0	0	0	0
	TRUE	Empty	Adhesion G protein-coupled receptor F5 OS=Rattus norvegicus GN=Adgrf5 PE=1 SV=1	AGRF5_RAT	149 kDa		0.75	[]	0	0	0	1	0	1	1	1	0	0	1	0	0	2	0	0	0	1	0	1	0	0	2	0	2	1	1	0	0	0	0	1	1	1	0	0	0	0	0	0	0
	TRUE	Empty	Annexin A2 OS=Rattus norvegicus GN=Anxa2 PE=1 SV=2	ANXA2_RAT	39 kDa		0.0097	CON high, D13 high, D21 low	2	3	0	1	2	2	0	1	0	2	0	3	0	0	1	1	0	1	0	3	0	0	0	2	2	0	0	0	1	2	0	0	0	0	1	1	0	0	0	0	0
	TRUE	Empty	Fibrinogen beta chain OS=Rattus norvegicus GN=Fgb PE=1 SV=4	FIBB_RAT	54 kDa		0.53	[]	6	6	1	0	0	0	0	0	1	0	0	0	0	0	1	1	0	0	0	1	0	0	0	0	5	3	0	0	0	0	0	0	0	0	0	0	0	0	0	0	0
	TRUE	Empty	Glandular kallikrein-10 OS=Rattus norvegicus GN=Klk10 PE=1 SV=2	KLK10_RAT	29 kDa	TRUE	0.25	[]	9	0	0	0	0	3	12	10	6	0	0	6	8	0	8	8	0	0	0	0	6	0	0	0	5	4	0	0	7	0	0	0	7	5	5	0	6	0	0	0	0
	TRUE	Empty	Phosphoenolpyruvate carboxykinase, cytosolic [GTP] OS=Rattus norvegicus GN=Pck1 PE=1 SV=1	PCKGC_RAT	69 kDa		0.014	CON low, D13 high, D21 low	0	0	0	0	0	0	2	3	0	0	0	1	0	0	0	0	0	1	0	3	0	0	1	4	1	3	0	1	0	0	1	3	3	4	0	1	0	0	0	0	0
	TRUE	Empty	Multidrug and toxin extrusion protein 1 OS=Rattus norvegicus GN=Slc47a1 PE=1 SV=1	S47A1_RAT	61 kDa		0.011	CON low, D13 high, D21 low	0	0	0	0	0	0	1	2	2	0	0	0	0	0	0	1	1	1	0	2	1	0	2	0	2	3	2	1	0	2	1	1	1	0	2	2	1	0	0	0	2
	TRUE	Empty	Carboxypeptidase B2 OS=Rattus norvegicus GN=Cpb2 PE=2 SV=1	CBPB2_RAT	49 kDa		0.0028	CON high, D13 low, D21 low	0	0	2	1	2	1	1	1	0	0	0	1	0	0	0	2	1	0	0	0	0	0	1	0	0	0	0	0	0	0	0	0	0	0	0	0	0	0	0	0	0
	TRUE	Empty	Cell surface glycoprotein CD200 receptor 1 OS=Rattus norvegicus GN=Cd200r1 PE=1 SV=1	MO2R1_RAT	36 kDa		0.78	[]	2	0	2	0	0	1	1	0	1	1	1	1	0	0	2	0	0	1	1	1	0	1	0	1	0	0	0	2	1	0	0	0	1	0	0	1	0	1	0	1	0
	TRUE	Empty	Myelin protein zero-like protein 1 OS=Rattus norvegicus GN=Mpzl1 PE=2 SV=1	MPZL1_RAT	30 kDa		0.021	CON high, D13 low, D21 high	1	2	0	1	0	0	1	1	2	2	0	0	0	0	0	2	1	0	0	0	0	0	0	0	0	0	0	0	0	0	0	0	0	0	0	0	0	1	0	1	0
	TRUE	Empty	Tissue factor pathway inhibitor OS=Rattus norvegicus GN=Tfpi PE=2 SV=1	TFPI1_RAT	35 kDa		0.53	[]	1	1	0	1	2	2	0	1	0	1	0	1	2	2	1	1	1	1	0	1	0	1	0	0	1	1	1	1	1	1	0	2	0	0	1	2	1	1	1	0	1
	TRUE	Empty	Cluster of Guanine nucleotide-binding protein G(i) subunit alpha-2 OS=Rattus norvegicus GN=Gnai2 PE=1 SV=3 (GNAI2_RAT)	GNAI2_RAT [3]	41 kDa	TRUE	0.019	CON high, D13 high, D21 low	0	0	0	0	0	0	4	4	0	0	0	1	0	0	1	1	4	2	1	3	0	1	2	0	2	3	1	2	1	1	0	2	2	4	0	1	0	0	0	0	0
	TRUE	Empty	Pyruvate kinase PKM OS=Rattus norvegicus GN=Pkm PE=1 SV=3	KPYM_RAT	58 kDa	TRUE	< 0.00010	CON high, D13 low, D21 low	9	0	2	2	1	2	2	0	2	2	0	1	0	0	3	2	3	3	0	0	0	0	0	0	0	0	1	0	0	0	0	0	0	1	0	0	0	0	0	0	0
	TRUE	Empty	Alpha-mannosidase 2 OS=Rattus norvegicus GN=Man2a1 PE=1 SV=2	MA2A1_RAT	131 kDa		0.015	CON high, D13 low, D21 low	0	1	2	2	0	1	1	1	0	0	0	0	0	0	0	2	1	2	0	0	0	0	0	0	0	0	0	2	0	0	0	0	1	1	0	0	0	0	0	0	0
	TRUE	Empty	Sucrase-isomaltase, intestinal OS=Rattus norvegicus GN=Si PE=1 SV=5	SUIS_RAT	210 kDa		0.15	[]	0	0	0	0	0	1	1	1	0	0	0	0	4	3	0	2	1	1	0	1	2	1	2	0	1	0	1	0	0	2	0	0	1	3	4	2	0	0	0	0	0
	TRUE	Empty	Prostatic acid phosphatase OS=Rattus norvegicus GN=Acpp PE=1 SV=1	PPAP_RAT	44 kDa		0.09	[]	0	0	0	1	0	1	0	0	0	0	0	1	0	0	1	2	2	1	1	1	0	0	1	1	1	1	0	0	0	0	0	0	1	3	0	0	0	0	0	0	0
	TRUE	Empty	Follistatin OS=Rattus norvegicus GN=Fst PE=1 SV=1	FST_RAT	38 kDa		0.093	[]	3	1	2	1	1	1	0	1	2	3	1	0	0	2	0	0	0	0	0	1	0	0	1	0	0	0	1	1	0	0	0	0	1	0	0	0	1	0	1	0	0
	TRUE	Empty	Glutathione S-transferase theta-2 OS=Rattus norvegicus GN=Gstt2 PE=1 SV=3	GSTT2_RAT	27 kDa		0.23	[]	0	0	0	0	0	0	2	2	0	0	0	0	0	0	0	0	0	1	0	0	0	0	1	0	1	2	0	0	0	0	1	1	1	1	1	0	0	0	0	0	1
	TRUE	Empty	Na(+)/H(+) exchange regulatory cofactor NHE-RF2 OS=Rattus norvegicus GN=Slc9a3r2 PE=1 SV=1	NHRF2_RAT	37 kDa		0.091	[]	1	2	0	1	1	0	0	0	1	2	0	0	0	0	0	0	0	0	0	0	0	1	0	0	0	0	1	0	0	1	0	1	0	1	0	0	1	2	0	0	0
	TRUE	Empty	Myosin-9 OS=Rattus norvegicus GN=Myh9 PE=1 SV=3	MYH9_RAT	226 kDa	TRUE	0.1	[]	0	0	1	0	0	0	0	1	1	0	0	0	0	5	0	0	1	0	0	0	0	0	0	0	0	0	0	0	0	0	0	0	0	0	0	0	0	0	0	0	0
	TRUE	Empty	Insulin-like growth factor-binding protein 1 OS=Rattus norvegicus GN=Igfbp1 PE=1 SV=2	IBP1_RAT	30 kDa		0.045	CON high, D13 low, D21 low	3	3	1	1	2	0	0	0	2	2	1	1	0	0	1	1	0	0	0	1	0	0	0	0	0	0	0	0	0	0	0	0	1	0	0	0	0	1	1	0	0
	TRUE	Empty	Pterin-4-alpha-carbinolamine dehydratase OS=Rattus norvegicus GN=Pcbd1 PE=1 SV=2	PHS_RAT	12 kDa		0.31	[]	1	0	0	0	0	2	1	1	0	1	0	0	2	2	0	0	0	0	0	1	0	0	0	1	0	0	0	0	0	0	0	2	0	1	1	0	1	0	0	0	0
	TRUE	Empty	Adhesion G-protein coupled receptor G1 OS=Rattus norvegicus GN=Adgrg1 PE=1 SV=1	AGRG1_RAT	?		0.56	[]	1	1	1	0	1	0	0	0	1	2	1	1	0	0	1	1	1	1	0	1	0	0	1	1	2	0	1	1	1	1	1	1	1	2	0	1	1	1	0	0	1
	TRUE	Empty	WAP four-disulfide core domain protein 12 OS=Rattus norvegicus GN=Wfdc12 PE=3 SV=1	WFD12_RAT	9 kDa		0.0077	CON high, D13 low, D21 high	1	1	0	1	0	1	1	1	2	2	0	0	0	2	0	1	0	1	0	0	0	0	0	0	0	0	0	0	0	0	0	0	0	0	0	0	0	0	0	0	0
	TRUE	Empty	6-phosphogluconate dehydrogenase, decarboxylating OS=Rattus norvegicus GN=Pgd PE=1 SV=1	6PGD_RAT	53 kDa		0.068	[]	0	0	1	0	1	0	2	2	0	0	0	0	0	0	1	1	1	1	0	2	0	1	1	2	0	2	0	0	0	1	1	2	0	1	0	1	0	0	0	0	1
	TRUE	Empty	Heparin cofactor 2 OS=Rattus norvegicus GN=Serpind1 PE=1 SV=1	HEP2_RAT	55 kDa		0.00013	CON high, D13 low, D21 low	2	1	2	2	0	1	1	0	0	0	1	1	0	0	1	1	2	1	0	0	0	0	0	0	0	0	0	0	0	0	0	0	0	0	0	0	0	0	0	0	0
	TRUE	Empty	Gamma-enolase OS=Rattus norvegicus GN=Eno2 PE=1 SV=2	ENOG_RAT	47 kDa	TRUE	0.14	[]	0	0	0	0	0	0	0	0	2	0	0	0	0	0	0	0	0	0	7	3	0	0	0	0	4	0	0	0	0	2	5	0	0	0	0	0	3	0	1	0	4
	TRUE	Empty	Cluster of 14-3-3 protein gamma OS=Rattus norvegicus GN=Ywhag PE=1 SV=2 (1433G_RAT)	1433G_RAT [2]	28 kDa	TRUE	0.031	CON high, D13 high, D21 low	2	3	2	2	2	2	5	4	2	3	0	2	0	0	2	3	4	2	0	4	1	0	3	0	5	0	3	4	0	0	1	0	3	5	0	0	0	0	0	3	0
	TRUE	Empty	Melanoma-derived growth regulatory protein OS=Rattus norvegicus GN=Mia PE=2 SV=2	MIA_RAT	15 kDa		0.034	CON low, D13 high, D21 low	0	1	1	1	0	0	1	1	0	0	0	0	0	0	0	1	0	1	0	1	2	2	3	3	2	1	0	1	1	0	1	0	1	1	2	0	0	0	0	0	0
	TRUE	Empty	Soluble calcium-activated nucleotidase 1 OS=Rattus norvegicus GN=Cant1 PE=1 SV=1	CANT1_RAT	46 kDa		0.0087	CON high, D13 high, D21 low	0	1	1	1	0	2	0	0	1	1	0	1	0	0	0	1	0	0	0	0	0	0	0	1	0	0	1	0	0	1	0	0	0	1	0	0	0	0	0	0	0
	TRUE	Empty	Cluster of Sodium/potassium-transporting ATPase subunit alpha-1 OS=Rattus norvegicus GN=Atp1a1 PE=1 SV=1 (AT1A1_RAT)	AT1A1_RAT [4]	113 kDa	TRUE	0.32	[]	0	0	1	1	1	0	1	1	2	0	0	1	0	0	1	0	0	2	0	0	0	0	0	0	1	0	1	1	0	0	0	1	1	1	0	0	0	0	0	0	1
	TRUE	Empty	Annexin A6 OS=Rattus norvegicus GN=Anxa6 PE=1 SV=2	ANXA6_RAT	76 kDa		0.0013	CON high, D13 low, D21 low	1	0	2	1	1	1	4	2	1	0	0	1	0	0	2	2	4	3	0	1	0	0	0	0	0	0	1	0	0	0	0	0	0	0	0	0	0	0	0	0	0
	TRUE	Empty	Neuropilin-1 OS=Rattus norvegicus GN=Nrp1 PE=1 SV=1	NRP1_RAT	103 kDa		0.12	[]	0	1	1	1	1	2	0	0	0	1	0	0	0	0	0	0	2	1	0	1	0	0	0	0	0	0	0	0	0	0	0	1	0	1	0	0	0	0	0	0	0
	TRUE	Empty	Cluster of 14-3-3 protein beta/alpha OS=Rattus norvegicus GN=Ywhab PE=1 SV=3 (1433B_RAT)	1433B_RAT [2]	28 kDa	TRUE	0.009	CON high, D13 high, D21 low	2	3	0	2	2	2	6	4	2	3	1	2	0	2	3	3	5	3	3	4	0	4	4	3	5	4	3	5	1	4	3	5	4	5	0	0	0	0	0	3	0
	TRUE	Empty	Lactoylglutathione lyase OS=Rattus norvegicus GN=Glo1 PE=1 SV=3	LGUL_RAT	21 kDa		0.016	CON high, D13 low, D21 low	0	0	0	0	0	1	2	2	2	2	0	0	2	0	2	1	1	1	0	2	0	0	0	0	2	0	1	0	0	0	0	0	1	0	0	0	0	0	0	0	0
	TRUE	Empty	C-type mannose receptor 2 OS=Rattus norvegicus GN=Mrc2 PE=1 SV=1	MRC2_RAT	167 kDa		0.0026	CON high, D13 low, D21 low	0	0	1	3	0	2	0	2	1	3	0	3	0	0	0	2	0	1	0	0	0	0	0	0	0	0	1	0	0	1	0	0	0	0	0	1	0	0	0	0	0
	TRUE	Empty	Interleukin-11 receptor subunit alpha OS=Rattus norvegicus GN=Il11ra1 PE=2 SV=1	I11RA_RAT	47 kDa		0.011	CON high, D13 high, D21 low	1	1	1	1	2	2	1	0	0	2	0	1	0	0	0	0	2	1	1	2	0	0	0	0	0	0	1	0	1	0	0	0	0	2	1	1	0	0	0	0	0
	TRUE	Empty	Complement component C6 OS=Rattus norvegicus GN=C6 PE=2 SV=1	CO6_RAT	105 kDa		0.002	CON high, D13 low, D21 low	1	1	2	1	1	1	1	0	1	1	3	1	0	2	0	0	0	2	0	0	0	0	0	0	1	0	0	1	0	0	0	0	0	0	0	0	0	1	0	1	0
	TRUE	Empty	Aromatic-L-amino-acid decarboxylase OS=Rattus norvegicus GN=Ddc PE=1 SV=1	DDC_RAT	54 kDa		0.17	[]	0	0	0	1	0	0	2	5	0	0	0	0	0	0	0	0	1	0	0	1	0	0	2	3	2	2	0	0	0	0	1	3	0	0	0	1	0	0	0	0	0
	TRUE	Empty	Leukocyte elastase inhibitor A OS=Rattus norvegicus GN=Serpinb1a PE=1 SV=1	ILEUA_RAT	43 kDa		0.037	CON low, D13 high, D21 low	0	0	0	1	0	0	0	0	0	0	0	0	0	0	1	0	0	0	0	0	1	1	1	0	1	0	0	1	6	3	0	1	4	2	0	0	0	0	0	0	0
	TRUE	Empty	Synaptosomal-associated protein 23 OS=Rattus norvegicus GN=Snap23 PE=1 SV=1	SNP23_RAT	23 kDa		0.54	[]	0	0	0	0	0	0	1	2	1	1	0	0	0	2	0	1	1	2	0	1	1	0	0	0	1	2	0	0	0	0	0	2	1	1	0	0	0	0	0	0	0
	TRUE	Empty	Macrophage migration inhibitory factor OS=Rattus norvegicus GN=Mif PE=1 SV=4	MIF_RAT	12 kDa		0.0034	CON low, D13 high, D21 high	0	0	0	0	0	0	1	0	0	0	0	0	0	0	0	0	0	0	2	1	1	0	1	1	1	2	0	0	0	2	1	1	0	1	0	0	1	1	0	1	0
	TRUE	Empty	Fibroblast growth factor receptor 1 OS=Rattus norvegicus GN=Fgfr1 PE=1 SV=1	FGFR1_RAT	92 kDa		< 0.00010	CON high, D13 low, D21 low	1	3	0	1	1	2	2	2	1	2	1	0	2	0	0	1	0	1	0	0	0	0	0	0	0	0	0	0	0	0	0	0	0	0	0	0	0	0	0	0	0
	TRUE	Empty	Uteroglobin OS=Rattus norvegicus GN=Scgb1a1 PE=1 SV=2	UTER_RAT	10 kDa		0.061	[]	1	1	0	0	1	0	3	1	2	2	0	1	2	2	0	0	2	2	1	0	0	0	1	1	0	0	0	0	1	1	0	0	0	0	0	1	0	1	0	3	0
	TRUE	Empty	Prostaglandin reductase 2 OS=Rattus norvegicus GN=Ptgr2 PE=2 SV=2	PTGR2_RAT	38 kDa		0.0011	CON high, D13 low, D21 low	0	0	2	1	1	1	2	2	1	1	0	0	0	0	1	1	1	1	0	0	0	0	0	0	0	0	0	0	0	0	0	1	0	0	0	0	0	0	0	0	0
	TRUE	Empty	Vimentin OS=Rattus norvegicus GN=Vim PE=1 SV=2	VIME_RAT	54 kDa	TRUE	0.17	[]	5	0	0	0	1	0	0	0	0	1	0	0	0	0	0	0	0	0	0	0	0	0	0	0	0	0	0	0	0	0	0	0	0	0	0	0	0	0	0	0	0
	TRUE	Empty	Cytochrome c, testis-specific OS=Rattus norvegicus GN=Cyct PE=2 SV=2	CYC2_RAT	12 kDa	TRUE	0.27	[]	0	0	0	0	0	0	0	0	0	0	0	0	0	0	0	0	0	0	0	2	0	0	0	0	5	3	3	3	0	0	0	0	2	0	0	0	0	0	0	0	0
	TRUE	Empty	Threonine synthase-like 2 OS=Rattus norvegicus GN=Thnsl2 PE=2 SV=1	THNS2_RAT	54 kDa		0.33	[]	0	0	0	0	0	0	4	4	0	0	0	1	0	0	0	0	0	0	0	1	0	1	0	2	3	2	0	0	0	0	1	1	1	0	0	1	0	0	0	0	0
	TRUE	Empty	ATP synthase subunit beta, mitochondrial OS=Rattus norvegicus GN=Atp5b PE=1 SV=2	ATPB_RAT	56 kDa		0.012	CON high, D13 low, D21 low	1	0	1	3	0	0	2	2	0	0	0	0	2	0	0	0	1	2	0	0	1	1	0	0	0	0	0	0	0	0	0	0	0	0	0	0	0	0	0	0	0
	TRUE	Empty	Leucine-rich repeat transmembrane protein FLRT2 OS=Rattus norvegicus GN=Flrt2 PE=1 SV=1	FLRT2_RAT	74 kDa		0.00014	CON high, D13 low, D21 low	0	3	0	2	0	2	0	1	1	0	0	1	0	0	0	1	0	2	0	0	0	0	0	1	0	0	0	1	0	0	0	0	0	0	0	0	0	0	0	0	0
	TRUE	Empty	Reticulon-4 receptor-like 1 OS=Rattus norvegicus GN=Rtn4rl1 PE=2 SV=1	R4RL1_RAT	50 kDa		0.025	CON high, D13 low, D21 low	0	2	0	1	0	2	0	1	0	0	0	1	0	0	0	2	1	2	0	1	1	0	0	1	0	0	0	0	0	0	0	1	0	1	1	0	0	0	0	0	0
	TRUE	Empty	Aldehyde oxidase 4 OS=Rattus norvegicus GN=Aox4 PE=2 SV=1	AOXD_RAT	148 kDa		0.0027	CON low, D13 high, D21 low	0	1	0	1	0	0	1	2	0	0	0	0	0	0	0	0	0	0	0	0	0	2	2	1	1	1	2	2	0	0	0	1	1	1	1	0	0	0	0	0	0
	TRUE	Empty	Platelet-derived growth factor receptor beta OS=Rattus norvegicus GN=Pdgfrb PE=2 SV=2	PGFRB_RAT	123 kDa		0.0004	CON high, D13 low, D21 low	1	1	2	0	1	2	1	1	0	2	0	1	2	0	2	0	0	3	1	1	0	0	1	0	0	0	1	0	0	0	0	0	0	2	0	1	0	0	0	0	0
	TRUE	Empty	Carboxypeptidase D OS=Rattus norvegicus GN=Cpd PE=1 SV=2	CBPD_RAT	153 kDa		0.038	CON high, D13 low, D21 low	0	0	0	0	0	0	1	1	0	0	0	0	0	0	0	2	2	1	0	0	0	0	0	0	0	0	0	0	0	0	0	0	0	0	0	0	0	0	0	0	0
	TRUE	Empty	Deoxyribonuclease-2-alpha OS=Rattus norvegicus GN=Dnase2 PE=2 SV=1	DNS2A_RAT	38 kDa		0.16	[]	0	1	0	1	0	0	0	0	0	0	0	1	0	0	1	2	0	0	1	1	0	0	0	0	0	0	1	0	0	2	0	0	2	1	0	0	1	0	1	0	0
	TRUE	Empty	Cornifin-A OS=Rattus norvegicus GN=Sprr1a PE=2 SV=1	SPR1A_RAT	17 kDa		0.67	[]	1	1	1	0	0	0	0	0	0	0	1	0	0	0	0	0	1	0	2	1	0	1	0	1	0	0	0	0	0	0	0	0	0	1	0	1	0	1	0	0	0
	TRUE	Empty	Adenylate kinase isoenzyme 1 OS=Rattus norvegicus GN=Ak1 PE=1 SV=3	KAD1_RAT	22 kDa		0.075	[]	1	1	0	0	2	0	1	1	1	1	0	1	0	2	0	2	1	0	0	0	0	0	1	1	0	0	1	0	0	0	0	1	0	0	1	0	0	0	0	0	1
	TRUE	Empty	Myoglobin OS=Rattus norvegicus GN=Mb PE=1 SV=3	MYG_RAT	17 kDa		0.77	[]	0	0	0	0	0	0	1	0	2	2	0	1	0	0	0	0	0	0	0	0	0	0	1	1	0	0	4	4	0	1	0	0	0	0	0	0	0	0	0	3	0
	TRUE	Empty	Ras-related protein Rab-11B OS=Rattus norvegicus GN=Rab11b PE=1 SV=4	RB11B_RAT	24 kDa		0.15	[]	0	0	0	0	0	0	3	2	0	0	0	0	0	0	1	1	2	1	1	0	0	1	0	0	0	2	0	0	1	0	0	0	0	0	0	0	0	0	0	0	0
	TRUE	Empty	Endothelial protein C receptor OS=Rattus norvegicus GN=Procr PE=2 SV=1	EPCR_RAT	27 kDa		< 0.00010	CON high, D13 low, D21 low	2	2	1	1	2	2	1	0	0	1	2	1	2	2	2	0	2	2	0	0	0	0	0	0	0	0	1	0	0	1	0	1	0	1	0	0	0	0	0	0	0
	TRUE	Empty	Thioredoxin-dependent peroxide reductase, mitochondrial OS=Rattus norvegicus GN=Prdx3 PE=1 SV=2	PRDX3_RAT	28 kDa		0.044	CON high, D13 high, D21 low	0	0	0	1	1	1	1	1	0	0	0	0	0	0	1	1	2	2	0	3	0	0	0	1	2	1	0	1	1	1	0	1	2	1	0	0	0	0	0	0	0
	TRUE	Empty	Inositol monophosphatase 1 OS=Rattus norvegicus GN=Impa1 PE=1 SV=2	IMPA1_RAT	31 kDa		0.31	[]	0	1	1	0	0	0	2	2	1	0	0	1	0	0	0	0	0	0	0	0	0	0	0	0	0	1	0	0	0	0	0	0	1	0	0	0	0	0	0	0	0
	TRUE	Empty	Selenoprotein P OS=Rattus norvegicus GN=Sepp1 PE=1 SV=2	SEPP1_RAT	43 kDa		0.00013	CON high, D13 low, D21 low	1	2	0	1	0	0	0	1	1	3	1	1	4	2	1	2	0	1	0	0	0	0	0	0	0	0	0	0	0	0	0	0	0	0	0	0	0	0	0	0	0
	TRUE	Empty	Myosin light polypeptide 6 OS=Rattus norvegicus GN=Myl6 PE=1 SV=3	MYL6_RAT	17 kDa		0.22	[]	2	1	0	1	0	0	1	0	0	2	0	0	2	2	1	1	1	1	1	0	0	0	0	0	0	0	0	0	0	0	1	0	1	2	0	0	0	0	0	0	1
	TRUE	Empty	Serum paraoxonase/arylesterase 1 OS=Rattus norvegicus GN=Pon1 PE=1 SV=3	PON1_RAT	39 kDa		0.0012	CON high, D13 low, D21 low	3	2	2	1	2	2	0	1	0	0	0	1	0	0	1	0	0	2	0	0	0	0	0	0	0	0	0	0	0	0	0	0	0	0	0	0	0	0	0	0	0
	TRUE	Empty	3-hydroxybutyrate dehydrogenase type 2 OS=Rattus norvegicus GN=Bdh2 PE=3 SV=2	BDH2_RAT	27 kDa		0.17	[]	0	0	0	0	0	0	2	4	0	0	0	0	0	0	0	0	0	1	0	0	0	0	0	1	1	3	0	1	0	0	1	2	1	1	0	2	0	0	0	0	0
	TRUE	Empty	Hemojuvelin OS=Rattus norvegicus GN=Hfe2 PE=2 SV=1	RGMC_RAT	45 kDa		0.2	[]	0	1	0	1	1	2	0	1	1	1	0	1	0	0	0	1	1	1	0	0	0	0	1	1	0	0	0	1	0	0	0	0	0	0	1	1	0	0	0	0	1
	TRUE	Empty	Cluster of Phosphatidylcholine translocator ABCB4 OS=Rattus norvegicus GN=Abcb4 PE=1 SV=1 (MDR3_RAT)	MDR3_RAT [2]	141 kDa	TRUE	0.33	[]	0	0	0	0	0	0	1	2	0	0	0	0	0	0	0	0	0	1	0	0	0	0	0	0	1	0	0	0	0	0	0	0	0	0	0	0	0	0	0	0	0
	TRUE	Empty	3-ketoacyl-CoA thiolase, mitochondrial OS=Rattus norvegicus GN=Acaa2 PE=2 SV=1	THIM_RAT	42 kDa		0.24	[]	0	0	1	0	0	0	0	0	0	0	0	0	0	0	0	0	1	2	0	1	0	0	0	0	1	2	0	0	0	0	0	0	4	5	0	0	0	0	0	0	0
	TRUE	Empty	Epithelial discoidin domain-containing receptor 1 OS=Rattus norvegicus GN=Ddr1 PE=2 SV=1	DDR1_RAT	101 kDa		0.015	CON high, D13 low, D21 low	0	1	0	1	0	1	0	2	0	0	0	0	0	0	0	1	0	0	0	0	0	0	0	0	0	1	0	0	0	0	0	0	0	0	0	0	0	0	0	0	0
	TRUE	Empty	Regenerating islet-derived protein 3-beta OS=Rattus norvegicus GN=Reg3b PE=1 SV=1	REG3B_RAT	20 kDa		0.017	CON high, D13 low, D21 low	1	0	2	0	1	1	3	1	2	2	2	1	0	0	1	0	0	0	0	0	0	0	0	0	0	0	1	0	1	0	0	0	1	1	1	0	1	0	0	0	1
	TRUE	Empty	Collagen alpha-1(II) chain OS=Rattus norvegicus GN=Col2a1 PE=1 SV=2	CO2A1_RAT	135 kDa		0.013	CON high, D13 low, D21 low	1	1	1	1	1	2	1	0	1	2	0	0	0	2	0	0	0	1	0	0	0	0	0	0	0	0	0	0	0	0	0	0	0	0	1	1	0	0	1	0	1
	TRUE	Empty	Eukaryotic translation initiation factor 6 OS=Rattus norvegicus GN=Eif6 PE=1 SV=1	IF6_RAT	27 kDa		0.0043	CON high, D13 low, D21 low	0	0	2	2	1	2	0	1	1	0	0	1	0	0	0	1	1	2	0	1	0	0	1	0	1	0	1	0	0	1	0	0	0	1	0	1	0	0	0	0	0
	TRUE	Empty	Carbonic anhydrase 4 OS=Rattus norvegicus GN=Ca4 PE=1 SV=1	CAH4_RAT	35 kDa		0.17	[]	0	3	0	1	0	0	0	1	0	0	0	0	0	0	0	2	0	1	0	0	0	0	0	0	0	0	0	0	0	0	0	1	0	0	0	0	0	0	0	0	0
	TRUE	Empty	Peflin OS=Rattus norvegicus GN=Pef1 PE=2 SV=1	PEF1_RAT	30 kDa		0.12	[]	0	0	1	1	1	2	1	2	0	0	0	0	0	0	0	0	0	2	1	0	0	1	0	0	1	0	0	0	0	0	0	0	0	0	0	0	0	0	0	0	0
	TRUE	Empty	Serine protease hepsin OS=Rattus norvegicus GN=Hpn PE=2 SV=1	HEPS_RAT	45 kDa		0.1	[]	0	0	1	1	0	1	1	2	0	0	0	1	0	0	0	1	0	1	0	0	0	1	0	0	1	2	0	1	0	0	0	1	0	1	0	0	0	0	0	0	0
	TRUE	Empty	Tartrate-resistant acid phosphatase type 5 OS=Rattus norvegicus GN=Acp5 PE=1 SV=1	PPA5_RAT	37 kDa		0.27	[]	0	0	0	0	0	0	0	1	0	0	0	1	0	0	0	0	0	1	0	0	0	0	0	0	2	1	1	1	0	0	0	0	0	0	0	0	0	0	0	0	0
	TRUE	Empty	Galectin-9 OS=Rattus norvegicus GN=Lgals9 PE=2 SV=2	LEG9_RAT	40 kDa	TRUE	0.18	[]	3	0	0	0	7	6	2	4	1	0	1	0	0	3	1	0	6	7	0	0	0	0	0	7	2	5	1	0	0	0	0	4	1	0	7	8	0	0	0	0	4
	TRUE	Empty	Catechol O-methyltransferase OS=Rattus norvegicus GN=Comt PE=1 SV=2	COMT_RAT	30 kDa		0.26	[]	0	0	0	1	1	1	5	3	0	0	0	1	0	0	0	0	0	1	0	2	0	0	0	0	0	0	0	0	0	1	0	1	0	1	0	0	0	0	0	0	0
	TRUE	Empty	Glutathione S-transferase alpha-4 OS=Rattus norvegicus GN=Gsta4 PE=1 SV=2	GSTA4_RAT	26 kDa	TRUE	0.16	[]	0	0	0	1	0	0	3	3	0	0	0	0	0	0	0	0	1	1	0	0	1	1	2	0	2	2	0	0	0	0	0	1	1	3	0	1	0	0	0	0	0
	TRUE	Empty	WD repeat-containing protein 1 OS=Rattus norvegicus GN=Wdr1 PE=1 SV=3	WDR1_RAT	66 kDa		0.47	[]	0	0	0	0	0	0	1	5	0	0	0	0	0	0	0	0	0	0	0	0	0	0	0	1	1	0	0	0	0	0	0	2	0	2	0	0	0	0	0	0	0
	TRUE	Empty	Syndecan-4 OS=Rattus norvegicus GN=Sdc4 PE=1 SV=1	SDC4_RAT	22 kDa		0.014	CON high, D13 low, D21 low	0	0	0	1	0	0	1	2	3	2	0	0	0	2	0	0	2	2	0	0	0	0	0	0	0	0	0	0	0	0	0	0	0	0	0	0	0	0	0	0	0
	TRUE	Empty	Isopentenyl-diphosphate Delta-isomerase 1 OS=Rattus norvegicus GN=Idi1 PE=2 SV=2	IDI1_RAT	26 kDa		0.15	[]	0	0	0	0	0	2	0	0	1	1	0	1	0	2	0	0	0	0	0	1	0	1	0	0	1	0	0	0	0	0	0	1	0	0	0	0	0	0	0	0	1
	TRUE	Empty	Placenta-expressed transcript 1 protein OS=Rattus norvegicus GN=Plet1 PE=2 SV=1	PLET1_RAT	27 kDa		0.0012	CON high, D13 low, D21 low	2	1	0	1	0	2	1	1	2	1	1	1	2	2	0	0	0	1	0	0	0	1	0	0	1	0	0	0	0	1	0	0	0	0	0	0	0	1	0	3	0
	TRUE	Empty	Cell adhesion molecule 3 OS=Rattus norvegicus GN=Cadm3 PE=1 SV=1	CADM3_RAT	43 kDa		0.095	[]	0	0	1	0	1	0	0	0	0	2	0	1	0	0	0	0	1	0	1	0	0	0	0	0	0	0	0	0	0	0	1	0	0	0	0	0	1	2	0	0	1
	TRUE	Empty	Protein ERGIC-53 OS=Rattus norvegicus GN=Lman1 PE=1 SV=1	LMAN1_RAT	58 kDa		0.35	[]	0	0	0	0	0	0	0	0	1	0	0	1	0	0	1	1	3	2	0	2	1	1	0	0	2	1	1	0	0	0	0	0	0	1	1	0	0	0	0	0	0
	TRUE	Empty	Syntaxin-binding protein 2 OS=Rattus norvegicus GN=Stxbp2 PE=2 SV=1	STXB2_RAT	67 kDa		0.15	[]	0	0	1	0	0	0	2	2	0	0	0	0	0	0	0	0	0	0	0	0	0	1	0	0	1	3	2	1	0	1	0	1	0	0	0	0	0	0	0	0	0
	TRUE	Empty	BRO1 domain-containing protein BROX OS=Rattus norvegicus GN=Brox PE=2 SV=1	BROX_RAT	46 kDa		0.0046	CON low, D13 high, D21 low	0	0	0	2	1	0	0	1	0	1	0	0	0	0	0	0	1	0	0	1	1	0	1	0	2	0	1	0	1	0	0	0	2	1	1	1	0	0	0	1	0
	TRUE	Empty	PDZ domain-containing protein GIPC2 OS=Rattus norvegicus GN=Gipc2 PE=2 SV=1	GIPC2_RAT	34 kDa		0.1	[]	0	0	0	0	0	0	1	1	0	0	0	0	0	0	0	0	0	0	0	2	0	0	2	1	2	1	0	0	0	0	0	1	3	1	0	0	0	0	0	0	0
	TRUE	Empty	Lactase-phlorizin hydrolase OS=Rattus norvegicus GN=Lct PE=2 SV=2	LPH_RAT	217 kDa		0.53	[]	0	0	0	0	0	0	0	0	0	0	0	0	0	3	0	0	0	0	0	0	0	0	0	0	0	0	0	0	0	2	0	0	0	0	1	0	0	0	0	0	0
	TRUE	Empty	Receptor-type tyrosine-protein phosphatase S OS=Rattus norvegicus GN=Ptprs PE=1 SV=2	PTPRS_RAT	212 kDa		0.00039	CON high, D13 low, D21 low	0	1	0	1	1	2	0	0	2	2	0	1	0	0	0	2	0	2	1	0	0	0	0	0	0	0	0	0	0	0	0	0	0	0	0	0	0	0	0	0	0
	TRUE	Empty	Long-chain-fatty-acid--CoA ligase 4 OS=Rattus norvegicus GN=Acsl4 PE=1 SV=1	ACSL4_RAT	74 kDa		0.25	[]	0	0	0	0	0	0	0	1	0	0	0	0	0	0	0	2	2	1	1	0	1	0	0	0	0	0	2	0	0	0	0	0	1	1	0	0	0	0	0	0	0
	TRUE	Empty	Protein delta homolog 2 OS=Rattus norvegicus GN=Dlk2 PE=3 SV=1	DLK2_RAT	40 kDa		0.045	CON high, D13 low, D21 high	0	1	0	1	1	2	1	1	0	1	0	0	0	2	0	0	1	1	0	0	0	0	0	0	0	0	0	0	0	0	0	0	0	0	0	0	1	2	0	3	0
	TRUE	Empty	Unconventional myosin-Id OS=Rattus norvegicus GN=Myo1d PE=1 SV=3	MYO1D_RAT	116 kDa		0.0032	CON low, D13 high, D21 low	0	0	0	0	0	0	1	1	0	0	0	0	0	0	0	0	1	1	2	1	0	1	0	0	2	2	2	1	0	1	0	1	1	0	0	0	0	0	0	0	0
	TRUE	Empty	Destrin OS=Rattus norvegicus GN=Dstn PE=1 SV=3	DEST_RAT	19 kDa		0.13	[]	0	1	0	0	0	0	1	1	0	1	0	1	0	0	0	2	2	1	0	0	0	0	0	0	1	1	0	1	0	1	1	1	0	1	1	1	0	0	0	0	0
	TRUE	Empty	Adenosine deaminase OS=Rattus norvegicus GN=Ada PE=1 SV=3	ADA_RAT	40 kDa		0.21	[]	0	0	1	1	0	0	0	0	0	0	0	0	0	0	2	1	1	1	1	3	0	0	1	0	0	0	0	0	0	1	0	0	0	1	0	0	0	0	0	0	0
	TRUE	Empty	Galectin-3 OS=Rattus norvegicus GN=Lgals3 PE=1 SV=4	LEG3_RAT	27 kDa		0.39	[]	0	0	1	0	0	0	0	0	1	1	0	0	10	11	0	0	0	0	0	0	0	1	1	0	0	0	0	0	2	0	0	0	0	0	0	0	0	0	0	1	0
	TRUE	Empty	Zymogen granule membrane protein 16 OS=Rattus norvegicus GN=Zg16 PE=2 SV=1	ZG16_RAT	18 kDa		0.46	[]	1	0	0	0	0	0	0	0	0	0	0	0	0	0	0	0	0	0	0	0	0	0	0	0	0	0	0	0	1	1	0	0	0	1	5	4	0	0	0	0	0
	TRUE	Empty	Retinol-binding protein 1 OS=Rattus norvegicus GN=Rbp1 PE=1 SV=2	RET1_RAT	16 kDa		0.026	CON high, D13 high, D21 low	0	1	0	1	0	2	1	1	0	0	0	0	0	2	0	0	0	0	0	1	0	0	1	0	0	0	0	0	0	0	0	1	1	0	0	0	0	0	0	0	0
	TRUE	Empty	Sodium/calcium exchanger 3 OS=Rattus norvegicus GN=Slc8a3 PE=1 SV=1	NAC3_RAT	103 kDa		0.0059	CON high, D13 low, D21 low	0	1	0	1	0	0	1	1	1	2	0	0	0	0	1	0	1	1	0	0	0	0	0	0	0	0	0	0	0	0	0	0	0	0	0	0	0	0	0	0	0
	TRUE	Empty	Myc box-dependent-interacting protein 1 OS=Rattus norvegicus GN=Bin1 PE=1 SV=1	BIN1_RAT	65 kDa		0.014	CON high, D13 low, D21 low	1	1	0	0	0	0	1	0	0	2	0	0	0	0	0	0	1	0	0	0	0	0	0	0	0	0	0	0	0	0	0	0	0	0	0	0	0	0	0	0	0
	TRUE	Empty	Argininosuccinate lyase OS=Rattus norvegicus GN=Asl PE=2 SV=1	ARLY_RAT	52 kDa		0.37	[]	0	0	0	0	0	1	1	4	0	0	0	1	0	0	0	0	0	1	0	0	0	0	1	0	1	0	1	0	0	0	0	0	1	0	0	0	0	0	0	0	0
	TRUE	Empty	Coagulation factor IX OS=Rattus norvegicus GN=F9 PE=2 SV=2	FA9_RAT	52 kDa		0.003	CON high, D13 low, D21 low	3	3	0	1	1	1	1	0	0	0	1	1	0	0	1	1	1	1	0	0	0	1	0	0	0	0	0	0	0	0	0	0	0	0	0	0	0	0	0	0	0
	TRUE	Empty	Lipoprotein lipase OS=Rattus norvegicus GN=Lpl PE=1 SV=1	LIPL_RAT	53 kDa		0.98	[]	0	0	0	0	0	0	0	0	0	0	0	3	0	0	0	0	2	2	0	0	0	0	0	0	0	0	0	0	0	0	0	0	0	0	1	4	0	0	0	0	0
	TRUE	Empty	Dipeptidyl peptidase 3 OS=Rattus norvegicus GN=Dpp3 PE=1 SV=2	DPP3_RAT	83 kDa		0.51	[]	0	0	0	0	0	0	2	3	0	0	0	0	0	0	0	0	0	0	0	0	0	1	0	1	0	0	0	0	0	0	0	1	0	0	0	0	0	0	0	0	0
	TRUE	Empty	Dynein light chain 2, cytoplasmic OS=Rattus norvegicus GN=Dynll2 PE=1 SV=1	DYL2_RAT	10 kDa		0.11	[]	0	0	0	0	0	0	0	1	0	0	0	0	0	0	0	0	0	0	0	0	0	0	0	0	1	3	0	1	0	2	0	0	0	0	0	0	0	0	0	0	0
	TRUE	Empty	Xaa-Pro aminopeptidase 1 OS=Rattus norvegicus GN=Xpnpep1 PE=1 SV=1	XPP1_RAT	70 kDa		0.46	[]	0	0	0	0	0	0	4	2	0	0	0	0	0	0	0	0	0	1	0	1	0	0	0	0	3	0	0	0	0	0	0	0	0	0	0	0	0	0	0	0	0
	TRUE	Empty	Ras-related protein Rab-7a OS=Rattus norvegicus GN=Rab7a PE=1 SV=2	RAB7A_RAT	24 kDa		0.033	CON high, D13 high, D21 low	0	0	0	0	0	0	0	2	1	1	0	1	0	0	0	1	1	1	1	0	0	0	0	1	0	1	0	0	0	0	0	2	1	1	0	0	0	0	0	0	0
	TRUE	Empty	Low molecular weight phosphotyrosine protein phosphatase OS=Rattus norvegicus GN=Acp1 PE=1 SV=3	PPAC_RAT	18 kDa		0.82	[]	1	0	0	0	0	0	0	1	0	0	0	1	0	0	0	1	0	1	0	0	0	0	0	1	0	1	0	1	0	1	0	0	0	1	0	0	0	0	0	0	0
	TRUE	Empty	Procollagen-lysine,2-oxoglutarate 5-dioxygenase 2 OS=Rattus norvegicus GN=Plod2 PE=2 SV=1	PLOD2_RAT	85 kDa		0.44	[]	0	0	2	1	0	0	1	0	0	0	0	0	0	0	0	0	0	0	0	0	0	0	0	0	0	0	0	0	0	0	0	0	1	1	0	0	0	0	0	0	0
	TRUE	Empty	Biliverdin reductase A OS=Rattus norvegicus GN=Blvra PE=1 SV=1	BIEA_RAT	34 kDa		0.28	[]	0	0	0	0	0	0	2	2	0	1	0	0	0	0	0	0	1	1	0	0	0	0	0	0	1	2	0	1	0	0	0	1	0	0	0	0	0	0	0	0	0
	TRUE	Empty	Disabled homolog 2 OS=Rattus norvegicus GN=Dab2 PE=1 SV=1	DAB2_RAT	82 kDa		0.86	[]	0	0	0	0	0	0	2	3	0	0	0	0	0	0	0	0	0	0	0	0	0	0	0	0	1	1	0	0	0	0	0	0	1	2	0	0	0	0	0	0	0
	TRUE	Empty	Heat shock protein HSP 90-alpha OS=Rattus norvegicus GN=Hsp90aa1 PE=1 SV=3	HS90A_RAT	85 kDa	TRUE	0.037	CON high, D13 low, D21 low	5	0	0	1	0	1	5	3	0	1	0	1	0	2	0	0	0	1	0	0	0	1	0	0	1	1	1	1	0	0	0	0	0	0	0	1	0	0	0	0	0
	TRUE	Empty	Killer cell lectin-like receptor subfamily G member 1 OS=Rattus norvegicus GN=Klrg1 PE=1 SV=1	KLRG1_RAT	21 kDa		0.047	CON high, D13 low, D21 low	0	0	1	1	1	0	1	1	0	1	0	0	0	0	0	0	1	0	0	0	0	0	0	0	0	0	0	0	0	0	0	0	0	1	0	0	0	0	0	0	0
	TRUE	Empty	Epidermal growth factor receptor kinase substrate 8 OS=Rattus norvegicus GN=Eps8 PE=1 SV=2	EPS8_RAT	92 kDa		0.38	[]	0	0	0	0	0	0	1	1	0	0	0	0	0	0	0	0	0	0	0	0	0	0	0	0	0	0	0	0	0	0	0	0	0	0	0	0	0	0	0	0	0
	TRUE	Empty	Fibrinogen-like protein 1 OS=Rattus norvegicus GN=Fgl1 PE=2 SV=1	FGL1_RAT	36 kDa		0.00029	CON low, D13 high, D21 low	0	0	0	0	0	0	0	1	0	0	0	0	0	0	0	1	1	2	1	1	1	2	1	0	0	2	1	0	1	2	0	0	2	0	1	0	0	0	0	0	0
	TRUE	Empty	Plastin-3 OS=Rattus norvegicus GN=Pls3 PE=1 SV=2	PLST_RAT	71 kDa		0.084	[]	0	0	0	0	0	0	2	1	0	0	0	0	0	0	0	0	1	0	1	0	0	0	1	0	1	0	1	0	0	0	1	1	2	0	1	0	0	0	0	0	1
	TRUE	Empty	Platelet-activating factor acetylhydrolase IB subunit beta OS=Rattus norvegicus GN=Pafah1b2 PE=1 SV=1	PA1B2_RAT	26 kDa		0.0045	CON high, D13 high, D21 low	0	0	1	0	0	0	1	1	0	0	0	1	0	0	0	1	0	1	1	0	0	0	0	1	1	1	0	2	0	0	0	1	1	1	0	0	0	0	0	0	0
	TRUE	Empty	2-amino-3-carboxymuconate-6-semialdehyde decarboxylase OS=Rattus norvegicus GN=Acmsd PE=1 SV=1	ACMSD_RAT	38 kDa		0.5	[]	0	0	0	0	0	0	5	4	0	0	0	0	0	0	0	0	0	0	0	0	0	0	0	0	0	1	0	0	0	0	0	1	1	1	0	0	0	0	0	0	0
	TRUE	Empty	Cytosol aminopeptidase OS=Rattus norvegicus GN=Lap3 PE=1 SV=1	AMPL_RAT	56 kDa		0.51	[]	0	0	0	0	0	0	4	5	0	0	0	0	0	0	0	0	0	0	0	0	0	0	0	0	1	2	0	0	0	0	0	1	0	0	0	0	0	0	0	0	0
	TRUE	Empty	Carbonyl reductase [NADPH] 1 OS=Rattus norvegicus GN=Cbr1 PE=1 SV=2	CBR1_RAT	31 kDa		0.13	[]	0	1	0	0	0	0	0	1	0	0	0	1	0	0	0	0	0	2	0	1	0	0	0	0	1	2	0	1	0	0	0	0	1	5	0	0	0	0	0	0	0
	TRUE	Empty	Ferritin heavy chain OS=Rattus norvegicus GN=Fth1 PE=1 SV=3	FRIH_RAT	21 kDa		0.77	[]	0	0	0	0	0	0	0	0	0	0	0	0	0	3	0	0	0	0	0	0	0	0	0	0	0	0	0	0	0	1	0	0	0	0	0	1	0	0	0	0	0
	TRUE	Empty	Opioid-binding protein/cell adhesion molecule OS=Rattus norvegicus GN=Opcml PE=1 SV=2	OPCM_RAT	38 kDa	TRUE	0.45	[]	1	0	1	0	1	1	0	0	2	0	0	0	0	2	1	1	0	0	0	0	0	0	0	0	0	0	1	2	0	0	0	0	0	0	0	0	0	0	0	0	0
	TRUE	Empty	Neurogenic locus notch homolog protein 1 OS=Rattus norvegicus GN=Notch1 PE=1 SV=3	NOTC1_RAT	271 kDa		0.017	CON high, D13 low, D21 low	0	1	1	1	0	2	1	0	2	1	0	0	0	0	1	1	0	0	0	1	0	0	0	0	0	0	0	0	0	0	0	0	0	0	0	0	0	1	0	0	0
	TRUE	Empty	Fibromodulin OS=Rattus norvegicus GN=Fmod PE=2 SV=1	FMOD_RAT	43 kDa		0.18	[]	1	0	0	0	0	0	1	0	1	0	0	0	0	0	0	0	0	0	0	0	0	0	0	0	0	0	0	0	0	0	0	0	0	0	0	0	0	0	0	0	0
	TRUE	Empty	Solute carrier family 22 member 7 OS=Rattus norvegicus GN=Slc22a7 PE=1 SV=1	S22A7_RAT	59 kDa		0.19	[]	0	0	0	0	0	0	1	1	0	0	0	0	0	0	0	0	0	1	0	0	0	0	0	0	0	0	0	0	0	0	0	0	0	0	0	0	0	0	0	0	0
	TRUE	Empty	LIM and SH3 domain protein 1 OS=Rattus norvegicus GN=Lasp1 PE=1 SV=1	LASP1_RAT	30 kDa		0.82	[]	2	0	0	0	0	0	1	0	1	1	0	0	0	0	0	0	1	2	0	0	0	0	0	0	1	0	0	0	0	0	0	0	3	2	0	0	1	0	0	0	1
	TRUE	Empty	Solute carrier family 22 member 5 OS=Rattus norvegicus GN=Slc22a5 PE=1 SV=1	S22A5_RAT	63 kDa		0.0081	CON low, D13 high, D21 low	0	0	0	0	0	0	1	1	0	0	0	0	0	0	0	0	0	0	0	1	0	1	0	0	1	1	0	1	0	1	3	1	0	0	1	1	0	0	0	0	1
	TRUE	Empty	Thrombospondin-4 OS=Rattus norvegicus GN=Thbs4 PE=1 SV=1	TSP4_RAT	108 kDa		0.11	[]	0	1	0	0	2	1	0	1	2	1	0	1	0	0	0	0	0	1	0	0	0	0	0	0	0	0	0	0	0	0	0	1	0	0	0	1	0	1	0	1	0
	TRUE	Empty	Monoglyceride lipase OS=Rattus norvegicus GN=Mgll PE=1 SV=1	MGLL_RAT	33 kDa		0.013	CON high, D13 high, D21 low	0	0	0	0	0	0	1	1	0	0	0	0	0	0	0	1	1	1	1	1	1	0	0	0	2	1	1	0	0	0	1	0	1	1	0	0	0	0	0	0	0
	TRUE	Empty	Isoaspartyl peptidase/L-asparaginase OS=Rattus norvegicus GN=Asrgl1 PE=1 SV=1	ASGL1_RAT	34 kDa		0.25	[]	0	0	0	0	0	0	0	1	0	2	0	0	0	0	0	0	0	1	0	0	0	0	0	0	1	0	0	0	0	0	0	0	0	1	0	0	0	0	0	0	0
	TRUE	Empty	Carboxypeptidase B OS=Rattus norvegicus GN=Cpb1 PE=1 SV=1	CBPB1_RAT	48 kDa		0.96	[]	0	0	0	0	0	0	0	0	0	0	0	0	2	3	0	0	0	0	0	0	0	0	0	0	1	0	0	0	0	0	1	2	0	0	1	0	0	0	0	0	0
	TRUE	Empty	Cadherin-6 OS=Rattus norvegicus GN=Cdh6 PE=1 SV=1	CADH6_RAT	88 kDa		0.0021	CON high, D13 low, D21 low	1	0	1	1	1	2	0	0	2	1	0	1	0	0	0	0	0	0	0	0	0	0	0	0	0	0	0	0	0	0	0	0	0	0	0	0	0	0	0	0	0
	TRUE	Empty	Protein disulfide-isomerase A3 OS=Rattus norvegicus GN=Pdia3 PE=1 SV=2	PDIA3_RAT	57 kDa		0.22	[]	1	1	0	0	0	0	0	0	1	2	0	1	0	2	0	0	0	0	0	0	0	0	0	0	0	1	0	0	0	0	0	0	0	0	0	0	0	0	0	0	0
	TRUE	Empty	CXADR-like membrane protein OS=Rattus norvegicus GN=Clmp PE=2 SV=1	CLMP_RAT	41 kDa		0.091	[]	0	0	0	0	0	0	0	0	1	1	0	0	2	0	0	0	0	0	0	0	1	0	0	0	0	0	0	0	0	0	0	0	0	0	0	0	0	1	0	0	0
	TRUE	Empty	Cluster of Hippocalcin-like protein 1 OS=Rattus norvegicus GN=Hpcal1 PE=1 SV=2 (HPCL1_RAT)	HPCL1_RAT [2]	22 kDa	TRUE	0.057	[]	0	0	0	0	0	0	0	1	0	2	0	1	0	2	0	0	1	0	0	0	0	0	0	0	0	1	0	0	0	0	0	0	0	0	0	0	0	0	0	0	0
	TRUE	Empty	Phosphoglucomutase-1 OS=Rattus norvegicus GN=Pgm1 PE=1 SV=2	PGM1_RAT	61 kDa		0.38	[]	0	0	0	0	0	0	1	2	0	0	0	0	0	0	0	0	0	1	0	0	0	0	0	0	0	1	0	0	0	0	0	0	0	0	0	1	0	0	0	0	0
	TRUE	Empty	Voltage-dependent anion-selective channel protein 1 OS=Rattus norvegicus GN=Vdac1 PE=1 SV=4	VDAC1_RAT	31 kDa		0.48	[]	2	0	2	0	1	0	0	0	0	0	0	0	2	0	0	0	0	0	0	0	0	0	0	0	0	0	0	0	0	0	0	0	4	2	0	0	0	0	0	0	0
	TRUE	Empty	Beta-ureidopropionase OS=Rattus norvegicus GN=Upb1 PE=1 SV=1	BUP1_RAT	44 kDa		0.4	[]	0	0	0	0	0	0	2	1	0	0	0	0	0	0	0	0	0	0	0	0	0	0	0	0	1	0	1	0	0	0	0	1	1	0	0	0	0	0	0	0	0
	TRUE	Empty	V-type proton ATPase subunit E 1 OS=Rattus norvegicus GN=Atp6v1e1 PE=1 SV=1	VATE1_RAT	26 kDa		0.28	[]	0	0	0	0	0	0	2	2	0	0	1	0	0	0	0	0	0	0	0	0	0	1	0	0	0	1	0	1	0	0	0	0	1	0	0	1	0	0	0	0	0
	TRUE	Empty	Prostaglandin reductase 1 OS=Rattus norvegicus GN=Ptgr1 PE=2 SV=3	PTGR1_RAT	36 kDa		0.18	[]	0	0	0	0	0	1	0	1	0	0	0	0	0	0	0	0	1	1	0	0	0	0	1	0	0	0	0	0	0	1	0	0	0	0	0	0	0	0	0	0	0
	TRUE	Empty	15 kDa selenoprotein OS=Rattus norvegicus GN=Sep15 PE=1 SV=3	SEP15_RAT	18 kDa		0.037	CON high, D13 high, D21 low	2	1	0	1	0	0	0	1	0	1	0	1	0	0	0	1	0	1	1	1	0	0	0	1	0	0	0	1	0	0	0	0	0	0	0	1	0	0	0	0	0
	TRUE	Empty	Bone morphogenetic protein 3 OS=Rattus norvegicus GN=Bmp3 PE=2 SV=1	BMP3_RAT	53 kDa		0.068	[]	0	2	1	0	0	0	1	0	1	0	0	0	0	0	0	0	0	1	0	0	0	0	0	0	0	0	0	0	0	0	0	0	0	0	0	0	0	1	0	0	0
	TRUE	Empty	Creatine kinase U-type, mitochondrial OS=Rattus norvegicus GN=Ckmt1 PE=1 SV=1	KCRU_RAT	47 kDa		0.067	[]	0	0	0	0	0	0	0	0	0	0	0	0	2	2	0	0	0	0	0	0	2	0	2	1	0	0	0	0	2	1	0	0	0	0	1	2	0	0	0	0	0
	TRUE	Empty	Vacuolar protein sorting-associated protein 4A OS=Rattus norvegicus GN=Vps4a PE=1 SV=1	VPS4A_RAT	49 kDa	TRUE	0.00015	CON high, D13 low, D21 low	0	2	0	1	0	2	0	1	0	2	0	0	0	0	0	2	0	1	0	0	0	0	0	0	0	0	0	0	0	0	0	0	0	0	0	1	0	0	0	0	0
	TRUE	Empty	Cytosolic 10-formyltetrahydrofolate dehydrogenase OS=Rattus norvegicus GN=Aldh1l1 PE=1 SV=3	AL1L1_RAT	99 kDa		0.38	[]	0	0	0	0	0	0	1	2	0	0	0	0	0	0	0	0	0	0	0	0	0	0	0	0	0	0	0	0	0	0	0	0	0	0	0	0	0	0	0	0	0
	TRUE	Empty	Delta-aminolevulinic acid dehydratase OS=Rattus norvegicus GN=Alad PE=1 SV=1	HEM2_RAT	36 kDa		0.38	[]	0	0	0	0	0	0	1	2	0	0	0	0	0	0	0	0	0	0	0	0	0	0	0	0	0	0	0	0	0	0	0	0	0	0	0	0	0	0	0	0	0
	TRUE	Empty	Prelamin-A/C OS=Rattus norvegicus GN=Lmna PE=1 SV=1	LMNA_RAT	74 kDa		0.38	[]	0	0	0	0	0	0	0	0	0	0	0	0	6	11	0	0	0	0	0	0	0	0	0	0	0	0	0	0	0	0	0	0	0	0	0	0	0	0	0	0	0
	TRUE	Empty	Phosphoserine phosphatase OS=Rattus norvegicus GN=Psph PE=2 SV=1	SERB_RAT	25 kDa		0.22	[]	0	0	1	0	0	1	1	3	0	0	0	1	0	0	0	0	0	0	0	0	0	0	0	0	1	0	0	0	0	0	0	0	1	1	0	0	0	0	0	0	0
	TRUE	Empty	Protein kinase C and casein kinase substrate in neurons 2 protein OS=Rattus norvegicus GN=Pacsin2 PE=1 SV=2	PACN2_RAT	56 kDa		0.75	[]	0	0	0	0	0	0	2	0	1	0	0	0	0	0	0	0	0	0	0	0	0	0	0	0	1	0	0	0	0	0	0	0	1	0	0	0	0	0	0	0	0
	TRUE	Empty	Transmembrane emp24 domain-containing protein 7 OS=Rattus norvegicus GN=Tmed7 PE=1 SV=1	TMED7_RAT	25 kDa		0.0059	CON high, D13 low, D21 low	2	2	0	1	0	0	1	0	2	1	0	1	0	2	0	0	1	0	0	0	0	0	0	0	0	0	0	0	0	0	0	0	0	0	1	0	0	0	0	0	0
	TRUE	Empty	Complement component C8 beta chain OS=Rattus norvegicus GN=C8b PE=2 SV=2	CO8B_RAT	67 kDa		< 0.00010	CON high, D13 low, D21 low	0	1	0	0	1	0	0	1	2	0	0	2	0	0	1	0	0	1	0	0	0	0	0	0	0	0	0	0	0	0	0	0	0	0	0	0	0	0	0	0	0
	TRUE	Empty	Sodium-dependent multivitamin transporter OS=Rattus norvegicus GN=Slc5a6 PE=2 SV=1	SC5A6_RAT	69 kDa		0.53	[]	0	0	0	0	0	0	1	1	0	0	0	0	0	0	0	0	0	0	0	0	0	0	0	1	1	1	0	0	0	0	0	0	0	0	0	1	0	0	0	0	0
	TRUE	Empty	Glutathione peroxidase 1 OS=Rattus norvegicus GN=Gpx1 PE=1 SV=4	GPX1_RAT	22 kDa		0.44	[]	0	0	0	0	0	0	0	3	0	0	0	0	0	0	0	0	0	0	0	1	0	0	0	0	0	0	0	0	0	1	0	1	0	1	0	1	0	0	0	0	0
	TRUE	Empty	Hypoxia up-regulated protein 1 OS=Rattus norvegicus GN=Hyou1 PE=1 SV=1	HYOU1_RAT	111 kDa		0.14	[]	0	0	0	0	0	0	0	0	0	0	0	0	0	0	0	0	0	0	0	0	0	0	0	0	1	0	0	0	0	0	0	0	0	0	0	0	0	0	0	1	0
	TRUE	Empty	Spondin-1 OS=Rattus norvegicus GN=Spon1 PE=1 SV=1	SPON1_RAT	91 kDa		0.08	[]	0	0	0	2	0	1	0	0	0	1	0	0	0	0	0	0	0	0	0	0	0	0	0	0	0	0	0	0	0	0	0	0	0	0	0	0	0	0	0	0	0
	TRUE	Empty	Guanine nucleotide-binding protein G(s) subunit alpha isoforms XLas OS=Rattus norvegicus GN=Gnas PE=1 SV=3	GNAS1_RAT (+1)	123 kDa	TRUE	0.079	[]	0	0	0	0	0	0	2	2	0	0	0	0	0	0	0	1	0	2	0	2	0	0	0	0	2	3	0	0	0	2	0	0	0	3	0	1	0	0	0	0	0
	TRUE	Empty	E-selectin OS=Rattus norvegicus GN=Sele PE=2 SV=1	LYAM2_RAT	60 kDa		0.11	[]	1	0	0	0	2	0	0	0	0	0	0	0	0	0	0	1	0	0	0	0	0	0	0	0	0	0	0	0	0	0	0	0	0	0	0	0	0	0	1	0	1
	TRUE	Empty	Ras-related protein Rab-2A OS=Rattus norvegicus GN=Rab2a PE=2 SV=1	RAB2A_RAT	24 kDa		0.32	[]	0	0	0	0	0	0	1	1	0	0	0	0	0	0	0	0	0	1	0	0	0	0	0	0	0	1	0	0	0	0	0	0	0	0	0	0	0	0	0	0	0
	TRUE	Empty	Protein Z-dependent protease inhibitor OS=Rattus norvegicus GN=Serpina10 PE=2 SV=2	ZPI_RAT	50 kDa		0.06	[]	2	2	1	1	0	0	0	0	0	0	0	0	0	0	1	1	0	0	0	0	0	0	0	0	0	0	0	0	0	0	0	0	0	0	0	0	0	0	0	0	0
	TRUE	Empty	Spectrin alpha chain, non-erythrocytic 1 OS=Rattus norvegicus GN=Sptan1 PE=1 SV=2	SPTN1_RAT	285 kDa		0.26	[]	1	0	0	0	0	0	0	0	0	0	0	0	2	3	0	0	0	0	0	0	0	0	0	0	0	0	0	0	0	0	0	0	0	0	0	0	0	0	0	0	0
	TRUE	Empty	Mitochondrial peptide methionine sulfoxide reductase OS=Rattus norvegicus GN=Msra PE=1 SV=1	MSRA_RAT	26 kDa		0.4	[]	0	0	0	0	0	0	1	1	0	0	0	0	0	0	0	0	0	0	0	0	0	0	0	0	1	2	0	0	0	0	0	2	0	0	0	0	0	0	0	0	0
	TRUE	Empty	Thiopurine S-methyltransferase OS=Rattus norvegicus GN=Tpmt PE=2 SV=1	TPMT_RAT	28 kDa		0.6	[]	0	0	0	0	0	0	1	1	0	0	0	0	0	0	0	0	0	0	0	0	0	0	0	0	2	2	0	0	0	0	0	0	0	0	0	0	0	0	0	0	0
	TRUE	Empty	Protocadherin-16 OS=Rattus norvegicus GN=Dchs1 PE=3 SV=2	PCD16_RAT	346 kDa		0.0061	CON high, D13 low, D21 low	1	2	2	1	1	2	0	0	0	1	0	0	0	0	0	1	0	0	0	0	0	0	0	0	0	0	0	0	0	0	0	0	0	0	0	0	0	0	0	0	0
	TRUE	Empty	Cytochrome c oxidase subunit 6B2 OS=Rattus norvegicus GN=Cox6b2 PE=2 SV=1	CX6B2_RAT	10 kDa		0.043	CON low, D13 high, D21 low	0	0	0	0	0	0	0	0	0	0	0	0	0	0	0	0	0	0	0	1	0	0	1	0	3	3	1	2	0	0	0	0	0	1	0	0	0	0	0	0	0
	TRUE	Empty	L-selectin OS=Rattus norvegicus GN=Sell PE=2 SV=1	LYAM1_RAT	42 kDa		0.0099	CON low, D13 low, D21 high	0	0	0	0	0	0	0	0	0	1	0	0	0	0	0	0	0	0	0	0	0	0	0	1	0	0	0	0	0	0	0	0	0	0	0	0	1	0	0	3	0
	TRUE	Empty	Oncoprotein-induced transcript 3 protein OS=Rattus norvegicus GN=Oit3 PE=2 SV=1	OIT3_RAT	60 kDa		0.00023	CON high, D13 low, D21 low	0	1	0	1	0	1	0	1	0	0	0	1	0	3	0	1	0	1	0	0	0	0	0	0	0	0	0	0	0	0	0	0	0	0	0	0	0	0	0	0	0
	TRUE	Empty	Dihydrolipoyl dehydrogenase, mitochondrial OS=Rattus norvegicus GN=Dld PE=1 SV=1	DLDH_RAT	54 kDa		0.36	[]	0	0	0	0	0	0	1	0	0	0	0	0	0	3	0	0	0	0	0	0	0	0	0	0	1	2	0	0	0	0	0	0	0	0	2	1	0	0	0	0	0
	TRUE	Empty	Cluster of Heat shock 70 kDa protein 1-like OS=Rattus norvegicus GN=Hspa1l PE=2 SV=2 (HS71L_RAT)	HS71L_RAT [3]	71 kDa	TRUE	0.31	[]	8	0	0	0	0	0	0	2	0	0	0	0	0	3	0	3	0	0	0	0	0	0	0	0	0	3	0	2	0	0	0	0	0	0	0	0	0	0	0	0	0
	TRUE	Empty	Thioredoxin reductase 1, cytoplasmic OS=Rattus norvegicus GN=Txnrd1 PE=1 SV=5	TRXR1_RAT	55 kDa	TRUE	0.48	[]	0	0	0	0	0	0	3	3	0	0	0	0	0	0	0	0	0	0	0	0	0	0	0	0	0	1	0	0	0	0	0	1	0	0	0	0	0	0	0	0	0
	TRUE	Empty	Hypoxanthine-guanine phosphoribosyltransferase OS=Rattus norvegicus GN=Hprt1 PE=1 SV=1	HPRT_RAT	24 kDa		0.21	[]	0	0	0	0	0	0	1	2	0	0	0	0	0	0	0	1	0	0	1	0	0	0	1	0	0	0	0	0	0	0	0	1	1	1	0	0	0	0	0	0	0
	TRUE	Empty	5-oxoprolinase OS=Rattus norvegicus GN=Oplah PE=1 SV=2	OPLA_RAT	138 kDa		0.51	[]	0	0	0	0	0	0	2	2	0	0	0	0	0	0	0	0	0	0	0	0	0	0	0	1	1	0	0	0	0	0	0	0	0	0	0	0	0	0	0	0	0
	TRUE	Empty	C-type lectin domain family 2 member D3 OS=Rattus norvegicus GN=Clec2d3 PE=2 SV=1	CL2D3_RAT	28 kDa		0.0014	CON high, D13 low, D21 low	1	2	0	1	0	1	0	1	0	1	0	1	0	2	0	0	0	0	0	0	0	0	0	0	0	0	0	0	0	0	0	0	0	0	0	0	0	0	0	0	0
	TRUE	Empty	Stress-70 protein, mitochondrial OS=Rattus norvegicus GN=Hspa9 PE=1 SV=3	GRP75_RAT	74 kDa		0.28	[]	3	0	0	0	0	0	0	0	0	0	0	0	2	2	0	0	0	0	0	0	1	1	0	0	0	0	0	0	0	0	0	0	0	1	0	0	0	0	0	0	0
	TRUE	Empty	Creatine kinase B-type OS=Rattus norvegicus GN=Ckb PE=1 SV=2	KCRB_RAT	43 kDa		0.069	[]	0	1	2	0	0	0	0	0	1	2	0	0	0	2	0	0	0	0	0	0	0	1	0	0	0	0	0	0	1	0	0	0	0	0	1	0	0	0	0	0	0
	TRUE	Empty	Chymotrypsinogen B OS=Rattus norvegicus GN=Ctrb1 PE=1 SV=1	CTRB1_RAT	28 kDa		0.43	[]	0	0	0	0	0	0	0	0	0	0	0	0	4	8	0	0	0	0	0	0	0	0	0	0	0	0	0	0	0	0	0	0	0	0	0	0	0	0	0	0	0
	TRUE	Empty	Excitatory amino acid transporter 3 OS=Rattus norvegicus GN=Slc1a1 PE=1 SV=1	EAA3_RAT	57 kDa		0.44	[]	0	0	0	0	0	0	3	2	0	0	0	0	0	0	0	0	0	0	0	0	0	0	0	0	0	1	0	0	0	0	0	0	0	0	0	0	0	0	0	0	0
	TRUE	Empty	Glycerol kinase OS=Rattus norvegicus GN=Gk PE=2 SV=1	GLPK_RAT	57 kDa		0.49	[]	0	0	0	0	0	0	4	2	0	0	0	0	0	0	0	0	0	0	0	0	0	0	0	0	1	1	0	0	0	0	0	0	0	0	0	0	0	0	0	0	0
	TRUE	Empty	Protein NDRG1 OS=Rattus norvegicus GN=Ndrg1 PE=1 SV=1	NDRG1_RAT	43 kDa		0.43	[]	0	0	0	0	0	0	1	2	0	0	0	1	0	0	0	0	0	1	0	0	0	0	0	0	0	0	0	0	0	0	0	1	0	0	1	0	0	0	0	0	0
	TRUE	Empty	Acyl-coenzyme A thioesterase 2, mitochondrial OS=Rattus norvegicus GN=Acot2 PE=1 SV=1	ACOT2_RAT	50 kDa		0.28	[]	0	0	0	0	0	0	1	1	0	0	0	0	0	0	0	0	0	0	0	0	0	0	0	0	0	0	0	0	0	0	0	2	1	1	0	0	0	0	0	0	0
	TRUE	Empty	60 kDa heat shock protein, mitochondrial OS=Rattus norvegicus GN=Hspd1 PE=1 SV=1	CH60_RAT	61 kDa		0.38	[]	6	0	0	0	0	0	0	0	0	0	0	0	0	0	0	0	0	0	0	0	0	0	0	0	0	0	0	0	0	0	0	0	0	0	0	0	0	0	0	0	0
	TRUE	Empty	Clathrin heavy chain 1 OS=Rattus norvegicus GN=Cltc PE=1 SV=3	CLH1_RAT	192 kDa		0.55	[]	0	0	0	0	0	0	0	2	0	0	0	0	0	0	0	0	0	0	0	0	0	0	0	0	0	1	0	0	0	0	0	0	0	0	0	0	0	0	0	0	0
	TRUE	Empty	S-formylglutathione hydrolase OS=Rattus norvegicus GN=Esd PE=2 SV=1	ESTD_RAT	31 kDa		0.5	[]	0	0	0	0	0	0	2	1	0	0	0	0	0	0	0	0	0	0	0	0	0	0	0	0	0	0	0	0	0	0	0	0	0	0	0	1	0	0	0	0	0
	TRUE	Empty	Solute carrier organic anion transporter family member 1A3 OS=Rattus norvegicus GN=Slco1a3 PE=2 SV=2	SO1A3_RAT	74 kDa	TRUE	0.86	[]	0	0	0	0	0	0	4	0	0	0	0	0	0	0	0	0	0	0	0	0	0	0	0	0	0	2	0	0	0	0	1	0	0	0	0	0	0	0	0	0	1
	TRUE	Empty	Protein-glutamine gamma-glutamyltransferase E OS=Rattus norvegicus GN=Tgm3 PE=3 SV=1	TGM3_RAT	77 kDa		0.12	[]	0	0	0	0	0	0	0	0	0	0	0	0	0	0	0	0	0	0	0	0	0	0	2	2	0	0	0	1	0	0	0	0	0	0	1	0	0	0	0	0	0
	TRUE	Empty	Protein S100-G OS=Rattus norvegicus GN=S100g PE=1 SV=3	S100G_RAT	9 kDa		0.017	CON high, D13 low, D21 low	2	2	0	1	0	0	0	0	2	2	0	0	2	2	0	0	0	0	0	0	0	0	0	0	0	0	0	0	0	0	0	0	0	0	0	0	0	0	0	0	0
	TRUE	Empty	Solute carrier family 12 member 1 OS=Rattus norvegicus GN=Slc12a1 PE=1 SV=1	S12A1_RAT	121 kDa		0.039	CON high, D13 low, D21 low	0	0	1	1	0	2	1	0	0	0	0	0	0	0	0	0	0	0	0	0	0	0	0	0	0	0	0	0	0	0	0	0	0	0	0	0	0	0	0	0	0
	TRUE	Empty	Ras-related protein Ral-B OS=Rattus norvegicus GN=Ralb PE=2 SV=1	RALB_RAT	23 kDa		0.72	[]	0	0	0	0	0	0	0	1	0	0	0	1	0	0	0	0	0	0	0	0	0	0	0	0	0	1	0	0	0	0	0	0	1	1	0	0	0	0	0	0	0
	TRUE	Empty	Ubiquitin-conjugating enzyme E2 N OS=Rattus norvegicus GN=Ube2n PE=1 SV=1	UBE2N_RAT	17 kDa		0.36	[]	0	0	0	0	0	0	1	1	0	0	0	0	0	0	0	0	0	0	0	1	0	0	0	1	0	0	0	0	0	0	0	0	1	0	0	0	0	0	0	0	0
	TRUE	Empty	Cluster of Tropomyosin alpha-3 chain OS=Rattus norvegicus GN=Tpm3 PE=1 SV=2 (TPM3_RAT)	TPM3_RAT [3]	29 kDa	TRUE	0.43	[]	0	0	0	0	0	0	0	1	0	1	0	0	0	0	0	0	0	0	0	0	0	0	0	0	0	0	0	0	0	0	0	0	0	0	0	0	0	0	0	1	0
	TRUE	Empty	Phenylalanine-4-hydroxylase OS=Rattus norvegicus GN=Pah PE=1 SV=3	PH4H_RAT	52 kDa		0.38	[]	0	0	0	0	0	0	1	2	0	0	0	0	0	0	0	0	0	0	0	0	0	0	0	0	0	0	0	0	0	0	0	0	0	0	0	0	0	0	0	0	0
	TRUE	Empty	Arginase-1 OS=Rattus norvegicus GN=Arg1 PE=1 SV=2	ARGI1_RAT	35 kDa		0.065	[]	0	0	0	0	0	0	0	0	0	0	0	0	0	0	0	0	0	0	2	1	0	0	1	0	0	0	0	0	0	0	0	0	3	1	0	0	0	0	0	0	0
	TRUE	Empty	Angiotensin-converting enzyme 2 OS=Rattus norvegicus GN=Ace2 PE=1 SV=1	ACE2_RAT	92 kDa		0.054	[]	0	0	0	1	1	0	0	0	0	0	0	0	0	0	0	2	0	1	0	0	0	0	1	0	0	0	0	0	0	0	0	0	0	0	0	0	0	0	0	0	0
	TRUE	Empty	CD81 antigen OS=Rattus norvegicus GN=Cd81 PE=1 SV=1	CD81_RAT	26 kDa		0.036	CON high, D13 low, D21 low	0	0	1	1	0	0	1	0	1	0	0	0	0	0	1	0	0	0	0	0	0	0	1	0	0	0	0	0	0	0	0	0	0	0	0	0	0	0	0	0	0
	TRUE	Empty	Podocin OS=Rattus norvegicus GN=Nphs2 PE=1 SV=2	PODO_RAT	42 kDa		0.012	CON high, D13 low, D21 low	0	0	0	1	0	0	0	0	0	1	0	1	0	0	0	0	0	1	0	0	0	0	0	0	0	0	0	0	0	0	0	0	0	0	0	0	0	0	0	0	0
	TRUE	Empty	Ly6/PLAUR domain-containing protein 3 OS=Rattus norvegicus GN=Lypd3 PE=1 SV=1	LYPD3_RAT	37 kDa		0.01	CON high, D13 low, D21 low	2	0	1	0	1	1	0	0	0	0	0	0	0	2	0	0	0	0	0	0	0	0	0	0	0	0	0	0	0	0	0	0	0	0	0	0	0	0	0	0	0
	TRUE	Empty	Sodium- and chloride-dependent transporter XTRP3 OS=Rattus norvegicus GN=Slc6a20 PE=2 SV=1	S6A20_RAT	69 kDa		0.51	[]	0	0	0	0	0	0	1	2	0	0	0	0	0	0	0	0	0	0	0	0	0	0	0	0	1	0	0	0	0	0	0	0	0	0	0	0	0	0	0	0	0
	TRUE	Empty	Solute carrier organic anion transporter family member 4C1 OS=Rattus norvegicus GN=Slco4c1 PE=1 SV=1	SO4C1_RAT	79 kDa		0.89	[]	0	0	0	0	0	0	1	1	0	0	0	0	0	0	0	0	0	0	0	0	0	0	0	0	0	0	0	0	0	0	3	0	0	0	0	0	0	0	0	0	0
	TRUE	Empty	Phospholipid hydroperoxide glutathione peroxidase, mitochondrial OS=Rattus norvegicus GN=Gpx4 PE=1 SV=3	GPX41_RAT (+1)	22 kDa		0.33	[]	0	0	0	0	0	0	0	0	0	0	0	0	0	0	0	0	0	0	0	0	0	0	1	0	0	0	0	0	0	0	0	0	2	2	0	0	0	0	0	0	0
	TRUE	Empty	P-selectin OS=Rattus norvegicus GN=Selp PE=2 SV=1	LYAM3_RAT	84 kDa		0.015	CON high, D13 low, D21 low	0	1	0	0	0	2	0	0	1	0	0	0	2	0	0	0	0	0	0	0	0	0	0	0	0	0	0	0	0	0	0	0	0	0	0	0	0	0	0	0	0
	TRUE	Empty	Glyoxalase domain-containing protein 4 OS=Rattus norvegicus GN=Glod4 PE=1 SV=1	GLOD4_RAT	33 kDa		0.29	[]	0	0	0	0	0	0	1	1	0	1	0	0	0	0	0	0	0	0	0	0	0	1	0	0	1	0	0	0	0	0	0	1	0	0	0	0	0	0	0	0	0
	TRUE	Empty	Solute carrier family 2, facilitated glucose transporter member 5 OS=Rattus norvegicus GN=Slc2a5 PE=1 SV=1	GTR5_RAT	56 kDa		0.58	[]	0	0	0	0	0	0	1	0	0	0	0	0	0	0	0	0	0	0	0	0	0	0	0	0	0	1	0	0	0	0	0	0	0	0	0	0	0	0	0	0	0
	TRUE	Empty	Glypican-1 OS=Rattus norvegicus GN=Gpc1 PE=1 SV=1	GPC1_RAT	62 kDa		0.16	[]	0	0	0	0	0	0	0	1	2	0	0	0	0	0	0	0	1	0	0	0	0	0	0	0	1	0	0	0	0	0	0	0	0	0	0	0	0	0	0	0	0
	TRUE	Empty	Cluster of AP-2 complex subunit beta OS=Rattus norvegicus GN=Ap2b1 PE=1 SV=1 (AP2B1_RAT)	AP2B1_RAT [2]	105 kDa	TRUE	0.38	[]	0	0	0	0	0	0	1	1	0	0	0	0	0	0	0	0	0	0	0	0	0	0	0	0	0	0	0	0	0	0	0	0	0	0	0	0	0	0	0	0	0
	TRUE	Empty	Keratin, type I cytoskeletal 20 OS=Rattus norvegicus GN=Krt20 PE=1 SV=2	K1C20_RAT	49 kDa	TRUE	0.59	[]	0	0	0	0	0	0	0	0	0	0	0	0	2	8	0	0	0	0	0	0	0	1	0	0	0	0	0	0	0	0	0	0	0	0	0	0	1	2	0	0	0
	TRUE	Empty	V-type proton ATPase subunit C 1 OS=Rattus norvegicus GN=Atp6v1c1 PE=2 SV=1	VATC1_RAT	44 kDa		0.38	[]	0	0	0	0	0	0	2	1	0	0	0	0	0	0	0	0	0	0	0	0	0	0	0	0	0	0	0	0	0	0	0	0	0	0	0	0	0	0	0	0	0
	TRUE	Empty	Acrosin-binding protein OS=Rattus norvegicus GN=Acrbp PE=2 SV=1	ACRBP_RAT	36 kDa		0.006	CON high, D13 low, D21 low	0	2	1	1	0	1	0	0	0	0	0	1	0	0	0	0	0	1	0	0	0	0	0	0	0	0	0	0	0	0	0	0	0	0	0	0	0	0	0	0	0
	TRUE	Empty	Phenazine biosynthesis-like domain-containing protein OS=Rattus norvegicus GN=Pbld PE=2 SV=1	PBLD_RAT	32 kDa		0.31	[]	0	0	0	0	0	0	1	2	0	0	0	0	0	0	0	0	1	0	0	0	0	0	0	1	0	0	0	0	0	0	0	0	0	0	0	0	0	0	0	0	0
	TRUE	Empty	Proteasome subunit alpha type-6 OS=Rattus norvegicus GN=Psma6 PE=1 SV=1	PSA6_RAT	27 kDa		0.42	[]	0	0	0	0	0	0	1	1	0	0	0	0	0	0	0	2	0	0	0	0	0	0	0	0	2	0	0	0	0	0	0	0	0	0	0	0	0	0	0	0	0
	TRUE	Empty	Reticulon-4 receptor OS=Rattus norvegicus GN=Rtn4r PE=1 SV=2	RTN4R_RAT	51 kDa		0.35	[]	1	0	2	0	0	0	0	0	0	0	0	0	0	0	0	0	0	0	0	0	0	0	0	0	0	0	0	0	0	0	0	0	0	0	0	0	0	0	0	0	0
	TRUE	Empty	Gastrotropin OS=Rattus norvegicus GN=Fabp6 PE=1 SV=3	FABP6_RAT	15 kDa		0.08	[]	0	0	0	0	0	0	0	0	0	0	0	0	0	0	0	0	0	0	0	0	0	0	0	0	1	0	0	0	0	0	0	0	0	0	0	0	0	0	0	0	0
	TRUE	Empty	Xylulose kinase OS=Rattus norvegicus GN=Xylb PE=2 SV=1	XYLB_RAT	58 kDa		0.29	[]	0	0	0	0	0	0	1	1	0	0	0	0	0	0	0	0	0	0	0	0	0	0	0	1	1	1	0	0	0	0	0	1	0	0	0	0	0	0	0	0	0
	TRUE	Empty	Plasma kallikrein OS=Rattus norvegicus GN=Klkb1 PE=1 SV=1	KLKB1_RAT	71 kDa	TRUE	0.056	[]	1	0	0	0	2	0	0	0	0	0	0	1	0	0	0	0	0	0	0	0	0	0	0	0	0	0	0	0	0	0	0	0	0	0	0	0	0	0	0	0	0
	TRUE	Empty	Epithelial cell adhesion molecule OS=Rattus norvegicus GN=Epcam PE=1 SV=1	EPCAM_RAT	35 kDa		0.39	[]	0	0	0	0	0	1	0	0	0	0	0	0	0	5	0	0	0	0	0	0	0	0	0	0	0	0	0	0	0	1	0	0	0	0	0	1	0	0	0	0	0
	TRUE	Empty	Secernin-2 OS=Rattus norvegicus GN=Scrn2 PE=2 SV=1	SCRN2_RAT	47 kDa		0.38	[]	0	0	0	0	0	0	0	1	0	0	0	0	0	0	0	0	0	0	0	0	0	0	0	0	0	0	0	0	0	0	0	0	0	0	0	0	0	0	0	0	0
	TRUE	Empty	F-actin-capping protein subunit beta OS=Rattus norvegicus GN=Capzb PE=1 SV=1	CAPZB_RAT	31 kDa		0.38	[]	0	0	0	0	0	0	1	2	0	0	0	0	0	0	0	0	0	0	0	0	0	0	0	0	0	0	0	0	0	0	0	0	0	0	0	0	0	0	0	0	0
	TRUE	Empty	Adenosine kinase OS=Rattus norvegicus GN=Adk PE=1 SV=3	ADK_RAT	40 kDa		0.28	[]	0	0	0	0	0	1	0	2	0	0	0	0	0	0	0	0	0	0	0	0	0	0	0	0	1	0	0	0	0	0	0	0	1	0	1	0	0	0	0	0	0
	TRUE	Empty	Neurotrimin OS=Rattus norvegicus GN=Ntm PE=1 SV=1	NTRI_RAT	38 kDa	TRUE	0.23	[]	1	2	0	0	0	0	0	0	0	1	0	0	0	0	1	0	0	0	0	0	0	0	0	0	0	0	0	0	0	0	0	0	0	0	0	0	0	0	0	0	0
	TRUE	Empty	Serine protease 23 OS=Rattus norvegicus GN=Prss23 PE=2 SV=1	PRS23_RAT	43 kDa		0.12	[]	0	0	0	1	0	2	0	0	0	0	0	0	0	0	0	0	0	0	0	0	0	0	0	0	0	0	0	0	0	0	0	0	0	0	0	0	0	0	0	0	0
	TRUE	Empty	Ras-related protein Rap-1A OS=Rattus norvegicus GN=Rap1a PE=1 SV=1	RAP1A_RAT	21 kDa		0.43	[]	0	0	0	0	0	0	0	1	0	0	0	0	0	0	0	0	0	0	0	1	0	0	0	0	1	0	0	0	0	0	0	0	0	0	0	0	0	0	0	0	0
	TRUE	Empty	Syntaxin-7 OS=Rattus norvegicus GN=Stx7 PE=1 SV=4	STX7_RAT	30 kDa		0.85	[]	0	0	0	0	0	0	1	1	0	0	0	0	0	0	0	0	0	0	0	0	0	0	0	0	0	1	0	0	0	0	0	1	0	0	0	0	0	0	0	0	0
	TRUE	Empty	Cadherin-17 OS=Rattus norvegicus GN=Cdh17 PE=2 SV=1	CAD17_RAT	92 kDa		0.32	[]	0	0	0	0	0	0	0	0	1	0	0	0	0	3	0	0	0	0	0	0	0	0	0	0	0	0	0	0	0	1	0	0	0	0	0	0	0	0	0	0	0
	TRUE	Empty	Adenine phosphoribosyltransferase OS=Rattus norvegicus GN=Aprt PE=1 SV=1	APT_RAT	20 kDa		0.38	[]	0	0	0	0	0	0	1	2	0	0	0	0	0	0	0	0	0	0	0	0	0	0	0	0	0	0	0	0	0	0	0	0	0	0	0	0	0	0	0	0	0
	TRUE	Empty	3-mercaptopyruvate sulfurtransferase OS=Rattus norvegicus GN=Mpst PE=1 SV=3	THTM_RAT	33 kDa		0.36	[]	0	0	2	0	0	0	0	0	0	0	0	0	0	0	0	0	1	0	0	0	0	0	0	0	0	0	0	0	0	0	0	0	0	0	0	0	0	0	0	0	1
	TRUE	Empty	Nucleophosmin OS=Rattus norvegicus GN=Npm1 PE=1 SV=1	NPM_RAT	33 kDa		0.38	[]	2	0	0	0	0	0	0	0	0	0	0	0	0	0	0	0	0	0	0	0	0	0	0	0	0	0	0	0	0	0	0	0	0	0	0	0	0	0	0	0	0
	TRUE	Empty	Heterogeneous nuclear ribonucleoprotein A1 OS=Rattus norvegicus GN=Hnrnpa1 PE=1 SV=3	ROA1_RAT	34 kDa	TRUE	0.38	[]	6	0	0	0	0	0	0	0	0	0	0	0	0	0	0	0	0	0	0	0	0	0	0	0	0	0	0	0	0	0	0	0	0	0	0	0	0	0	0	0	0
	TRUE	Empty	Tumor susceptibility gene 101 protein OS=Rattus norvegicus GN=Tsg101 PE=1 SV=1	TS101_RAT	44 kDa		0.15	[]	0	0	0	1	0	1	0	0	0	0	0	0	0	0	0	0	0	0	0	0	0	0	0	0	0	0	0	0	0	0	0	0	0	0	0	0	0	0	0	0	0
	TRUE	Empty	Glia-derived nexin OS=Rattus norvegicus GN=Serpine2 PE=1 SV=1	GDN_RAT	44 kDa		0.13	[]	0	0	0	0	0	0	1	1	0	0	0	0	0	0	0	0	1	1	0	0	0	0	0	0	0	0	0	0	0	0	0	0	0	0	0	0	0	0	0	0	0
	TRUE	Empty	Acylphosphatase-2 OS=Rattus norvegicus GN=Acyp2 PE=1 SV=2	ACYP2_RAT	11 kDa		0.21	[]	0	0	0	0	0	0	0	1	0	2	0	0	0	0	0	0	0	0	0	0	0	0	0	0	0	0	0	0	0	0	0	0	0	0	0	0	1	0	0	0	0
	TRUE	Empty	Redox-regulatory protein FAM213A OS=Rattus norvegicus GN=Fam213a PE=1 SV=1	F213A_RAT	26 kDa		0.38	[]	0	0	0	0	0	0	0	0	0	0	0	0	0	0	0	0	0	0	0	0	0	0	0	0	1	2	0	0	0	0	0	0	0	0	0	0	0	0	0	0	0
	TRUE	Empty	Fumarate hydratase, mitochondrial OS=Rattus norvegicus GN=Fh PE=1 SV=1	FUMH_RAT	54 kDa		0.14	[]	2	0	0	0	0	0	0	1	0	0	0	0	0	0	0	0	0	0	0	0	0	0	0	0	0	0	0	0	0	0	0	0	0	0	0	0	0	0	0	0	0
	TRUE	Empty	Cationic trypsin-3 OS=Rattus norvegicus GN=Try3 PE=2 SV=1	TRY3_RAT	26 kDa		0.38	[]	0	0	0	0	0	0	0	0	0	0	0	0	4	6	0	0	0	0	0	0	0	0	0	0	0	0	0	0	0	0	0	0	0	0	0	0	0	0	0	0	0
	TRUE	Empty	Maleylacetoacetate isomerase OS=Rattus norvegicus GN=Gstz1 PE=1 SV=2	MAAI_RAT	24 kDa		0.38	[]	0	0	0	0	0	0	1	1	0	0	0	0	0	0	0	0	0	0	0	0	0	0	0	0	0	0	0	0	0	0	0	0	0	0	0	0	0	0	0	0	0
	TRUE	Empty	Keratin, type II cytoskeletal 73 OS=Rattus norvegicus GN=Krt73 PE=1 SV=1	K2C73_RAT	60 kDa	TRUE	0.79	[]	0	0	0	0	0	0	0	0	7	11	0	0	0	0	0	0	3	0	0	6	0	0	0	0	2	0	0	0	0	0	0	0	0	0	4	0	0	0	0	0	0
	TRUE	Empty	Cluster of S-methylmethionine--homocysteine S-methyltransferase BHMT2 OS=Rattus norvegicus GN=Bhmt2 PE=2 SV=1 (BHMT2_RAT)	BHMT2_RAT [2]	40 kDa	TRUE	0.38	[]	0	0	0	0	0	0	3	1	0	0	0	0	0	0	0	0	0	0	0	0	0	0	0	0	0	0	0	0	0	0	0	0	0	0	0	0	0	0	0	0	0
	TRUE	Empty	Cluster of Protein kinase C gamma type OS=Rattus norvegicus GN=Prkcg PE=1 SV=1 (KPCG_RAT)	KPCG_RAT [2]	78 kDa	TRUE	0.38	[]	0	0	0	0	0	0	0	0	0	0	0	0	0	3	0	0	0	0	0	0	0	0	0	0	0	0	0	0	0	0	0	0	0	0	0	0	0	0	0	0	0
	TRUE	Empty	Chymotrypsin-like elastase family member 2A OS=Rattus norvegicus GN=Cela2a PE=2 SV=1	CEL2A_RAT	29 kDa		0.75	[]	0	0	0	0	0	0	0	0	0	0	0	0	4	0	0	0	0	0	0	0	0	0	0	1	0	0	0	0	0	0	0	0	0	0	0	1	0	0	0	0	0
	TRUE	Empty	Ubiquitin thioesterase OTUB1 OS=Rattus norvegicus GN=Otub1 PE=1 SV=1	OTUB1_RAT	31 kDa		0.55	[]	0	0	0	0	0	0	1	1	0	0	0	0	0	0	0	0	0	0	0	0	0	0	0	0	1	0	0	0	0	0	0	0	0	0	0	0	0	0	0	0	0
	TRUE	Empty	Outer dense fiber protein 1 OS=Rattus norvegicus GN=Odf1 PE=1 SV=2	ODFP1_RAT	27 kDa		0.22	[]	0	0	0	0	0	0	0	0	0	0	0	0	0	0	0	0	0	0	0	0	0	0	0	0	0	0	0	1	0	0	0	0	2	2	0	0	0	0	0	0	0
	TRUE	Empty	Alcohol dehydrogenase 1 OS=Rattus norvegicus GN=Adh1 PE=1 SV=3	ADH1_RAT	40 kDa		0.38	[]	0	0	0	0	0	0	1	1	0	0	0	0	0	0	0	0	0	0	0	0	0	0	0	0	0	0	0	0	0	0	0	0	0	0	0	0	0	0	0	0	0
	TRUE	Empty	Heterogeneous nuclear ribonucleoprotein C OS=Rattus norvegicus GN=Hnrnpc PE=1 SV=2	HNRPC_RAT	33 kDa		0.38	[]	4	0	0	0	0	0	0	0	0	0	0	0	0	0	0	0	0	0	0	0	0	0	0	0	0	0	0	0	0	0	0	0	0	0	0	0	0	0	0	0	0
	TRUE	Empty	N-acylglucosamine 2-epimerase OS=Rattus norvegicus GN=Renbp PE=2 SV=2	RENBP_RAT	50 kDa		0.38	[]	0	0	0	0	0	0	1	1	0	0	0	0	0	0	0	0	0	0	0	0	0	0	0	0	0	0	0	0	0	0	0	0	0	0	0	0	0	0	0	0	0
	TRUE	Empty	Tropomyosin alpha-4 chain OS=Rattus norvegicus GN=Tpm4 PE=1 SV=3	TPM4_RAT	29 kDa	TRUE	0.27	[]	0	0	0	0	0	0	0	0	0	2	0	0	0	2	0	0	0	0	0	0	0	0	0	0	0	0	0	0	0	0	0	0	0	0	0	0	0	0	0	1	0
	TRUE	Empty	AKT2_RAT-DECOY	AKT2_RAT-DECOY	?		0.38	[]	0	0	0	0	0	0	0	0	0	0	0	0	0	0	0	0	0	0	0	0	0	0	0	0	2	0	0	0	0	0	0	0	0	0	0	0	0	0	0	0	0
	TRUE	Empty	Isocitrate dehydrogenase [NADP], mitochondrial OS=Rattus norvegicus GN=Idh2 PE=1 SV=2	IDHP_RAT	51 kDa	TRUE	0.38	[]	0	0	0	0	0	0	1	1	0	0	0	0	0	0	0	0	0	0	0	0	0	0	0	0	0	0	0	0	0	0	0	0	0	0	0	0	0	0	0	0	0
	TRUE	Empty	Heterogeneous nuclear ribonucleoprotein K OS=Rattus norvegicus GN=Hnrnpk PE=1 SV=1	HNRPK_RAT	51 kDa		0.38	[]	3	0	0	0	0	0	0	0	0	0	0	0	0	0	0	0	0	0	0	0	0	0	0	0	0	0	0	0	0	0	0	0	0	0	0	0	0	0	0	0	0
	TRUE	Empty	60S ribosomal protein L3 OS=Rattus norvegicus GN=Rpl3 PE=1 SV=3	RL3_RAT	46 kDa		0.38	[]	3	0	0	0	0	0	0	0	0	0	0	0	0	0	0	0	0	0	0	0	0	0	0	0	0	0	0	0	0	0	0	0	0	0	0	0	0	0	0	0	0
	TRUE	Empty	Carbamoyl-phosphate synthase [ammonia], mitochondrial OS=Rattus norvegicus GN=Cps1 PE=1 SV=1	CPSM_RAT	165 kDa		0.38	[]	2	0	0	0	0	0	0	0	0	0	0	0	0	0	0	0	0	0	0	0	0	0	0	0	0	0	0	0	0	0	0	0	0	0	0	0	0	0	0	0	0
	TRUE	Empty	Polypyrimidine tract-binding protein 1 OS=Rattus norvegicus GN=Ptbp1 PE=1 SV=1	PTBP1_RAT	59 kDa		0.38	[]	2	0	0	0	0	0	0	0	0	0	0	0	0	0	0	0	0	0	0	0	0	0	0	0	0	0	0	0	0	0	0	0	0	0	0	0	0	0	0	0	0
	TRUE	Empty	40S ribosomal protein S8 OS=Rattus norvegicus GN=Rps8 PE=1 SV=2	RS8_RAT	24 kDa		0.38	[]	2	0	0	0	0	0	0	0	0	0	0	0	0	0	0	0	0	0	0	0	0	0	0	0	0	0	0	0	0	0	0	0	0	0	0	0	0	0	0	0	0
	TRUE	Empty	Intestinal-type alkaline phosphatase 2 OS=Rattus norvegicus PE=1 SV=1	PPBI2_RAT	60 kDa	TRUE	0.38	[]	0	0	0	0	0	0	0	0	0	0	0	0	0	3	0	0	0	0	0	0	0	0	0	0	0	0	0	0	0	0	0	0	0	0	0	0	0	0	0	0	0
END OF FILE
[truncated: 13 more columns]
